# Supplementary material for: Control and Regulation of Substrate Selection in Cytoplasmic and Mitochondrial Catabolic Networks. A Systems Biology Analysis
Source: PubMed Central journal article supplement (PMC6418011; doi:10.3389/fphys.2019.00201), 2019-03-08
Supplement: Data_Sheet_1.pdf [file Data_Sheet_1.pdf]

*Supplementary Material*

**Control and regulation of substrate selection in cytoplasmic and mitochondrial catabolic networks. A systems biology analysis**

**Sonia Cortassa, Miguel A. Aon and Steven J. Sollott**

\* **Correspondence:** Sonia Cortassa: [sonia.cortassa@nih.gov](mailto:sonia.cortassa@nih.gov)





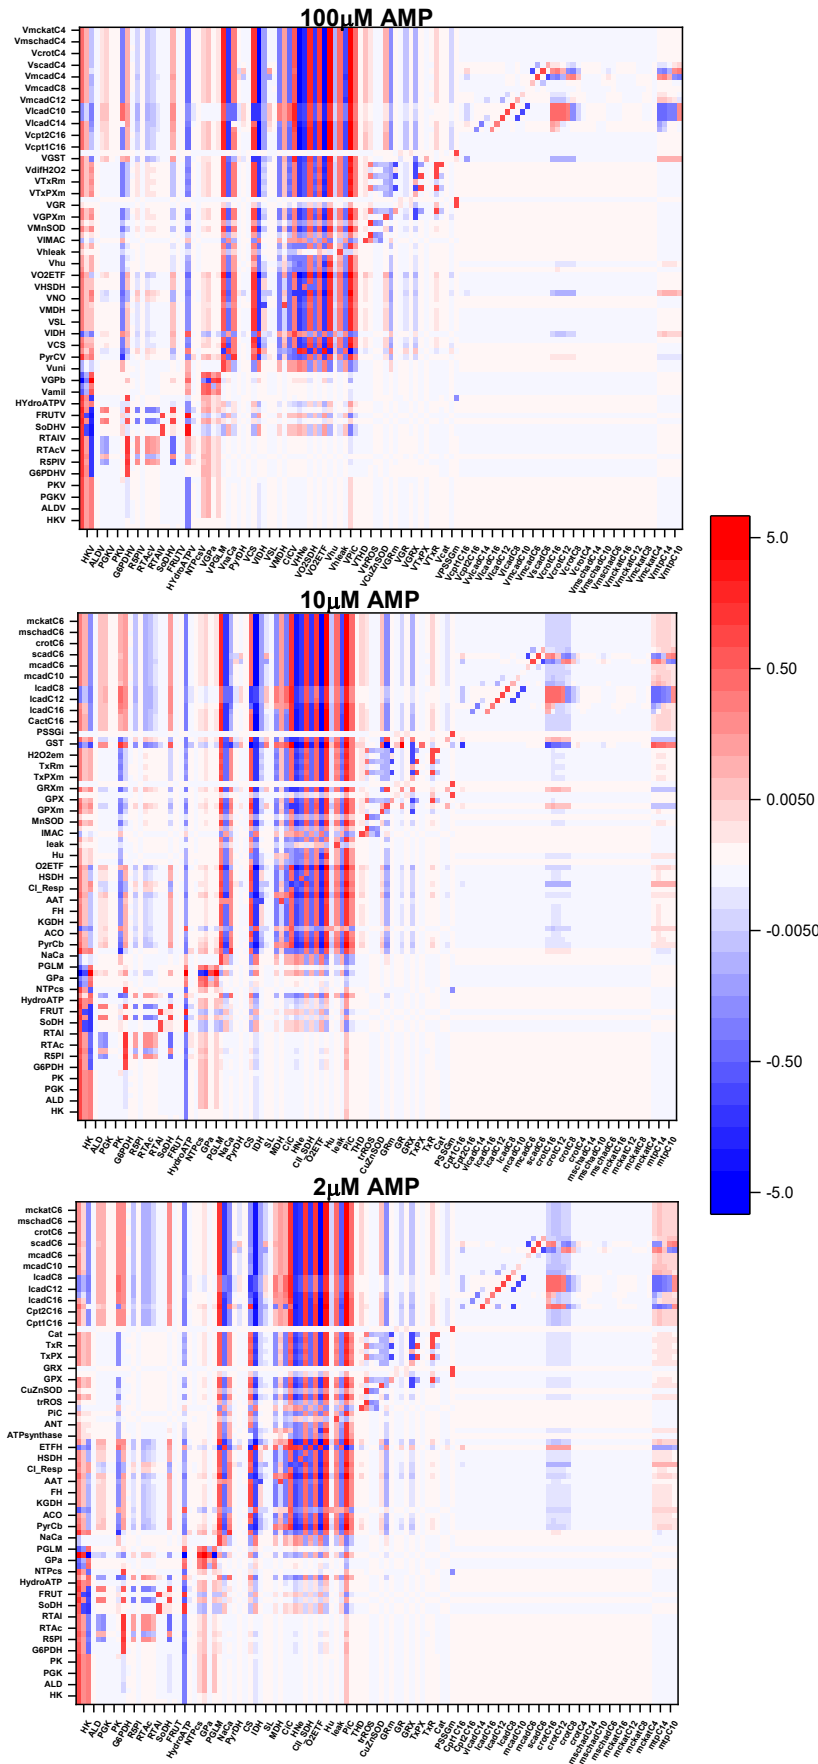

**Supplementary Figure S3.** Heatmaps of flux control coefficients exerted by individual enzymes/transport processes over metabolic reaction steps in the catabolic network following increasing AMP concentration at constant 10mM Glc and 10 μM PCoA. Heatmaps of flux control coefficients obtained by metabolic control analysis of the steady states obtained with the catabolic network model. The conditions for these simulations were 10mM Glc, 10 μM PCoA and variable AMP (100, 10 and 2) as indicated on top each panel (in μM). The red-blue scale represents the magnitude of the flux control coefficients, and is the same for all panels, including the key to the processes, shown in Figure 2.

## 1 Supplementary Section S1. Model Description

### 1.1 Model ordinary differential equations (ODEs)

$$\frac{d[Glc]_i}{dt} = V_T^{Glc} - V_{HK} - V_{ALDR} \quad (S1)$$

$$\frac{d[H6P]}{dt} = V_{HK} + V_{PGLM} - V_{PFK} - V_{G6PD} + V_{TAL} + V_{TK2} \quad (S2)$$

$$\frac{d[FbP]}{dt} = V_{PFK} - V_{ALD} \quad (S3)$$

$$\frac{d[G3P]}{dt} = 2 \cdot V_{ALD} - V_{GAPD} + V_{TK1} - V_{TAL} + V_{TK2} \quad (S4)$$

$$\frac{d[BPG]}{dt} = V_{GAPD} - V_{PGK} \quad (S5)$$

$$\frac{d[3PG]}{dt} = V_{PGK} - V_{Enol} \quad (S6)$$

$$\frac{d[PEP]}{dt} = V_{Enol} - V_{PK} \quad (S7)$$

$$\frac{d[Pyr]}{dt} = V_{PK} - V_{LDH} - V_T^{Pyr} \quad (S8)$$

$$\frac{d[Sor]}{dt} = V_{ALDR} - V_{SoDH} \quad (S9)$$

$$\frac{d[Fru]}{dt} = V_{SoDH} - V_T^{Fru} \quad (S10)$$

$$\frac{d[6PG]}{dt} = V_{G6PD} - V_{6PGO} \quad (S11)$$

$$\frac{d[Ru5P]}{dt} = V_{6PGO} - V_{R5PI} - V_{Ru5PE} \quad (S12)$$

$$\frac{d[R5P]}{dt} = V_{R5PI} - V_{TK1} \quad (S13)$$

$$\frac{d[X5P]}{dt} = V_{Ru5PE} - V_{TK1} - V_{TK2} - V_{XyDH} \quad (S14)$$

$$\frac{d[S7P]}{dt} = V_{TK1} - V_{TAL} \quad (S15)$$

$$\frac{d[E4P]}{dt} = V_{TAL} - V_{TK2} \quad (S16)$$

$$\frac{d[XyOH]}{dt} = V_{XyDH} - V_T^{XyOH} \quad (S17)$$

$$\frac{d[Mal]}{dt} = V_{Gno\_is} - 0.4 \cdot V_{GPa} - 0.6 \cdot V_{GPb} \quad (S18)$$

$$\frac{d[G1P]}{dt} = 0.4 \cdot V_{GPa} + 0.6 \cdot V_{GPb} - V_{PGLM} \quad (S19)$$

$$\frac{d[ATP]_i}{dt} = -V_{HK} - V_{PFK} + V_{PGK} + V_{PK} - V_{cATPase} \quad (S20)$$

$$\frac{d[NADH]_i}{dt} = V_{GAPD} - V_{LDH} + V_{SoDH} + V_{XyDH} - V_{NADHo} \quad (S21)$$

$$\frac{d[NADPH]_i}{dt} = V_{G6PD} + V_{6GLO} - V_{ALDR} - V_{NADPHo} \quad (S22)$$

$$\frac{d[Pyru]_m}{dt} = \frac{V_c}{V_m} V_T^{Pyru} - V_{PDH} - V_{PCb} + V_{ME} \quad (S23)$$

$$\frac{d[Ca^{2+}]_m}{dt} = \delta_{Ca} (V_{uni} - V_{NaCa}) \quad (S24)$$

$$\frac{d[ADP]_m}{dt} = V_{ANT} - V_{ATPase} - V_{SL} + V_{PCb} \quad (S25)$$

$$\frac{d\Delta\Psi_m}{dt} = \frac{V_{He} + V_{He(SDH)} + V_{He(ETF)} - V_{Hu} - V_{ANT} - V_{Hleak} - V_{NaCa} - V_{uni} - V_{IMAC}}{C_{mito}} \quad (S26)$$

$$\frac{d[NADH]_m}{dt} = -V_{O_2} + V_{IDH} + V_{KGDH} + V_{MDH} - V_{THD} + V_{mtp}^{C16} + V_{mschad}^{C16} + V_{mtp}^{C14} + V_{mschad}^{C14} + \dots \quad (S27)$$

$$V_{mtp}^{C12} + V_{mschad}^{C12} + V_{mtp}^{C10} + V_{mschad}^{C10} + V_{mtp}^{C8} + V_{mschad}^{C8} + V_{mschad}^{C6} + V_{mschad}^{C4}$$

$$\frac{d[H^+]_m}{dt} = \delta_H \left( -V_{He} - V_{He(SDH)} - V_{He(ETF)} + V_{Hu} + V_{NaH} + V_{PiC} + V_{Hleak} \right) \quad (S28)$$

$$\frac{d[Pi]_m}{dt} = -V_{ATPase} + V_{PiC} - V_{SL} \quad (S29)$$

$$\frac{d[ISOC]}{dt} = V_{ACO} - V_{IDH} - V_{IDH\_NADP} \quad (S30)$$

$$\frac{d[\alpha KG]}{dt} = V_{IDH} + V_{IDH\_NADP} - V_{KGDH} + V_{ATT} \quad (S31)$$

$$\frac{d[SCoA]}{dt} = V_{KGDH} - V_{SL} \quad (S32)$$

$$\frac{d[Suc]}{dt} = V_{SL} - V_{O_2SDH} \quad (S33)$$

$$\frac{d[FUM]}{dt} = V_{O_2SDH} - V_{FH} \quad (S34)$$

$$\frac{d[MAL]}{dt} = V_{FH} - V_{MDH} + V_{CiC} - V_{ME} \quad (S35)$$

$$\frac{d[OAA]}{dt} = V_{MDH} - V_{CS} - V_{AAT} \quad (S36)$$

$$\frac{d[CIT]}{dt} = V_{CS} - V_{ACO} - V_{CiC} \quad (S37)$$

$$\frac{d[\text{C16Carn}]_i}{dt} = V_{\text{CPT1}} - V_{\text{CACT}} \quad (\text{S38})$$

$$\frac{d[\text{C16Carn}]_m}{dt} = V_{\text{CACT}} - V_{\text{CPT2}} \quad (\text{S39})$$

$$\frac{d[\text{C16CoA}]_m}{dt} = V_{\text{CPT2}} - V_{\text{vlcad}}^{\text{C16}} - V_{\text{lcad}}^{\text{C16}} \quad (\text{S40})$$

$$\frac{d[\text{C16enoylCoA}]_m}{dt} = V_{\text{vlcad}}^{\text{C16}} + V_{\text{lcad}}^{\text{C16}} - V_{\text{cro}}^{\text{C16}} - V_{\text{mtp}}^{\text{C16}} \quad (\text{S41})$$

$$\frac{d[\text{C16OHC CoA}]_m}{dt} = V_{\text{cro}}^{\text{C16}} - V_{\text{mschad}}^{\text{C16}} \quad (\text{S42})$$

$$\frac{d[\text{C16ketoCoA}]_m}{dt} = V_{\text{mschad}}^{\text{C16}} - V_{\text{mckat}}^{\text{C16}} \quad (\text{S43})$$

$$\frac{d[\text{C14CoA}]_m}{dt} = V_{\text{mckat}}^{\text{C16}} + V_{\text{mtp}}^{\text{C16}} - V_{\text{vlcad}}^{\text{C14}} - V_{\text{lcad}}^{\text{C14}} \quad (\text{S44})$$

$$\frac{d[\text{C14enoylCoA}]_m}{dt} = V_{\text{vlcad}}^{\text{C14}} + V_{\text{lcad}}^{\text{C14}} - V_{\text{cro}}^{\text{C14}} - V_{\text{mtp}}^{\text{C14}} \quad (\text{S45})$$

$$\frac{d[\text{C14OHC CoA}]_m}{dt} = V_{\text{cro}}^{\text{C14}} - V_{\text{mschad}}^{\text{C14}} \quad (\text{S46})$$

$$\frac{d[\text{C14ketoCoA}]_m}{dt} = V_{\text{mschad}}^{\text{C14}} - V_{\text{mckat}}^{\text{C14}} \quad (\text{S47})$$

$$\frac{d[\text{C12CoA}]_m}{dt} = V_{\text{mckat}}^{\text{C14}} + V_{\text{mtp}}^{\text{C14}} - V_{\text{vlcad}}^{\text{C12}} - V_{\text{lcad}}^{\text{C12}} - V_{\text{mcd}}^{\text{C12}} \quad (\text{S48})$$

$$\frac{d[\text{C12enoylCoA}]_m}{dt} = V_{\text{vlcad}}^{\text{C12}} + V_{\text{lcad}}^{\text{C12}} + V_{\text{mcd}}^{\text{C12}} - V_{\text{cro}}^{\text{C12}} - V_{\text{mtp}}^{\text{C12}} \quad (\text{S49})$$



$$\frac{d[C12OHC\text{CoA}]_m}{dt} = V_{cro}^{C12} - V_{mschad}^{C12} \quad (\text{S50})$$

$$\frac{d[C12keto\text{CoA}]_m}{dt} = V_{mschad}^{C12} - V_{mckat}^{C12} \quad (\text{S51})$$

$$\frac{d[C10\text{CoA}]_m}{dt} = V_{mckat}^{C12} + V_{mtp}^{C12} - V_{lcad}^{C10} - V_{mcd}^{C10} \quad (\text{S52})$$

$$\frac{d[C10enoyl\text{CoA}]_m}{dt} = V_{lcad}^{C10} + V_{mcd}^{C10} - V_{cro}^{C10} - V_{mtp}^{C10} \quad (\text{S53})$$

$$\frac{d[C10OHC\text{CoA}]_m}{dt} = V_{cro}^{C10} - V_{mschad}^{C10} \quad (\text{S54})$$

$$\frac{d[C10keto\text{CoA}]_m}{dt} = V_{mschad}^{C10} - V_{mckat}^{C10} \quad (\text{S55})$$

$$\frac{d[C8\text{CoA}]_m}{dt} = V_{mckat}^{C10} + V_{mtp}^{C10} - V_{lcad}^{C8} - V_{mcd}^{C8} \quad (\text{S56})$$

$$\frac{d[C8enoyl\text{CoA}]_m}{dt} = V_{lcad}^{C8} + V_{mcd}^{C8} - V_{cro}^{C8} - V_{mtp}^{C8} \quad (\text{S57})$$

$$\frac{d[C8OHC\text{CoA}]_m}{dt} = V_{cro}^{C8} - V_{mschad}^{C8} \quad (\text{S58})$$

$$\frac{d[C8keto\text{CoA}]_m}{dt} = V_{mschad}^{C8} - V_{mckat}^{C8} \quad (\text{S59})$$

$$\frac{d[C6\text{CoA}]_m}{dt} = V_{mckat}^{C8} + V_{mtp}^{C8} - V_{scad}^{C6} - V_{mcd}^{C6} \quad (\text{S60})$$

$$\frac{d[C6enoyl\text{CoA}]_m}{dt} = V_{scad}^{C6} + V_{mcd}^{C6} - V_{cro}^{C6} \quad (\text{S61})$$

$$\frac{d[C6OHC\text{CoA}]_m}{dt} = V_{cro}^{C6} - V_{mschad}^{C6} \quad (\text{S62})$$

$$\frac{d[C6keto\text{CoA}]_m}{dt} = V_{mschad}^{C6} - V_{mckat}^{C6} \quad (\text{S63})$$

$$\frac{d[C4\text{CoA}]_m}{dt} = V_{mckat}^{C6} - V_{scad}^{C4} - V_{mcd}^{C4} \quad (\text{S64})$$

$$\frac{d[C4enoyl\text{CoA}]_m}{dt} = V_{scad}^{C4} + V_{mcd}^{C4} - V_{cro}^{C4} \quad (\text{S65})$$

$$\frac{d[C4OHC\text{CoA}]_m}{dt} = V_{cro}^{C4} - V_{mschad}^{C4} \quad (\text{S66})$$

$$\frac{d[C4keto\text{CoA}]_m}{dt} = V_{mschad}^{C4} - V_{mckat}^{C4} \quad (\text{S67})$$

$$\begin{aligned} \frac{d[Ac\text{CoA}]_m}{dt} = & -V_{CS} + V_{mtp}^{C16} + V_{mckat}^{C16} + V_{mtp}^{C14} + V_{mckat}^{C14} + V_{mtp}^{C12} + V_{mckat}^{C12} + \dots \\ & V_{mtp}^{C10} + V_{mckat}^{C10} + V_{mtp}^{C8} + V_{mckat}^{C8} + V_{mckat}^{C6} + 2V_{mckat}^{C4} \end{aligned} \quad (\text{S68})$$

$$\begin{aligned} \frac{d[FADH_2]_m}{dt} = & -V_{O_2}^{ETF} + V_{vlcad}^{C16} + V_{lcad}^{C16} + V_{vlcad}^{C14} + V_{lcad}^{C14} + V_{vlcad}^{C12} + V_{lcad}^{C12} + \dots \\ & V_{mcd}^{C12} + V_{lcad}^{C10} + V_{mcd}^{C10} + V_{lcad}^{C8} + V_{mcd}^{C8} + V_{mcd}^{C6} + V_{scad}^{C6} + V_{mcd}^{C4} + V_{scad}^{C4} \end{aligned} \quad (\text{S69})$$

$$\frac{d[NADPH]_m}{dt} = V_{IDH\_NADP} + V_{THD} + V_{ME} - V_{GRm} - V_{TxRm} \quad (\text{S70})$$

$$\frac{d[O_2^{\bullet-}]_m}{dt} = shunt(V_{O_2} + V_{O_2SDH}) - V_{MnSOD} - V_{ROS}^{Tr} \quad (\text{S71})$$

$$\frac{d[O_2^{\bullet-}]_i}{dt} = \frac{v_m}{v_i} V_{ROS}^{Tr} - V_{CuZnSOD} \quad (\text{S72})$$

$$\frac{d[H_2O_2]_m}{dt} = V_{MnSOD} - V_{difH_2O_2} - V_{GPXm} - V_{TxPXm} \quad (S73)$$

$$\frac{d[H_2O_2]_i}{dt} = V_{CuZnSOD} + \frac{v_m}{v_i} V_{difH_2O_2} - V_{GPXi} - V_{TxPXi} - V_{CAT} \quad (S74)$$

$$\frac{d[GSH]_m}{dt} = V_{GRm} - V_{GPXm} - V_{GRXm} + V_{GST} - V_{PSSGm} \quad (S75)$$

$$\frac{d[GSH]_i}{dt} = V_{GRi} - V_{GPXi} - V_{GRXi} + \frac{v_m}{v_i} V_{GST} - V_{PSSGi} \quad (S76)$$

$$\frac{d[GSSG]_m}{dt} = 0.5(V_{GPXm} - V_{GRm}) + V_{GRXm} \quad (S77)$$

$$\frac{d[GSSG]_i}{dt} = 0.5(V_{GPXi} - V_{GRi}) + V_{GRXi} \quad (S78)$$

$$\frac{d[TxR]_m}{dt} = V_{TxRm} - V_{TxPXm} \quad (S79)$$

$$\frac{d[TxR]_i}{dt} = V_{TxRi} - V_{TxPXi} \quad (S80)$$

$$\frac{d[PSSG]_m}{dt} = V_{PSSGm} - V_{GRXm} \quad (S81)$$

$$\frac{d[PSSG]_i}{dt} = V_{PSSGi} - V_{GRXi} \quad (S82)$$

## 1.2 Rate Equations and parameters included in the model of the catabolic network

### 1.2.1 Glycolysis

#### *Glucose transport:*

$$V_T^{Glc} = k_T^{Glc} (Glc_o - Glc_i) \quad (S83)$$

**Hexokinase (HK)**

$$V_{HK} = V_{\max}^{HK} \cdot \frac{\left( \frac{ATP_i \cdot Glc_i}{K_{M HK}^{ATP} \cdot K_{M HK}^{Glc}} - \frac{(C_T^{ad} - ATP_i) \cdot H6P}{K_{M HK}^{ATP} \cdot K_{M HK}^{Glc} K_{HK}^{eq}} \right)}{1 + \frac{Glc_i}{K_{M HK}^{Glc}} + \frac{ATP_i}{K_{M HK}^{ATP}} + \frac{ATP_i \cdot Glc_i}{K_{M HK}^{ATP} \cdot K_{M HK}^{Glc}} + \frac{H6P}{K_{M HK}^{H6P}} + \frac{(C_T^{ad} - ATP_i)}{K_{M HK}^{ADP}} + \frac{(C_T^{ad} - ATP_i) \cdot H6P}{K_{M HK}^{ADP} K_{M HK}^{H6P}}} \quad (S84)$$

**Phosphofructokinase (PFK)**

$$V_{PFK} = \frac{\left( V_{\max, f}^{PFK} \frac{ATP_i \cdot H6P}{K_{M PFK}^{ATP} \cdot K_{M PFK}^{H6P}} - V_{\max, r}^{PFK} \frac{(C_T^{ad} - ATP_i) \cdot FBP}{K_{M PFK}^{ADP} K_{M PFK}^{FBP} K_{PFK}^{eq}} \right)}{\Delta} \times \left( \frac{1 + \alpha \cdot L \cdot \left( \frac{\Delta'}{\Delta} \right)^3}{1 + L \cdot \left( \frac{\Delta'}{\Delta} \right)^4} \right) \quad (S85)$$

$$\Delta = \left( 1 + \frac{H6P}{K_{M PFK}^{H6P}} \right) \cdot \left( 1 + \frac{ATP}{K_{M PFK}^{ATP}} \right) + \frac{ADP}{K_{M PFK}^{ADP}} + \frac{FBP}{K_{M PFK}^{FBP}} \left( 1 + \frac{ADP}{K_{M PFK}^{ADP}} \right)$$

$$\Delta' = \left( 1 + \frac{H6P}{K_{M PFK}^{H6P}} \right) \cdot \left( 1 + \frac{ATP}{K_{M PFK}^{ATP}} \right) + \frac{ADP}{K_{M PFK}^{ADP}} + \frac{FBP}{K_{M PFK}^{FBP}} \left( 1 + \frac{ADP}{K_{M PFK}^{ADP}} \right)$$

$$\alpha = \frac{K_{M PFK}^{H6P} K_{M PFK}^{ATP}}{K_{M PFK}^{H6P} K_{M PFK}^{ATP}}$$

$$L = L_o \cdot \left[ \left( \frac{1 + \frac{ATP}{K_{i PFK}^{ATP}}}{1 + d \frac{ATP}{K_{i PFK}^{ATP}}} \right) \cdot \left( \frac{1 + e \frac{AMP}{K_{a PFK}^{AMP}}}{1 + \frac{AMP}{K_{a PFK}^{AMP}}} \right) \cdot \left( \frac{1 + \frac{Cit_{cy}}{K_{i PFK}^{Cit}}}{1 + f \frac{Cit_{cy}}{K_{i PFK}^{Cit}}} \right) \right]^4$$

$$V_{\max, r}^{PFK} = \frac{V_{\max, f}^{PFK} K_{M PFK}^{ADP} K_{M PFK}^{FBP}}{K_{M PFK}^{G6P} K_{M PFK}^{ATP}}$$

**Aldolase (ALD)**

$$V_{ALD} = V_{\max}^{ALD} \cdot \frac{\left( \frac{FBP}{K_{M\ ALD}^{FBP}} - \frac{(G3P)^2}{K_{M\ ALD}^{FBP} K_{ALD}^{eq}} \right)}{1 + \frac{FBP}{K_{M\ ALD}^{FBP}} + 2 \frac{(G3P)}{K_{M\ ALD}^{G3P}}} \quad (S86)$$

**Glyceraldehyde 3 phosphate dehydrogenase (GAPD)**

$$V_{GAPD} = \frac{\left( V_{\max, f}^{GAPD} \frac{G3P \cdot Pi}{K_{M\ GAPD}^{G3P} K_{M\ GAPD}^{Pi}} \left( \frac{C_T^{Pyr} - NADH}{K_{M\ GAPD}^{NAD}} \right)^{n_{GD}} - V_{\max, r}^{GAPD} \frac{BPG}{K_{M\ GAPD}^{BPG}} \left( \frac{NADH}{K_{M\ GAPD}^{NAD}} \right)^{n_{GD}} \right)}{\Delta_{GAPD}} \quad (S87)$$

$$V_{\max, r}^{GAPD} = \frac{V_{\max, f}^{GAPD} K_{M\ GAPD}^{NADH} K_{M\ GAPD}^{BPG}}{K_{M\ GAPD}^{G3P} K_{M\ GAPD}^{NAD} K_{M\ GAPD}^{Pi} K_{GAPD}^{eq}}$$

$$\Delta_{GAPD} = 1 + \frac{G3P}{K_{M\ GAPD}^{GAP}} + \left( \frac{C_T^{Pyr} - NADH}{K_{M\ GAPD}^{NAD}} \right)^{n_{GD}} + \frac{Pi}{K_{M\ GAPD}^{Pi}} + \frac{G3P}{K_{M\ GAPD}^{GAP}} \left( \frac{C_T^{Pyr} - NADH}{K_{M\ GAPD}^{NAD}} \right)^{n_{GD}}$$

$$\dots + \frac{G3P \cdot Pi}{K_{M\ GAPD}^{GAP} K_{M\ GAPD}^{Pi}} \left( \frac{C_T^{Pyr} - NADH}{K_{M\ GAPD}^{NAD}} \right)^{n_{GD}} + \frac{BPG}{K_{M\ GAPD}^{BPG}} + \left( \frac{NADH}{K_{M\ GAPD}^{NAD}} \right)^{n_{GD}} + \frac{BPG}{K_{M\ GAPD}^{BPG}} \left( \frac{NADH}{K_{M\ GAPD}^{NAD}} \right)^{n_{GD}}$$

**Phosphoglycerate kinase (PGK)**

$$V_{PGK} = \frac{\left( V_{\max, f}^{PGK} \frac{BPG}{K_{M\ PGK}^{BPG}} \frac{(C_T^{ad} - ATP)}{K_{M\ PGK}^{ADP}} - V_{\max, r}^{PGK} \frac{3PG}{K_{M\ PGK}^{3PG}} \frac{ATP}{K_{M\ PGK}^{ATP}} \right)}{\Delta_{PGK}} \quad (S88)$$

$$V_{\max, r}^{PGK} = \frac{V_{\max, f}^{PGK} K_{M\ PGK}^{ATP} K_{M\ PGK}^{3PG}}{K_{M\ PGK}^{BPG} K_{M\ PGK}^{ADP} K_{PGK}^{eq}}$$

$$\Delta_{PGK} = 1 + \frac{BPG}{K_{M\ PGK}^{BPG}} + \frac{(C_T^{ad} - ATP)}{K_{M\ PGK}^{ADP}} + \frac{BPG}{K_{M\ PGK}^{BPG}} \frac{(C_T^{ad} - ATP)}{K_{M\ PGK}^{ADP}} +$$

$$\dots + \frac{3PG}{K_{M\ PGK}^{3PG}} + \frac{ATP}{K_{M\ PGK}^{ATP}} + \frac{3PG}{K_{M\ PGK}^{3PG}} \frac{ATP}{K_{M\ PGK}^{ATP}}$$

**Enolase (Enol)**

$$V_{Enol} = \frac{\left( V_{\max,f}^{Enol} \frac{3PG}{K_{M Enol}^{3PG}} - V_{\max,r}^{Enol} \frac{PEP}{K_{M Enol}^{PEP}} \right)}{1 + \frac{3PG}{K_{M Enol}^{3PG}} + \frac{PEP}{K_{M Enol}^{PEP}}} \quad (S89)$$

$$V_{\max,r}^{Enol} = \frac{V_{\max,f}^{Enol} K_{M Enol}^{PEP}}{K_{M Enol}^{3PG} K_{Enol}^{eq}}$$

**Pyruvate kinase (PK)**

$$V_{PK} = \frac{\left( V_{\max,f}^{PK} \frac{(C_T^{ad} - ATP_i) \cdot PEP}{K_{M PK}^{ADP} \cdot K_{M PK}^{PEP}} - V_{\max,r}^{PK} \frac{ATP_i \cdot Py}{K_{M PK}^{ATP} K_{M PK}^{Py} K_{PK}^{eq}} \right) \cdot \left( \frac{1}{1 + L_{PK}} \right)}{1 + \frac{(C_T^{ad} - ATP_i)}{K_{M PK}^{ADP}} + \frac{PEP}{K_{M PK}^{PEP}} + \frac{(C_T^{ad} - ATP_i) \cdot PEP}{K_{M PK}^{ADP} \cdot K_{M PK}^{PEP}} + \frac{ATP_i}{K_{M PK}^{ATP}} + \frac{Py}{K_{M PK}^{Py}} + \frac{ATP_i \cdot Py}{K_{M PK}^{ATP} K_{M PK}^{Py}}}$$

$$L_{PK} = \frac{\left( \frac{1.0 \times 10^{-6.8}}{1.0 \times 10^{-pH}} \right)}{\left( 1 + \frac{PEP}{K_{M PK}^{PEP}} + \frac{Py}{K_{M PK}^{Py}} \right)^4 \left( 1 + \frac{FBP}{K_{M PK}^{FBP}} + \frac{GDP}{K_{M PK}^{GDP}} \right)^4}$$

$$V_{\max,r}^{PK} = \frac{V_{\max,f}^{PK} K_{M PK}^{ATP} K_{M PK}^{Py}}{K_{M PK}^{PEP} K_{M PK}^{ADP}}$$

**Lactate dehydrogenase (LDH)**

$$V_{LDH} = \frac{\left( V_{\max,f}^{LDH} \frac{NADH \cdot Py}{K_{M LDH}^{NADH} \cdot K_{M LDH}^{Py}} - V_{\max,r}^{LDH} \frac{(C_T^{Pyr} - NADH) \cdot Lac}{K_{M LDH}^{NAD} K_{M LDH}^{Lac} K_{LDH}^{eq}} \right)}{1 + \frac{NADH}{K_{M LDH}^{NADH}} + \frac{Py}{K_{M LDH}^{Py}} + \frac{NADH \cdot Py}{K_{M LDH}^{NADH} \cdot K_{M LDH}^{Py}} + \frac{(C_T^{Pyr} - NADH)}{K_{M LDH}^{NAD}} + \frac{Lac}{K_{M LDH}^{Lac}} + \frac{(C_T^{Pyr} - NADH) \cdot Lac}{K_{M LDH}^{NAD} K_{M LDH}^{Lac}}} \quad (S91)$$

$$V_{\max,r}^{LDH} = \frac{V_{\max,f}^{LDH} K_{M LDH}^{NAD} K_{M LDH}^{Lac}}{K_{M LDH}^{Py} K_{M LDH}^{NADH}}$$

1.2.2 Supplementary Table S1. Parameters used in the glycolysis rate expressions

| Symbol              | Value                | Units              | Description                                | Reference                      |
|---------------------|----------------------|--------------------|--------------------------------------------|--------------------------------|
| $k_T^{Glc}$         | 0.053                | s <sup>-1</sup>    | plasmalemmal transport constant of glucose | (Cortassa et al., 2015)        |
| $[Glc]_o$           | 10                   | mM                 | Concentration of extracellular glucose     | (Cortassa et al., 2015)        |
| $V_{max}^{HK}$      | 10.4                 | mM s <sup>-1</sup> | Maximal rate of HK                         | (Cortassa et al., 2015)        |
| $K_{M\ HK}^{Glc}$   | 0.11                 | mM                 | Michaelis constant for glucose             | (Lueck and Fromm, 1974)        |
| $K_{M\ HK}^{ATP}$   | 0.17                 | mM                 | Michaelis constant of HK for ATP           | (Lueck and Fromm, 1974)        |
| $K_{M\ HK}^{G6P}$   | 1.4×10 <sup>-3</sup> | mM                 | Michaelis constant of HK for H6P           | (Lueck and Fromm, 1974)        |
| $K_{M\ HK}^{ADP}$   | 1.2                  | mM                 | Michaelis constant of HK for ADP           | (Lueck and Fromm, 1974)        |
| $K_{HK}^{eq}$       | 7800                 | -                  | Equilibrium constant for HK                | (Lueck and Fromm, 1974)        |
| $V_{max,f}^{PFK}$   | 0.7                  | mM s <sup>-1</sup> | Maximal rate of PFK                        | (Cortassa et al., 2015)        |
| $K_{M\ PFK}^{H6P}$  | 0.18                 | mM                 | Michaelis constant of PFK for H6P          | (Lambeth and Kushmerick, 2002) |
| $K_{M\ PFK}^{ATP}$  | 0.08                 | mM                 | Michaelis constant of PFK for ATP          | (Lambeth and Kushmerick, 2002) |
| $K_{M\ PFK}^{FBP}$  | 4.02                 | mM                 | Michaelis constant of PFK for FBP          | (Lambeth and Kushmerick, 2002) |
| $K_{M\ PFK}^{ADP}$  | 2.7                  | mM                 | Michaelis constant of PFK for ADP          | (Lambeth and Kushmerick, 2002) |
| $K'_{M\ PFK}^{H6P}$ | 20                   | mM                 | Michaelis constant of PFK for H6P          | (Lambeth and Kushmerick, 2002) |
| $K'_{M\ PFK}^{ATP}$ | 0.25                 | mM                 | Michaelis constant of PFK for ATP          | (Lambeth and Kushmerick, 2002) |
| $K'_{M\ PFK}^{FBP}$ | 4.02                 | mM                 | Michaelis constant of PFK for FBP          | (Lambeth and Kushmerick, 2002) |
| $K'_{M\ PFK}^{ADP}$ | 2.7                  | mM                 | Michaelis constant of PFK for ADP          | (Lambeth and Kushmerick, 2002) |
| $L_o$               | 13                   | mM                 | Allosteric constant of PFK for ADP         | (Lambeth and Kushmerick, 2002) |
| $K_{a\ PFK}^{AMP}$  | 0.015                | mM                 | Activation constant of PFK for AMP         | (Lambeth and Kushmerick, 2002) |
| $K_{i\ PFK}^{ATP}$  | 0.87                 | mM                 | Inhibition constant of PFK for ATP         | (Lambeth and Kushmerick, 2002) |
| $K_{i\ PFK}^{Cit}$  | 0.03                 | mM                 | Inhibition constant of PFK for Cit         | (Lambeth and Kushmerick, 2002) |
| $d$                 | 0.01                 |                    | Factor for ATP inhibition of PFK           | (Lambeth and Kushmerick, 2002) |
| $e$                 | 0.01                 |                    | Factor for AMP activation of PFK           | (Lambeth and Kushmerick, 2002) |
| $f$                 | 0.01                 |                    | Factor for citrate inhibition of PFK       | (Lambeth and Kushmerick, 2002) |

| Symbol                  | Value                | Units              | Description                               | Reference                      |
|-------------------------|----------------------|--------------------|-------------------------------------------|--------------------------------|
| $AMP$                   | 0.01                 | mM                 | Concentration of AMP                      | ((Randle and Tubbs, 1979)      |
| $Cit_{cy}$              | 0.01                 | mM                 | Cytoplasmic concentration of Citrate      | (Randle and Tubbs, 1979)       |
| $K_{PFK}^{eq}$          | 242.0                |                    | Equilibrium constant                      | (Lambeth and Kushmerick, 2002) |
| $C_T^{ad}$              | 14.0                 | mM                 | Total adenine nucleotides pool            | (Randle and Tubbs, 1979)       |
| $V_{max}^{ALD}$         | 2.1                  | mM s <sup>-1</sup> | Maximal rate of aldolase                  | (Cortassa et al., 2015)        |
| $K_{M\ ALD}^{FBP}$      | 0.05                 | mM                 | Michaelis constant for FBP                | (Lambeth and Kushmerick, 2002) |
| $K_{M\ ALD}^{FBP}$      | 0.05                 | mM                 | Michaelis constant for FBP                | (Lambeth and Kushmerick, 2002) |
| $K_{M\ ALD}^{G3P}$      | 2.1                  | mM                 | Michaelis constant for GAP                | (Lambeth and Kushmerick, 2002) |
| $K_{ALD}^{eq}$          | 0.12                 |                    | Equilibrium constant                      | (Lambeth and Kushmerick, 2002) |
| $V_{max,(f)(r)}^{GAPD}$ | 4.0                  | mM s <sup>-1</sup> | Maximal rate of GAPD (forward or reverse) | (Cortassa et al., 2015)        |
| $K_{M\ GAPD}^{NAD}$     | 9.0×10 <sup>-3</sup> | mM                 | Michaelis constant for NAD                | (Lambeth and Kushmerick, 2002) |
| $K_{M\ GAPD}^{NADH}$    | 3.3×10 <sup>-3</sup> | mM                 | Michaelis constant for NADH               | (Lambeth and Kushmerick, 2002) |
| $K_{M\ GAPD}^{GAP}$     | 2.5×10 <sup>-3</sup> | mM                 | Michaelis constant for GAP                | (Lambeth and Kushmerick, 2002) |
| $K_{M\ GAPD}^{BPG}$     | 8.0×10 <sup>-4</sup> | mM                 | Michaelis constant for BPG                | (Lambeth and Kushmerick, 2002) |
| $K_{M\ GAPD}^{Pi}$      | 0.29                 | mM                 | Michaelis constant for Pi                 | (Lambeth and Kushmerick, 2002) |
| $Pi$                    | 3.0                  | mM                 | Concentration of phosphate                |                                |
| $nGD$                   | 0.64                 | mM                 | Cooperativity coefficient                 | (Lambeth and Kushmerick, 2002) |
| $C_T^{Pyr}$             | 1.0                  | mM                 | Total pyridine nucleotides pool           | (Randle and Tubbs, 1979)       |
| $K_{GAPD}^{eq}$         | 0.089                |                    | Equilibrium constant                      | (Lambeth and Kushmerick, 2002) |
| $V_{max,(f)(r)}^{PGK}$  | 2.5                  | mM s <sup>-1</sup> | Maximal rate of PGK                       | (Cortassa et al., 2015)        |
| $K_{M\ PGK}^{BPG}$      | 2.2×10 <sup>-3</sup> | mM                 | Michaelis constant of PGK for BPG         | (Lambeth and Kushmerick, 2002) |
| $K_{M\ PGK}^{3PG}$      | 1.2                  | mM                 | Michaelis constant of PGK for 3PG         | (Lambeth and Kushmerick, 2002) |
| $K_{M\ PGK}^{ADP}$      | 8.0×10 <sup>-4</sup> | mM                 | Michaelis constant of PGK for ADP         | (Lambeth and Kushmerick, 2002) |
| $K_{M\ PGK}^{ATP}$      | 0.35                 | mM                 | Michaelis constant of PGK for ATP         | (Lambeth and Kushmerick, 2002) |
| $K_{PGK}^{eq}$          | 57109                |                    | Equilibrium constant                      | (Lambeth and Kushmerick, 2002) |



## Supplementary Material

| Symbol                   | Value                 | Units              | Description                 | Reference                      |
|--------------------------|-----------------------|--------------------|-----------------------------|--------------------------------|
| $V_{\max,(f)(t)}^{Enol}$ | 2.2                   | mM s <sup>-1</sup> | Maximal rate of Enol        | (Cortassa et al., 2015)        |
| $K_{M\ Enol}^{3PG}$      | 0.12                  | mM                 | Michaelis constant for BPG  | (Lambeth and Kushmerick, 2002) |
| $K_{M\ Enol}^{PEP}$      | 0.37                  | mM                 | Michaelis constant for 3PG  | (Lambeth and Kushmerick, 2002) |
| $K_{Enol}^{eq}$          | 0.49                  |                    | Equilibrium constant        | (Lambeth and Kushmerick, 2002) |
| $V_{\max,(f)(t)}^{PK}$   | 416                   | mM s <sup>-1</sup> | Maximal rate of PK          | (Cortassa et al., 2015)        |
| $K_{M\ PK}^{PEP}$        | 0.08                  | mM                 | Michaelis constant for PEP  | (Lambeth and Kushmerick, 2002) |
| $K_{M\ PK}^{Py}$         | 7.05                  | mM                 | Michaelis constant for Py   | (Lambeth and Kushmerick, 2002) |
| $K_{M\ PK}^{ADP}$        | 0.3                   | mM                 | Michaelis constant for ADP  | (Lambeth and Kushmerick, 2002) |
| $K_{M\ PK}^{ATP}$        | 1.13                  | mM                 | Michaelis constant for ATP  | (Lambeth and Kushmerick, 2002) |
| $K_{M\ PK}^{FBP}$        | 0.005                 | mM                 | Michaelis constant for FBP  | (Nishino et al., 2009)         |
| $K_{M\ PK}^{GDP}$        | 0.1                   | mM                 | Michaelis constant for GDP  | (Nishino et al., 2009)         |
| $GDP$                    | 0.1                   | mM                 | Concentration of GDP        | (Nishino et al., 2009)         |
| $K_{PGK}^{eq}$           | 10304                 |                    | Equilibrium constant        | (Lambeth and Kushmerick, 2002) |
| $V_{\max,(f)(t)}^{LDH}$  | 5.4                   | mM s <sup>-1</sup> | Maximal rate of LDH         | (Cortassa et al., 2015)        |
| $K_{M\ LDH}^{NADH}$      | 2.0×10 <sup>-3</sup>  | mM                 | Michaelis constant for NADH | (Lambeth and Kushmerick, 2002) |
| $K_{M\ LDH}^{NAD}$       | 0.849                 | mM                 | Michaelis constant for NAD  | (Lambeth and Kushmerick, 2002) |
| $K_{M\ LDH}^{Py}$        | 3.35×10 <sup>-2</sup> | mM                 | Michaelis constant for Py   | (Lambeth and Kushmerick, 2002) |
| $K_{M\ LDH}^{Lac}$       | 17                    | mM                 | Michaelis constant for BPG  | (Lambeth and Kushmerick, 2002) |
| $K_{LDH}^{eq}$           | 16198                 |                    | Equilibrium constant        | (Lambeth and Kushmerick, 2002) |

### 1.2.3 Glycogenolysis, pentose phosphate and polyol pathways

#### Glycogen debranching enzyme (*Gno\_is*)

$$V_{Gno\_is} = V_{\max}^{Gno\_is} \cdot \frac{Glc_n}{Glc_n + K_{M\ Gno\_is}^{Gno}} \quad (S92)$$

**Glycogen Phosphorylase (GP)**

$$V_{GPa} = \frac{\left( V_{\max,f}^{GPa} \frac{Mal \cdot Pi}{K_{iGPa,f}^{Mal} \cdot K_{MGP}^{Pi}} - V_{\max,r}^{GPa} \frac{Mal \cdot G1P}{K_{aGPa,b}^{Mal} K_{aGPa}^{G1P}} \right)}{1 + \frac{Mal}{K_{iGPa,f}^{Mal}} + \frac{Pi}{K_{iGPa}^{Pi}} + \frac{Mal}{K_{aGPa,b}^{Mal}} + \frac{G1P}{K_{aGPa}^{G1P}} + \frac{Mal}{K_{iGPa,f}^{Mal}} \frac{Pi}{K_{iGPa}^{Pi}} + \frac{Mal}{K_{iGPa,b}^{Mal}} \frac{G1P}{K_{aGPa}^{G1P}}} \quad (S93)$$

$$V_{GPb} = \frac{\left( V_{\max,f}^{GPb} \frac{Mal \cdot Pi}{K_{iGPb,f}^{Mal} \cdot K_{MGPb}^{Pi}} - V_{\max,r}^{GPb} \frac{Mal \cdot G1P}{K_{iGPb,b}^{Mal} K_{iGPb}^{G1P}} \right)}{1 + \frac{Mal}{K_{iGPb,f}^{Mal}} + \frac{Pi}{K_{iGPb}^{Pi}} + \frac{Mal}{K_{iGPb,b}^{Mal}} + \frac{G1P}{K_{iGPb}^{G1P}} + \frac{Mal}{K_{iGPb,f}^{Mal}} \frac{Pi}{K_{iGPb}^{Pi}} + \frac{Mal}{K_{iGPb,b}^{Mal}} \frac{G1P}{K_{iGPb}^{G1P}}} \cdot \left( \frac{AMP^{nH}}{K_{MGPb}^{AMP}} \right) \left( 1 + \frac{AMP^{nH}}{K_{MGPb}^{AMP}} \right) \quad (S94)$$

$$V_{\max,r}^{GP(a)(b)} = \frac{V_{\max,f}^{GP(a)(b)} K_{iGP,b}^{Mal} K_{iGP}^{G1P}}{K_{iGP,f}^{Mal} K_{MGP}^{Pi} K_{GP}^{eq}}$$

**Phosphoglucomutase (PGLM)**

$$V_{PGLM} = V_{\max,f}^{PGLM} \frac{\left( \frac{G1P}{K_{MPGLM}^{G1P}} - \frac{G6P}{K_{MPGLM}^{G1P} K_{PGLM}^{eq}} \right)}{1 + \frac{G1P}{K_{MPGLM}^{G1P}} + \frac{G6P}{K_{MPGLM}^{G6P}}} \quad (S95)$$

**Glucose 6 Phosphate dehydrogenase (G6PD)**

$$V_{G6PD} = \frac{V_{\max}^{G6PD} \frac{H6P \cdot (C_T^{PyP} - NADPH)}{K_{MG6PD}^{H6P} \cdot K_{MG6PD}^{NADP}}}{1 + \frac{(C_T^{PyP} - NADPH)}{K_{MG6PD}^{NADP}} \left( 1 + \frac{H6P}{K_{MG6PD}^{H6P}} \right) + \frac{NADPH}{K_{MG6PD}^{NADPH}} + \frac{ATP}{K_{MG6PD}^{ATP}}} \quad (S96)$$

**6 Phosphogluconate dehydrogenase (6PGO)**

$$V_{6PGO} = E_{6PGO} \cdot \frac{\left( k_1 k_3 k_5 k_7 k_9 (C_T^{PyP} - NADPH) \cdot 6PG - k_2 k_4 k_6 k_8 k_{10} NADPH \cdot Ru5P \right)}{\left( k_2 k_9 (k_4 k_6 + k_5 k_6 + k_5 k_7) + k_1 k_9 (k_4 k_6 + k_5 k_6 + k_5 k_7) (C_T^{PyP} - NADPH) + k_3 k_5 k_7 k_9 \cdot 6PG \right.} \quad (S97)$$

$$\left. \dots + k_2 k_4 k_6 k_8 Ru5P + k_2 k_{10} (k_4 k_6 + k_5 k_6 + k_5 k_7) NADPH + k_1 k_3 (k_5 k_7 + k_5 k_9 + k_6 k_9 \right.$$

$$\left. \dots + k_7 k_9) (C_T^{PyP} - NADPH) \cdot 6PG + k_1 k_4 k_6 k_8 (C_T^{PyP} - NADPH) \cdot Ru5P \right.$$

$$\left. \dots + k_3 k_5 k_7 k_{10} \cdot 6PG \cdot NADPH + k_8 k_{10} (k_2 k_4 + k_2 k_5 + k_2 k_6 + k_4 k_6) \cdot Ru5P \cdot NADPH \right.$$

$$\left. \dots + k_1 k_3 k_8 (k_5 + k_6) (C_T^{PyP} - NADPH) \cdot 6PG \cdot Ru5P + k_3 k_8 k_{10} (k_5 + k_6) \cdot 6PG \cdot Ru5P \cdot NADP \right)$$

**Ribose 5P Isomerase (R5PI)**

$$V_{R5PI} = E_{R5PI} \frac{\left( \frac{k_3 Ru5P}{(k_2 + k_3)} - \frac{k_2 R5P}{(k_2 + k_3)} \right)}{1 + \frac{Ru5P}{k_1} + \frac{R5P}{k_4}} \quad (S98)$$

**Ribulose 5P Epimerase (Ru5PE)**

$$V_{Ru5PE} = E_{Ru5PE} \frac{\left( \frac{k_3 Ru5P}{(k_2 + k_3)} - \frac{k_2 X5P}{(k_2 + k_3)} \right)}{1 + \frac{Ru5P}{k_1} + \frac{X5P}{k_4}} \quad (S99)$$

**Transketolase 1 (TK1)**

$$V_{TK1} = E_{TK1} \cdot \frac{(k_1 k_3 k_5 k_7 \cdot X5P \cdot R5P - k_2 k_4 k_6 k_8 \cdot G3P \cdot S7P)}{\left( k_1 k_3 (k_6 + k_7) \cdot X5P + k_5 k_7 (k_2 + k_3) \cdot R5P + k_2 k_4 (k_6 + k_7) G3P \right.} \quad (S100)$$

$$\left. \begin{aligned} & \dots + k_6 k_8 (k_2 + k_3) S7P + k_1 k_5 (k_3 + k_7) \cdot X5P \cdot R5P \\ & \dots + k_4 k_8 (k_2 + k_6) \cdot G3P \cdot S7P + k_5 k_8 (k_2 + k_3) \cdot R5P \cdot S7P \\ & \dots + k_1 k_4 (k_6 + k_7) \cdot X5P \cdot G3P \end{aligned} \right)$$

**Transaldolase (TAL)**

$$V_{TAL} = E_{TAL} \cdot \frac{(k_1 k_3 k_5 k_7 \cdot G3P \cdot S7P - k_2 k_4 k_6 k_8 \cdot E4P \cdot H6P)}{\left( k_1 k_3 (k_6 + k_7) \cdot S7P + k_5 k_7 (k_2 + k_3) \cdot G3P + k_2 k_4 (k_6 + k_7) E4P \right.} \quad (S101)$$

$$\left. \begin{aligned} & \dots + k_6 k_8 (k_2 + k_3) H6P + k_1 k_5 (k_3 + k_7) \cdot S7P \cdot G3P + k_4 k_8 (k_2 + k_6) \cdot E4P \cdot H6P \\ & \dots + k_5 k_8 (k_2 + k_3) \cdot S7P \cdot H6P + k_1 k_4 (k_6 + k_7) \cdot G3P \cdot E4P \end{aligned} \right)$$

**Transketolase 2 (TK2)**

$$V_{TK2} = E_{TK2} \cdot \frac{(k_1 k_3 k_5 k_7 \cdot X5P \cdot E4P - k_2 k_4 k_6 k_8 \cdot G3P \cdot H6P)}{\left( k_1 k_3 (k_6 + k_7) \cdot X5P + k_5 k_7 (k_2 + k_3) \cdot E4P + k_2 k_4 (k_6 + k_7) G3P \right.} \quad (S102)$$

$$\left. \begin{aligned} & \dots + k_6 k_8 (k_2 + k_3) H6P + k_1 k_5 (k_3 + k_7) \cdot X5P \cdot E4P \\ & \dots + k_4 k_8 (k_2 + k_6) \cdot G3P \cdot H6P + k_5 k_8 (k_2 + k_3) \cdot X5P \cdot H6P + k_1 k_4 (k_6 + k_7) \cdot E4P \cdot G3P \end{aligned} \right)$$

**Aldose Reductase (ALDR)**

$$V_{ALDR} = E_{ALDR} \cdot \frac{\left( k_1 \cdot NADPH \cdot Glc_i - \frac{k_2 \cdot (C_T^{Pyr} - NADPH) \cdot Sor}{K_{ALDR}^{eq}} \right)}{V_{ALDR}^{DENOMINATOR}} \quad (S103)$$

$$V_{ALDR}^{DENOMINATOR} = \left( \begin{aligned} & k_2 k_{ia} k_b + k_2 k_b \cdot NADPH + k_2 k_a Glc_i + \frac{k_1 k_q}{K_{ALDR}^{eq}} Sor + \frac{k_1 k_p}{K_{ALDR}^{eq}} (C_T^{Pyr} - NADPH) \\ & \dots + k_2 \cdot Glc_i \cdot NADPH + \frac{k_1 k_q}{k_{ia} K_{ALDR}^{eq}} Sor \cdot (C_T^{Pyr} - NADPH) \\ & \dots + \frac{k_2 k_a}{k_{iq}} \cdot Glc_i \cdot (C_T^{Pyr} - NADPH) + \frac{k_1}{K_{ALDR}^{eq}} Sor \cdot NADPH \\ & \dots + \frac{k_2}{k_{ip}} \cdot Glc_i \cdot NADPH \cdot Sor + \frac{k_1}{k_{ib} K_{ALDR}^{eq}} Glc_i \cdot (C_T^{Pyr} - NADPH) \cdot Sor \end{aligned} \right)$$

$$V_{ALDR}^{eq} = \frac{k_1 k_p k_{iq}}{k_2 k_b k_{ia}}$$

**Sorbitol dehydrogenase (SoDH)**

$$V_{SoDH} = V_{max,f}^{SoDH} \frac{(C_T^{Pyr} - NADH) \cdot Sor}{K_{iSoDH}^{NAD} \cdot K_{MSoDH}^{Sor} + K_{MSoDH}^{Sor} (C_T^{Pyr} - NADH) + K_{MSoDH}^{NAD} \cdot Sor + (C_T^{Pyr} - NADH) \cdot Sor} \quad (S104)$$

$$\dots - V_{max,r}^{SoDH} \frac{NADH \cdot Fru}{K_{iSoDH}^{NADH} \cdot K_{MSoDH}^{Fru} + K_{MSoDH}^{Fru} \cdot NADH + K_{MSoDH}^{NADH} \cdot Fru + NADH \cdot Fru}$$

$$V_{max,r}^{SoDH} = \frac{V_{max,f}^{SoDH} K_{MSoDH}^{Fru} K_{MSoDH}^{NADH}}{K_{MSoDH}^{Sor} K_{MSoDH}^{NAD} K_{SoDH}^{eq}}$$

**Xylitol dehydrogenase (XyDH)**

$$V_{XyDH} = V_{max,f}^{XyDH} \frac{NADH \cdot X5P}{K_{iXyDH}^{NADH} \cdot K_{MXyDH}^{Xy} + K_{MXyDH}^{Xy} \cdot NADH + K_{MXyDH}^{NADH} \cdot X5P + NADH \cdot X5P} \quad (S105)$$

$$\dots - V_{max,r}^{XyDH} \frac{(C_T^{Pyr} - NADH) \cdot XyOH}{\left( \begin{aligned} & K_{iXyDH}^{NAD} \cdot K_{MXyDH}^{XyOH} + K_{MXyDH}^{XyOH} \cdot (C_T^{Pyr} - NADH) + K_{MXyDH}^{NAD} \cdot XyOH \\ & \dots + (C_T^{Pyr} - NADH) \cdot XyOH \end{aligned} \right)}$$

$$V_{max,r}^{XyDH} = \frac{V_{max,f}^{XyDH} K_{MXyDH}^{XyOH} K_{MXyDH}^{NAD}}{K_{MXyDH}^{Xy} K_{MXyDH}^{NADH} K_{XyDH}^{eq}}$$

**1.2.4 Supplementary Table S2. Parameter values used in the glycogenolysis, pentose phosphate and polyol pathway rate expressions**

| Symbol                  | Value                | Units              | Description                        | Reference                      |
|-------------------------|----------------------|--------------------|------------------------------------|--------------------------------|
| $V_{\max}^{Gno\_is}$    | 0.038                | mM s <sup>-1</sup> | Maximal rate of glycogen breakdown | (Lambeth and Kushmerick, 2002) |
| $K_{M Gno\_is}^{Gno}$   | 5.0                  | mM                 | Michaelis constant for Glycogen    | (Lambeth and Kushmerick, 2002) |
| $Glc_n$                 | 110                  | mM                 | Glycogen levels cardiac muscle     | (Cortassa et al., 2015)        |
| $V_{\max,f}^{PGa}$      | 2.0                  | mM s <sup>-1</sup> | Maximal rate of GPa, forward       | (Cortassa et al., 2015)        |
| $V_{\max,f}^{GPb}$      | 1.25                 | mM s <sup>-1</sup> | Maximal rate of GPb, forward       | (Cortassa et al., 2015)        |
| $K_{iGPa,f}^{Mal}$      | 2.0                  | mM                 | Michaelis constant for Malt        | (Lambeth and Kushmerick, 2002) |
| $K_{aGPa,b}^{Mal}$      | 1.7                  | mM                 | Michaelis constant for Malt        | (Lambeth and Kushmerick, 2002) |
| $K_{aGPa}^{G1P}$        | 10.1                 | mM                 | Michaelis constant for ADP         | (Lambeth and Kushmerick, 2002) |
| $K_{iGPa,b}^{Mal}$      | 0.15                 | mM                 | Michaelis constant for ATP         | (Lambeth and Kushmerick, 2002) |
| $K_{MGPa}^{Pi}$         | 0.4                  | mM                 | Michaelis constant for FBP         | (Lambeth and Kushmerick, 2002) |
| $K_{iGPa}^{Pi}$         | 4.7                  | mM                 | Michaelis constant for GDP         | (Lambeth and Kushmerick, 2002) |
| $K_{iGPb,f}^{Mal}$      | 15                   | mM                 | Michaelis constant for Mal         | (Lambeth and Kushmerick, 2002) |
| $K_{iGPb}^{G1P}$        | 7.4                  | mM                 | Michaelis constant for ADP         | (Lambeth and Kushmerick, 2002) |
| $K_{iGPb,b}^{Mal}$      | 4.4                  | mM                 | Michaelis constant for ATP         | (Lambeth and Kushmerick, 2002) |
| $K_{MGPb}^{Pi}$         | 0.02                 | mM                 | Michaelis constant for FBP         | (Lambeth and Kushmerick, 2002) |
| $K_{iGPb}^{Pi}$         | 4.6                  | mM                 | Michaelis constant for GDP         | (Lambeth and Kushmerick, 2002) |
| $K_{MGPb}^{\prime AMP}$ | 1.9×10 <sup>-6</sup> | mM                 | Activation constant of GPb for AMP | (Lambeth and Kushmerick, 2002) |
| $nH$                    | 1.75                 |                    | Allosteric coefficient for AMP     | (Lambeth and Kushmerick, 2002) |
| $K_{GP}^{eq}$           | 0.42                 |                    | Equilibrium constant               | (Lambeth and Kushmerick, 2002) |
| $V_{\max,f}^{PGLM}$     | 0.14                 | mM s <sup>-1</sup> | Maximal rate of PGLM               | (Cortassa et al., 2015)        |
| $K_{MPGLM}^{G1P}$       | 0.063                | mM                 | Michaelis constant for G1P         | (Lambeth and Kushmerick, 2002) |
| $K_{MPGLM}^{G6P}$       | 0.03                 | mM                 | Michaelis constant for G6P         | (Lambeth and Kushmerick, 2002) |

| Symbol              | Value                 | Units                            | Description                               | Reference                      |
|---------------------|-----------------------|----------------------------------|-------------------------------------------|--------------------------------|
| $K_{PGLM}^{eq}$     | 16.62                 |                                  | Equilibrium constant                      | (Lambeth and Kushmerick, 2002) |
| $V_{max}^{G6PD}$    | 0.004                 | mM s <sup>-1</sup>               | Maximal rate of G6DH (forward or reverse) | (Cortassa et al., 2015)        |
| $K_{MG6PD}^{H6P}$   | 6.67×10 <sup>-3</sup> | mM                               | Michaelis constant for H6P                | (Lambeth and Kushmerick, 2002) |
| $K_{MG6PD}^{NADP}$  | 3.67×10 <sup>-3</sup> | mM                               | Michaelis constant for NADP               | (Lambeth and Kushmerick, 2002) |
| $K_{MG6PD}^{NADPH}$ | 3.12×10 <sup>-3</sup> | mM                               | Michaelis constant for NADPH              | (Lambeth and Kushmerick, 2002) |
| $C_T^{PyP}$         | 0.05                  | mM                               | Total phosphopyridine nucleotides pool    | (Schafer and Buettner, 2001)   |
| $K_{MG6PD}^{ATP}$   | 0.749                 | mM                               | Michaelis constant for BPG                | (Lambeth and Kushmerick, 2002) |
| $E_{6PGO}$          | 0.01                  | mM                               | Maximal concentration of 6PGO             | (Cortassa et al., 2015)        |
| $k_1$               | 2.4×10 <sup>3</sup>   | s <sup>-1</sup>                  | 6PGO rate constant                        | (McIntyre et al., 1989)        |
| $k_2$               | 4.1×10 <sup>2</sup>   | s <sup>-1</sup>                  | 6PGO rate constant                        | (McIntyre et al., 1989)        |
| $k_3$               | 2.0×10 <sup>6</sup>   | mM <sup>-1</sup> s <sup>-1</sup> | 6PGO rate constant                        | (McIntyre et al., 1989)        |
| $k_4$               | 26                    | mM <sup>-1</sup> s <sup>-1</sup> | 6PGO rate constant                        | (McIntyre et al., 1989)        |
| $k_5$               | 48.0                  | s <sup>-1</sup>                  | 6PGO rate constant                        | (McIntyre et al., 1989)        |
| $k_6$               | 30.0                  | s <sup>-1</sup>                  | 6PGO rate constant                        | (McIntyre et al., 1989)        |
| $k_7$               | 6.3×10 <sup>2</sup>   | s <sup>-1</sup>                  | 6PGO rate constant                        | (McIntyre et al., 1989)        |
| $k_8$               | 36                    | mM <sup>-1</sup> s <sup>-1</sup> | 6PGO rate constant                        | (McIntyre et al., 1989)        |
| $k_9$               | 8.0×10 <sup>2</sup>   | s <sup>-1</sup>                  | 6PGO rate constant                        | (McIntyre et al., 1989)        |
| $k_{10}$            | 2.25×10 <sup>2</sup>  | mM <sup>-1</sup> s <sup>-1</sup> | 6PGO rate constant                        | (McIntyre et al., 1989)        |
| $E_{R5PI}$          | 0.0036                | mM                               | Maximal concentration of R5PI             | (Cortassa et al., 2015)        |
| $k_1$               | 60.9                  | mM <sup>-1</sup> s <sup>-1</sup> | R5PI rate constant                        | (McIntyre et al., 1989)        |
| $k_2$               | 33.3                  | s <sup>-1</sup>                  | R5PI rate constant                        | (McIntyre et al., 1989)        |
| $k_3$               | 14.2                  | mM <sup>-1</sup> s <sup>-1</sup> | R5PI rate constant                        | (McIntyre et al., 1989)        |
| $k_4$               | 21.6                  | mM <sup>-1</sup> s <sup>-1</sup> | R5PI rate constant                        | (McIntyre et al., 1989)        |
| $E_{Ru5PE}$         | 0.034                 | mM                               | Maximal concentration of Ru5PE            | (Cortassa et al., 2015)        |

## Supplementary Material

| Symbol    | Value              | Units                         | Description                  | Reference               |
|-----------|--------------------|-------------------------------|------------------------------|-------------------------|
| $k_1$     | $3.91 \times 10^3$ | $\text{mM}^{-1}\text{s}^{-1}$ | Ru5PE rate constant          | (McIntyre et al., 1989) |
| $k_2$     | $4.38 \times 10^2$ | $\text{s}^{-1}$               | Ru5PE rate constant          | (McIntyre et al., 1989) |
| $k_3$     | $3.05 \times 10^2$ | $\text{s}^{-1}$               | Ru5PE rate constant          | (McIntyre et al., 1989) |
| $k_4$     | $1.49 \times 10^3$ | $\text{mM}^{-1}\text{s}^{-1}$ | Ru5PE rate constant          | (McIntyre et al., 1989) |
| $E_{TK1}$ | 0.0027             | mM                            | Maximal concentration of TK1 | (Cortassa et al., 2015) |
| $k_1$     | $2.16 \times 10^2$ | $\text{mM}^{-1}\text{s}^{-1}$ | TK1 rate constant            | (McIntyre et al., 1989) |
| $k_2$     | 38.0               | $\text{s}^{-1}$               | TK1 rate constant            | (McIntyre et al., 1989) |
| $k_3$     | 34.0               | $\text{s}^{-1}$               | TK1 rate constant            | (McIntyre et al., 1989) |
| $k_4$     | $1.56 \times 10^2$ | $\text{mM}^{-1}\text{s}^{-1}$ | TK1 rate constant            | (McIntyre et al., 1989) |
| $k_5$     | $3.29 \times 10^2$ | $\text{mM}^{-1}\text{s}^{-1}$ | TK1 rate constant            | (McIntyre et al., 1989) |
| $k_6$     | $1.75 \times 10^2$ | $\text{s}^{-1}$               | TK1 rate constant            | (McIntyre et al., 1989) |
| $k_7$     | 40                 | $\text{s}^{-1}$               | TK1 rate constant            | (McIntyre et al., 1989) |
| $k_8$     | 44.8               | $\text{mM}^{-1}\text{s}^{-1}$ | TK1 rate constant            | (McIntyre et al., 1989) |
| $E_{TAL}$ | 0.058              | mM                            | Maximal concentration of TAL | (Cortassa et al., 2015) |
| $k_1$     | $2.16 \times 10^2$ | $\text{mM}^{-1}\text{s}^{-1}$ | TAL rate constant            | (McIntyre et al., 1989) |
| $k_2$     | 4.53               | $\text{s}^{-1}$               | TAL rate constant            | (McIntyre et al., 1989) |
| $k_3$     | 16.3               | $\text{s}^{-1}$               | TAL rate constant            | (McIntyre et al., 1989) |
| $k_4$     | 30.0               | $\text{mM}^{-1}\text{s}^{-1}$ | TAL rate constant            | (McIntyre et al., 1989) |
| $k_5$     | $4.9 \times 10^2$  | $\text{mM}^{-1}\text{s}^{-1}$ | TAL rate constant            | (McIntyre et al., 1989) |
| $k_6$     | 60.0               | $\text{s}^{-1}$               | TAL rate constant            | (McIntyre et al., 1989) |
| $k_7$     | 17.0               | $\text{s}^{-1}$               | TAL rate constant            | (McIntyre et al., 1989) |
| $k_8$     | 79.0               | $\text{mM}^{-1}\text{s}^{-1}$ | TAL rate constant            | (McIntyre et al., 1989) |
| $E_{TK2}$ | 0.005              | mM                            | Maximal concentration of TK2 | (Cortassa et al., 2015) |
| $k_1$     | $2.16 \times 10^2$ | $\text{mM}^{-1}\text{s}^{-1}$ | TK2 rate constant            | (McIntyre et al., 1989) |
| $k_2$     | 38.0               | $\text{s}^{-1}$               | TK2 rate constant            | (McIntyre et al., 1989) |

| Symbol              | Value                 | Units           | Description                          | Reference                    |
|---------------------|-----------------------|-----------------|--------------------------------------|------------------------------|
| $k_3$               | 34.0                  | $s^{-1}$        | TK2 rate constant                    | (McIntyre et al., 1989)      |
| $k_4$               | $1.56 \times 10^2$    | $mM^{-1}s^{-1}$ | TK2 rate constant                    | (McIntyre et al., 1989)      |
| $k_5$               | $3.29 \times 10^2$    | $mM^{-1}s^{-1}$ | TK2 rate constant                    | (McIntyre et al., 1989)      |
| $k_6$               | $1.75 \times 10^2$    | $s^{-1}$        | TK2 rate constant                    | (McIntyre et al., 1989)      |
| $k_7$               | 40                    | $s^{-1}$        | TK2 rate constant                    | (McIntyre et al., 1989)      |
| $k_8$               | 44.8                  | $mM^{-1}s^{-1}$ | TK2 rate constant                    | (McIntyre et al., 1989)      |
| $E_{ALDR}$          | $3.4 \times 10^{-5}$  | mM              | Maximal concentration of ALDR        | (Cortassa et al., 2015)      |
| $k_1$               | 0.33                  | $s^{-1}$        | ALDR rate constant                   | (Kubiseski et al., 1992)     |
| $k_2$               | 0.037                 | $s^{-1}$        | ALDR rate constant                   | (Kubiseski et al., 1992)     |
| $k_a$               | $6.9 \times 10^{-4}$  | mM              | ALDR Michaelis constant for NADPH    | (Kubiseski et al., 1992)     |
| $k_b$               | 46                    | mM              | ALDR Michaelis constant for Glc      | (Kubiseski et al., 1992)     |
| $k_p$               | $3.8 \times 10^2$     | mM              | ALDR Michaelis constant for Sor      | (Kubiseski et al., 1992)     |
| $k_q$               | $1.5 \times 10^{-2}$  | mM              | ALDR Michaelis constant for NADP     | (Kubiseski et al., 1992)     |
| $k_{ia}$            | $4.1 \times 10^{-4}$  | mM              | ALDR dissociation constant for NADPH | (Kubiseski et al., 1992)     |
| $k_{ib}$            | $9.2 \times 10^{-2}$  | mM              | ALDR dissociation constant for Glc   | (Kubiseski et al., 1992)     |
| $k_{ip}$            | $1.3 \times 10^3$     | mM              | ALDR dissociation constant for Sor   | (Kubiseski et al., 1992)     |
| $k_{iq}$            | $8.3 \times 10^{-3}$  | mM              | ALDR dissociation constant for NADP  | (Kubiseski et al., 1992)     |
| $V_{max,f}^{SoDH}$  | $6.0 \times 10^{-4}$  | $mM s^{-1}$     | Maximal concentration of SoDH        | (Cortassa et al., 2015)      |
| $K_{M SoDH}^{NADH}$ | $1.0 \times 10^{-2}$  | mM              | SoDH Michaelis constant for NADH     | (Karacaoglan and Ozer, 2005) |
| $K_{M SoDH}^{Fru}$  | $1.0 \times 10^3$     | mM              | SoDH Michaelis constant for Fru      | (Karacaoglan and Ozer, 2005) |
| $K_{M SoDH}^{Sor}$  | 9.6                   | mM              | SoDH Michaelis constant for Sor      | (Karacaoglan and Ozer, 2005) |
| $K_{M SoDH}^{NAD}$  | 2.0                   | mM              | SoDH Michaelis constant for NAD      | (Karacaoglan and Ozer, 2005) |
| $K_{i SoDH}^{NADH}$ | $1.0 \times 10^{-2}$  | mM              | SoDH dissociation constant for NADH  | (Karacaoglan and Ozer, 2005) |
| $K_{i SoDH}^{NAD}$  | 2.0                   | mM              | SoDH dissociation constant for NAD   | (Karacaoglan and Ozer, 2005) |
| $K_{SoDH}^{eq}$     | $9.25 \times 10^{-2}$ |                 | SoDH equilibrium constant            | (Karacaoglan and Ozer, 2005) |



| Symbol              | Value                 | Units              | Description                        | Reference                    |
|---------------------|-----------------------|--------------------|------------------------------------|------------------------------|
| $V_{\max, f}^{XDH}$ | 0.3                   | mM s <sup>-1</sup> | Maximal concentration of XDH       | (Cortassa et al., 2015)      |
| $K_{M XDH}^{NADH}$  | 1.0×10 <sup>-2</sup>  | mM                 | XDH Michaelis constant for NADH    | (Karacaoglan and Ozer, 2005) |
| $K_{M XDH}^{XyOH}$  | 8.08×10 <sup>-1</sup> | mM                 | XDH Michaelis constant for XyOH    | (O'Brien et al., 1983)       |
| $K_{M XDH}^{Xy}$    | 20.0                  | mM                 | XDH Michaelis constant for X5P     | (O'Brien et al., 1983)       |
| $K_{M XDH}^{NAD}$   | 2.0                   | mM                 | XDH Michaelis constant for NAD     | (Karacaoglan and Ozer, 2005) |
| $K_{i XDH}^{NADH}$  | 1.0×10 <sup>-2</sup>  | mM                 | XDH dissociation constant for NADH | (Karacaoglan and Ozer, 2005) |
| $K_{i XDH}^{NAD}$   | 2.0                   | mM                 | XDH dissociation constant for NAD  | (Karacaoglan and Ozer, 2005) |
| $K_{XDH}^{eq}$      | 0.24                  |                    | XDH equilibrium constant           | (Karacaoglan and Ozer, 2005) |

### 2.5.5. ATPase, non-glycolytic NADH consumption, NADPH consumption, polyol transport

The rate expressions corresponding to NADH, NADPH and ATP consumption as well as polyol transport have been added to the present computational model to enable steady state behavior. Standard hyperbolic relations were assumed for each of the rate expressions.

$$V_{ATPase} = V_{\max}^{ATPase} \frac{ATP}{K_{M ATPase}^{ATP} + ATP} \quad (S106)$$

$$V_{NADHc} = V_{\max}^{NADHc} \cdot \frac{\frac{NADH}{K_{M NADHc}^{NADH}} - \frac{(C_T^{Pyr} - NADH)}{K_{M NADHc}^{NAD}}}{1 + \frac{NADH}{K_{M NADHc}^{NADH}} + \frac{(C_T^{Pyr} - NADH)}{K_{M NADHc}^{NAD}}} \quad (S107)$$

$$V_{NADPHc} = V_{\max}^{NADPHc} \cdot \frac{\frac{NADPH}{K_{M NADPHc}^{NADPH}} - \frac{(C_T^{PyP} - NADPH)}{K_{M NADPHc}^{NADP}}}{1 + \frac{NADPH}{K_{M NADPHc}^{NADPH}} + \frac{(C_T^{PyP} - NADPH)}{K_{M NADPHc}^{NADP}}} \quad (S108)$$

$$V_{FruT} = k_{FruT} \frac{Fru}{K_{FruT}^{Fru} + Fru} \quad (S109)$$

$$V_{XyOHT} = k_{XyOHT} \frac{XyOH}{K_{XyOHT}^{XyOH} + XyOH} \quad (S110)$$

### 1.2.5 Supplementary Table S3. Parameters of ATP hydrolysis, NAD(P)H consumption and polyol transport reactions

| Symbol              | Value                | Units              | Description                       |
|---------------------|----------------------|--------------------|-----------------------------------|
| $V_{\max}^{ATPase}$ | 3.0                  | mM s <sup>-1</sup> | Maximal Rate of ATPase            |
| $K_M^{ATPase}$      | 9.0                  | mM                 | Michaelis constant for ATP        |
| $V_{\max}^{NADHc}$  | 0.2                  | mM s <sup>-1</sup> | Maximal rate of NADH consumption  |
| $K_M^{NADHc}$       | 0.05                 | mM                 | Michaelis constant for NADH       |
| $K_M^{NADc}$        | 0.7                  | mM                 | Michaelis constant for NAD        |
| $V_{\max}^{NADPHc}$ | 320                  | mM s <sup>-1</sup> | Maximal rate of NADPH consumption |
| $K_M^{NADPHc}$      | $2.5 \times 10^{-2}$ | mM                 | Michaelis constant for NADPH      |
| $K_M^{NADPc}$       | $7.5 \times 10^{-3}$ | mM                 | Michaelis constant for NADP       |
| $k_{FruT}$          | 0.001                | mM s <sup>-1</sup> | Rate constant of Fru transport    |
| $K_{FruT}^{Fru}$    | 3.0                  | mM                 | Michaelis constant for Fru        |
| $k_{XyOHT}$         | 0.005                | mM s <sup>-1</sup> | Rate constant of XyOH transport   |
| $K_{XyOHT}^{XyOH}$  | $1.5 \times 10^{-5}$ | mM                 | Michaelis constant for XyOH       |

### 1.2.6 Rate equations of mitochondrial energy metabolism

The equations and parameters reproduced in this and the following sections are from our previous work (Wei et al., 2011; Kembro et al., 2013a; Cortassa et al., 2017a; 2017b). Details about the model parameterization are based on the original publications above mentioned.

#### Pyruvate carrier (PyrC)

$$V_{PyrC} = \frac{1}{1 + \frac{[H^+]_m}{k_{h,1pc}}} \frac{V_{\max}^{PC} [Pyr]_c}{[Pyr]_c + K_{M\_Pyr}^{Pyr}} \quad (S111)$$

**Pyruvate dehydrogenase (PDH)**

$$V_{PDH} = \frac{V_{PDH}^{\max} \alpha_{PDH} \left( \frac{NAD^+}{K_{M\_PDH}^{NAD}} \right) \left( \frac{Pyr}{K_{M\_PDH}^{Pyr}} \right) \left( \frac{CoA}{K_{M\_PDH}^{CoA}} \right)}{\left( 1 + \frac{Pyr}{K_{M\_PDH}^{Pyr}} \right) \left( \frac{1 + \frac{CoA}{K_{M\_PDH}^{CoA}} + \frac{CoA_T}{K_{D\_PDH}^{CoA}} \left( 1 + \frac{CoA}{CoA_T} \right)}{1 + \frac{NAD^+}{K_{M\_PDH}^{NAD}} + \frac{NAD_T}{K_{D\_PDH}^{NAD}} \left( 1 + \frac{NAD^+}{NAD_T} \right)} \right)} \quad (S112)$$

$$\alpha_{PDH} = \frac{\left( 1 + \frac{Ca_m^{2+}}{K_{DP}^{Ca}} \right) \left( \left( \frac{NAD^+}{NADH} \right)^{n\_NAD} F_{DP\_NAD} + 1 \right)}{\left( \left( 1 + \frac{Ca_m^{2+}}{K_{DP}^{Ca}} \right) \left( \left( \frac{NAD^+}{NADH} \right)^{n\_NAD} F_{DP\_NAD} + 1 \right) \right.}$$

$$\left. \dots + \left( 1 + \frac{ATP}{K_{PDK}^{ATP}} \right) \left( 1 + \frac{K_{PDK}^{ADP}}{ADP} \right) \left( 1 + \frac{K_{PDK}^{Pyr}}{Pyr} \right) \left( \left( \frac{AcCoA}{CoA} \right)^{n\_CoA} F_{PDK\_AcCoA} + 1 \right) \right)$$

**Pyruvate carboxylase (PyrCb)**

$$V_{PyrCb} = \frac{1}{1 + \frac{[H^+]_m}{k_{h,1p}} + \frac{k_{h,2p}}{[H^+]_m}} \frac{V_{\max}^{PyrCb} [Pyr]_m \cdot [MgATP^{-2}]_m}{K_{M\_PyrCb}^{Pyr} [MgATP^{-2}] + [Pyr]_m \cdot K_{M\_PyrCb}^{MgATP} + [Pyr]_m \cdot [MgATP^{-2}]} \quad (S113)$$

**Citrate synthase (CS)**

$$V_{CS} = \frac{k_{cat}^{CS} E_T^{CS}}{\left( 1 + \frac{K_M^{AcCoA}}{[AcCoA]} \right) \left( 1 + \frac{K_M^{OAA}}{[OAA]} \right)} \quad (S114)$$

**Aconitase (ACO)**

$$V_{ACO} = k_f^{ACO} \left( [CIT] - \frac{[ISOC]}{K_E^{ACO}} \right) \quad (S115)$$

**Isocitrate dehydrogenase (IDH)**

$$V_{IDH} = k_{cat}^{IDH} E_T^{IDH} \left[ \left( 1 + \frac{[H^+]_m}{k_{h,1}} + \frac{k_{h,2}}{[H^+]_m} \right) + f_i^{IDH} \left( \frac{K_{Midh}^{NAD}}{[NAD]} \right) + \dots \right]^{-1} \quad (S116)$$

$$\left[ f_a^{IDH} \left( \frac{K_M^{ISOC}}{[ISOC]} \right)^{ni} + f_a^{IDH} f_i^{IDH} \left( \frac{K_M^{ISOC}}{[ISOC]} \right)^{ni} \left( \frac{K_{Midh}^{NAD}}{[NAD]} \right) \right]$$

$$f_a^{IDH} = \left[ \left( 1 + \frac{[ADP^{3-}]_m}{K_{ADP}^a} \right) \left( 1 + \frac{[Ca^{2+}]_m}{K_{Ca}^a} \right) \right]^{-1}$$

$$f_i^{IDH} = \left( 1 + \frac{[NADH]}{K_{i,NADH}} \right)$$

### ***α*-ketoglutarate dehydrogenase (KGDH)**

$$V_{KGDH} = \frac{k_{cat}^{KGDH} E_T^{KGDH}}{1 + \frac{[H^+]_m}{k_{h,1a}} + \frac{k_{h,2a}}{[H^+]_m} + f_a^{KGDH} \left( \frac{k_M^{\alpha KG}}{[\alpha KG]} \right)^{n_{\alpha KG}} + f_a^{KGDH} \frac{k_M^{NAD}}{[NAD]}} \quad (S117)$$

$$f_a^{KGDH} = \left[ \left( 1 + \frac{[Mg^{2+}]}{K_D^{Mg^{2+}}} \right) \left( 1 + \frac{[Ca^{2+}]_m}{K_D^{Ca^{2+}}} \right) \right]^{-1}$$

### **Succinate lyase (SL)**

$$V_{SL} = k_f^{SL} \left( [SCoA][ADP]_m [Pi]_m - \frac{[Suc][ATP]_m [CoA]}{K_{E,app}^{SL}} \right) \quad (S118)$$

$$K_{E,app}^{SL} = K_{Eq}^{SL} \frac{P_{SUC} P_{ATP}}{P_{Pi} P_{ADP}}$$

### **Succinate dehydrogenase (SDH, CII\_SDH)**

$$V_{O_2SDH} = 0.5 \rho^{res(SDH)} \frac{\left( r_a + r_{c1} e^{\left( \frac{4F\Delta\Psi_B}{RT} \right)} \right) e^{\left( \frac{FA_{RSDH}}{RT} \right)} - r_a e^{\left( \frac{g4F\Delta\mu_H}{RT} \right)} + r_{c2} e^{\left( \frac{FA_{RSDH}}{RT} \right)} e^{\left( \frac{g4F\Delta\mu_H}{RT} \right)}}{\left( 1 + r_1 e^{\left( \frac{FA_{RSDH}}{RT} \right)} \right) e^{\left( \frac{4F\Delta\Psi_B}{RT} \right)} + \left( r_2 + r_3 e^{\left( \frac{FA_{RSDH}}{RT} \right)} \right) e^{\left( \frac{g4F\Delta\mu_H}{RT} \right)}} \left( \frac{1}{1 + \frac{[OAA]}{K_i^{OAA}}} \right) \quad (S119)$$

$$A_{RSDH} = \frac{RT}{F} \ln \left( K_{RSDH,app} \sqrt{\frac{[SUC]}{[FUM]}} \right)$$

$$K_{RSDH,app} = \frac{K_{res(SDH)}}{P_{SUC}}$$

**Fumarate hydratase (FH)**

$$V_{FH} = k_f^{FH} \left( [FUM] - \frac{[MAL]}{K_E^{FH}} \right) \quad (S120)$$

**Malate dehydrogenase (MDH)**

$$V_{MDH} = \frac{k_{cat}^{MDH} E_T^{MDH} f_{h,a} f_{h,i}}{1 + \frac{K_M^{MAL}}{[MAL]} \left( 1 + \frac{[OAA]}{K_i^{OAA}} \right) + \frac{K_M^{NAD}}{[NAD]} + \frac{K_M^{MAL}}{[MAL]} \left( 1 + \frac{[OAA]}{K_i^{OAA}} \right) \frac{K_M^{NAD}}{[NAD]}} \quad (S121)$$

$$f_{h,a} = \left( 1 + \frac{[H^+]}{k_{h1}} + \frac{[H^+]^2}{k_{h1}k_{h2}} \right)^{-1} + k_{offset}$$

$$f_{h,i} = \left( 1 + \frac{k_{h3}}{[H^+]} + \frac{k_{h3}k_{h4}}{[H^+]^2} \right)$$

**Aspartate amino transferase (AAT)**

$$V_{AAT} = k_f^{AAT} [OAA][GLU] \frac{k_{ASP} K_E^{AAT}}{\left( k_{ASP} K_E^{AAT} + [\alpha KG] k_f^{AAT} \right)} \quad (122)$$

**1.2.7 Supplementary Table S4. Parameter values of the tricarboxylic acid cycle**

| Symbol             | Value                | Units  | Description                                 | References                                       |
|--------------------|----------------------|--------|---------------------------------------------|--------------------------------------------------|
| $V_{max}^{PC}$     | 0.4125               | mM s-1 | Pyruvate carrier (PC) maximal rate          | (Cortassa et al., 2017b)(Cortassa et al., 2017b) |
| $K_{M\_PC}^{Pyr}$  | 0.15                 | mM     | PC Michaelis constant for Pyr               | (Halestrap, 1978)                                |
| $k_{h,1pc}$        | $7.5 \times 10^{-6}$ |        | PC ionization constant                      | (Halestrap, 1978)                                |
| $V_{PDH}^{max}$    | 7.5                  | mM s-1 | PDH maximal rate                            | (Cortassa et al., 2017b)                         |
| $K_{M\_PDH}^{NAD}$ | 0.05                 | mM     | Michaelis constant ( $K_M$ ) of PDH for NAD | (Pettit et al., 1975)                            |
| $K_{M\_PDH}^{Pyr}$ | 0.1                  | mM     | $K_M$ of PDH for pyruvate                   | (Cortassa et al., 2017b)                         |
| $K_{M\_PDH}^{CoA}$ | 0.006                | mM     | $K_M$ of PDH for Coenzyme A (CoA)           | (Pettit et al., 1975)                            |

| Symbol               | Value                 | Units              | Description                                     | References               |
|----------------------|-----------------------|--------------------|-------------------------------------------------|--------------------------|
| $K_{D\_PDH}^{CoA}$   | 0.03                  | mM                 | Dissociation constant for CoA                   | (Pettit et al., 1975)    |
| $K_{D\_PDH}^{NAD}$   | 0.04                  | mM                 | Dissociation constant for NAD                   | (Pettit et al., 1975)    |
| $K_{DP}^{Ca}$        | 0.001                 | mM                 | Activation constant of PDP for Ca <sup>2+</sup> | (Cortassa et al., 2017b) |
| $K_{PDK}^{ATP}$      | 0.2                   | mM                 | Activation constant of PDK for ATP              | (Cortassa et al., 2017b) |
| $K_{PDK}^{ADP}$      | 0.05                  | mM                 | Inhibition constant of PDK for ADP              | (Cortassa et al., 2017b) |
| $K_{PDK}^{Pyr}$      | 0.1                   | mM                 | Inhibition constant of PDK for pyruvate         | (Cortassa et al., 2017b) |
| $F_{DP\_NAD}$        | 6.7                   | -                  | NADH inhibitory factor of PDP                   | (Cortassa et al., 2017b) |
| $F_{PDK\_AcCoA}$     | 5.3                   | -                  | AcCoA activation factor of PDK                  | (Cortassa et al., 2017b) |
| $n\_NAD$             | 0.2                   | -                  | Exponential coefficient of NADH/NAD ratio       | (Cortassa et al., 2017b) |
| $n\_CoA$             | 0.6                   | -                  | Exponential coefficient of AcCoA/CoA ratio      | (Cortassa et al., 2017b) |
| $V_{max}^{PCb}$      | 0.5                   | mM.s <sup>-1</sup> | Maximal rate of Pyr carboxylase (PyrCb)         |                          |
| $K_{M\_PCb}^{Pyr}$   | 0.23                  | mM                 | PyrCb Michaelis constant for Pyr                | (Rowan et al., 1978)     |
| $K_{M\_PCb}^{MgATP}$ | 0.25                  | mM                 | PyrCb Michaelis constant for MgATP              | (Rowan et al., 1978)     |
| $k_{h,1p}$           | $2.51 \times 10^{-5}$ | mM                 | PyrCb ionization constant                       | (Rowan et al., 1978)     |
| $k_{h,2p}$           | $1.26 \times 10^{-5}$ | mM                 | PyrCb ionization constant                       | (Rowan et al., 1978)     |
| $k_{cat}^{CS}$       | $2.35 \times 10^{-4}$ | ms <sup>-1</sup>   | Catalytic constant of citrate synthase (CS)     | (Cortassa et al., 2006)  |
| $E_T^{CS}$           | 0.4                   | mM                 | CS concentration                                | (Cortassa et al., 2006)  |
| $K_M^{AcCoA}$        | 0.0126                | mM                 | CS Michaelis constant for AcCoA                 | (Cortassa et al., 2006)  |
| $K_M^{OAA}$          | $6.4 \times 10^{-4}$  | mM                 | CS Michaelis constant for OAA                   | (Cortassa et al., 2006)  |
| $C_{kint}$           | 1.3                   | mM                 | Sum of TCA cycle intermediates                  | (Cortassa et al., 2006)  |
| $C_{PN}$             | 1.0                   | mM                 | Sum of pyridine nucleotides                     | (Cortassa et al., 2006)  |
| $k_f^{ACO}$          | $1.17 \times 10^{-4}$ | ms <sup>-1</sup>   | Forward rate constant of aconitase (ACO)        | (Cortassa et al., 2006)  |
| $K_E^{ACO}$          | 2.22                  |                    | ACO equilibrium constant                        | (Cortassa et al., 2006)  |
| $K_{i,NADH}$         | 0.19                  | mM                 | Inhibition constant by NADH                     | (Cortassa et al., 2006)  |
| $k_{cat}^{IDH}$      | 1.188                 | ms <sup>-1</sup>   | Rate constant of isocitrate dehydrogenase (IDH) | (Cortassa et al., 2006)  |

| Symbol              | Value                  | Units             | Description                                                    | References              |
|---------------------|------------------------|-------------------|----------------------------------------------------------------|-------------------------|
| $E_T^{IDH}$         | 0.109                  | mM                | IDH concentration                                              | (Cortassa et al., 2006) |
| $k_{h,1}$           | $1 \times 10^{-5}$     | mM                | IDH ionization constant                                        | (Cortassa et al., 2006) |
| $k_{h,2}$           | $9 \times 10^{-4}$     | mM                | IDH ionization constant                                        | (Cortassa et al., 2006) |
| $K_M^{ISOC}$        | 1.52                   | mM                | IDH Michaelis constant for isocitrate                          | (Cortassa et al., 2006) |
| $n_i$               | 2.0                    |                   | IDH cooperativity for isocitrate                               | (Cortassa et al., 2006) |
| $K_{Midh}^{NAD}$    | 0.923                  | mM                | Michaelis constant for $NAD^+$                                 | (Cortassa et al., 2006) |
| $K_{ADP}^a$         | 0.62                   | mM                | Activation constant by ADP                                     | (Cortassa et al., 2006) |
| $K_{Ca}^a$          | $5 \times 10^{-4}$     | mM                | IDH activation constant for $Ca^{2+}$                          | (Cortassa et al., 2006) |
| $E_T^{KGDH}$        | 0.5                    | mM                | $\alpha$ -ketoglutarate dehydrogenase (KGDH) concentration     | (Cortassa et al., 2006) |
| $k_{cat}^{KGDH}$    | 0.0132                 | $ms^{-1}$         | KGDH rate constant                                             | (Cortassa et al., 2006) |
| $k_M^{\alpha KG}$   | 30                     | mM                | KGDH Michaelis constant for alpha-ketoglutarate ( $\alpha$ KG) | (Cortassa et al., 2006) |
| $K_{M\_kgdh}^{NAD}$ | 38.7                   | mM                | KGDH Michaelis constant for $NAD^+$                            | (Cortassa et al., 2006) |
| $k_{h,1a}$          | $4 \times 10^{-5}$     | mM                | KGDH ionization constant                                       | (Cortassa et al., 2006) |
| $k_{h,2a}$          | $7 \times 10^{-5}$     | mM                | KGDH ionization constant                                       | (Cortassa et al., 2006) |
| $K_D^{Mg^{2+}}$     | 0.0308                 | mM                | Activation constant for $Mg^{2+}$                              | (Cortassa et al., 2006) |
| $K_D^{Ca^{2+}}$     | $1.5 \times 10^{-4}$   | mM                | Activation constant for $Ca^{2+}$                              | (Cortassa et al., 2006) |
| $n_{\alpha KG}$     | 1.2                    |                   | KGDH Hill coefficient for $\alpha$ KG                          | (Cortassa et al., 2006) |
| $[Mg^{2+}]_m$       | 0.4                    | mM                | $Mg^{2+}$ concentration in mitochondria                        | (Cortassa et al., 2006) |
| $k_f^{SL}$          | $2.8 \times 10^{-3}$   | $mM^{-1} ms^{-1}$ | Forward rate constant of succinate lyase (SL)                  | (Cortassa et al., 2006) |
| $K_E^{SL}$          | 3.115                  |                   | SL equilibrium constant                                        | (Cortassa et al., 2006) |
| $k_f^{FH}$          | $8.3 \times 10^{-3}$   | $ms^{-1}$         | Forward rate constant for fumarate hydratase (FH)              | (Cortassa et al., 2006) |
| $K_E^{FH}$          | 1.0                    |                   | FH equilibrium constant                                        | (Cortassa et al., 2006) |
| $k_{h1}$            | $1.131 \times 10^{-5}$ | mM                | Ionization constant of malate dehydrogenase (MDH)              | (Cortassa et al., 2006) |
| $k_{h2}$            | 26.7                   | mM                | MDH ionization constant                                        | (Cortassa et al., 2006) |

| Symbol          | Value                 | Units            | Description                                                | References              |
|-----------------|-----------------------|------------------|------------------------------------------------------------|-------------------------|
| $k_{h3}$        | $6.68 \times 10^{-9}$ | mM               | MDH ionization constant                                    | (Cortassa et al., 2006) |
| $k_{h4}$        | $5.62 \times 10^{-6}$ | mM               | MDH ionization constant                                    | (Cortassa et al., 2006) |
| $k_{offset}$    | $3.99 \times 10^{-2}$ |                  | Offset of MDH pH activation factor                         | (Cortassa et al., 2006) |
| $k_{cat}^{MDH}$ | 0.1242                | ms <sup>-1</sup> | MDH rate constant                                          | (Cortassa et al., 2006) |
| $E_T^{MDH}$     | 0.154                 | mM               | Total MDH concentration                                    | (Cortassa et al., 2006) |
| $K_M^{MAL}$     | 1.493                 | mM               | MDH Michaelis constant for malate                          | (Cortassa et al., 2006) |
| $K_i^{OAA}$     | 0.031                 | mM               | Inhibition constant for oxalacetate                        | (Cortassa et al., 2006) |
| $K_M^{NAD}$     | 0.2244                | mM               | MDH Michaelis constant for NAD <sup>+</sup>                | (Cortassa et al., 2006) |
| [GLU]           | $1 \times 10^{-3}$    | mM               | Glutamate concentration                                    | (Cortassa et al., 2006) |
| $k_f^{AAT}$     | 0.0214                | ms <sup>-1</sup> | Forward rate constant of aspartate amino transferase (AAT) | (Cortassa et al., 2006) |
| $K_E^{AAT}$     | 6.6                   |                  | AAT equilibrium constant                                   | (Cortassa et al., 2006) |
| $k_{ASP}$       | $1.5 \times 10^{-6}$  | ms <sup>-1</sup> | Rate constant of aspartate consumption                     | (Cortassa et al., 2006) |

## 1.2.8 Oxidative Phosphorylation rate equations

### Complex I-linked electron transport

$$V_{O_2} = 0.5 \rho^{res} \frac{\left( r_a + r_{c1} e^{\left( \frac{6F\Delta\Psi_B}{RT} \right)} \right) e^{\left( \frac{FA_{res}}{RT} \right)} - r_a e^{\left( \frac{g6F\Delta\mu_H}{RT} \right)} + r_{c2} e^{\left( \frac{FA_{res}}{RT} \right)} e^{\left( \frac{g6F\Delta\mu_H}{RT} \right)}}{\left( 1 + r_1 e^{\left( \frac{FA_{res}}{RT} \right)} \right) e^{\left( \frac{6F\Delta\Psi_B}{RT} \right)} + \left( r_2 + r_3 e^{\left( \frac{FA_{res}}{RT} \right)} \right) e^{\left( \frac{g6F\Delta\mu_H}{RT} \right)}} \quad (S123)$$

$$V_{He} = 6 \rho^{res} \frac{\left( r_a e^{\left( \frac{A_{res}F}{RT} \right)} - (r_a + r_b) e^{\left( \frac{g6F\Delta\mu_H}{RT} \right)} \right)}{\left( 1 + r_1 e^{\left( \frac{FA_{res}}{RT} \right)} \right) e^{\left( \frac{6F\Delta\Psi_B}{RT} \right)} + \left( r_2 + r_3 e^{\left( \frac{FA_{res}}{RT} \right)} \right) e^{\left( \frac{g6F\Delta\mu_H}{RT} \right)}}$$



$$A_{res} = \frac{RT}{F} \ln \left( K_{res} \sqrt{\frac{[NADH]}{[NAD^+]}} \right)$$

***H<sup>+</sup> transport linked to Succinate dehydrogenase (HSDH)***

$$V_{He(SDH)} = 4\rho^{res(SDH)} \frac{\left( r_a e^{\left(\frac{A_{RSDH}F}{RT}\right)} - (r_a + r_b) e^{\left(\frac{g4F\Delta\mu_H}{RT}\right)} \right)}{\left( 1 + r_1 e^{\left(\frac{FA_{RSDH}}{RT}\right)} \right) e^{\left(\frac{4F\Delta\Psi_B}{RT}\right)} + \left( r_2 + r_3 e^{\left(\frac{FA_{RSDH}}{RT}\right)} \right) e^{\left(\frac{g4F\Delta\mu_H}{RT}\right)}} \left( \frac{1}{1 + \frac{[OAA]}{K_i^{OAA}}} \right) \quad (S124)$$

$$A_{RSDH} = \frac{RT}{F} \ln \left( K_{RSDH,app} \sqrt{\frac{[SUC]}{[FUM]}} \right)$$

$$K_{RSDH,app} = \frac{K_{res(SDH)}}{P_{SUC}}$$

***Complex II linked electron transport from ETF***

$$V_{O_2}^{ETF} = 0.5\rho^{res(ETF)} \frac{\left( r_a + r_{c1} e^{\left(\frac{4F\Delta\Psi_B}{RT}\right)} \right) e^{\left(\frac{FA_{ETF}}{RT}\right)} - r_a e^{\left(\frac{g4F\Delta\mu_H}{RT}\right)} + r_{c2} e^{\left(\frac{FA_{ETF}}{RT}\right)} e^{\left(\frac{g4F\Delta\mu_H}{RT}\right)}}{\left( 1 + r_1 e^{\left(\frac{FA_{ETF}}{RT}\right)} \right) e^{\left(\frac{4F\Delta\Psi_B}{RT}\right)} + \left( r_2 + r_3 e^{\left(\frac{FA_{ETF}}{RT}\right)} \right) e^{\left(\frac{g4F\Delta\mu_H}{RT}\right)}} \quad (S125)$$

$$V_{He(ETF)} = 4\rho^{res(ETF)} \frac{\left( r_a e^{\left(\frac{A_{ETF}F}{RT}\right)} - (r_a + r_b) e^{\left(\frac{g4F\Delta\mu_H}{RT}\right)} \right)}{\left( 1 + r_1 e^{\left(\frac{FA_{ETF}}{RT}\right)} \right) e^{\left(\frac{4F\Delta\Psi_B}{RT}\right)} + \left( r_2 + r_3 e^{\left(\frac{FA_{ETF}}{RT}\right)} \right) e^{\left(\frac{g4F\Delta\mu_H}{RT}\right)}}$$

$$A_{ETF} = \frac{RT}{F} \ln \left( K_{ETF,app} \sqrt{\frac{[FADH2]}{[FAD]}} \right)$$

$$K_{ETF,app} = \frac{K_{res(FAD)}}{P_{H_2O}}$$

**ATP synthase (ATPase)**

$$V_{ATPase} = -\rho^{F1} \frac{(100p_a + p_{c1} \exp(3F\Delta\Psi_B / RT)) \exp(A_{F1}F / RT) - \left( p_a \exp(3F\Delta\mu_H / RT) \right.}{(1 + p_1 \exp(A_{F1}F / RT)) \exp(3F\Delta\Psi_B / RT) + (p_2 + p_3 \exp(A_{F1}F / RT)) \exp(3F\Delta\mu_H / RT)} \left. \dots + p_{c2} \exp(A_{F1}F / RT) \exp(3F\Delta\mu_H / RT) \right) \quad (S126)$$

$$V_{Hu} = -3\rho^{F1} \frac{p_a (1 + \exp(A_{F1}F / RT)) - (p_a + p_b) \exp(3F\Delta\mu_H / RT)}{(1 + p_1 \exp(A_{F1}F / RT)) \exp(3F\Delta\Psi_B / RT) + (p_2 + p_3 \exp(A_{F1}F / RT)) \exp(3F\Delta\mu_H / RT)}$$

$$A_{F1} = \frac{RT}{F} \ln \left( K_{app}^{ATPase} \frac{[MgATP^{2-}]}{[ADP_{free}][Pi_{total}]} \right)$$

$$K_{app}^{ATPase} = K_{eq}^{ATPase} [H^+]^1 \frac{P_{ATP} P_{H_2O}}{P_{ADP} P_{Pi}}$$

**Adenine nucleotide translocator (ANT)**

$$V_{ANT} = V_{\max ANT} \frac{\left( 1 - \frac{[ATP^{4-}]_i \times [ADP^{3-}]_m}{[ADP^{3-}]_i \times [ATP^{4-}]_m} \right) \exp(-F\Delta\Psi_m / RT)}{\left( 1 + \frac{[ATP^{4-}]_i}{[ADP^{3-}]_i} \exp(-hF\Delta\Psi / RT) \right) \left( 1 + \frac{[ADP^{3-}]_m}{[ATP^{4-}]_m} \right)} \quad (S127)$$

**Citrate carrier**

$$V_{CiC} = \frac{V_{\max}^{CiC} \left( \frac{MAL_c \cdot Cit_m}{K_{M\_CiC}^{MAL_c} \cdot K_{M\_CiC}^{Cit_m}} - \frac{MAL_m \cdot Cit_c}{K_{M\_CiC}^{MAL_m} \cdot K_{M\_CiC}^{Cit_c}} \right)}{1 + \frac{MAL_m \cdot Cit_c}{K_{M\_CiC}^{MAL_m} \cdot K_{M\_CiC}^{Cit_c}} + \frac{MAL_c}{K_{M\_CiC}^{MAL_c}} + \frac{Cit_m}{K_{M\_CiC}^{Cit_m}} + \frac{MAL_c \cdot Cit_m}{K_{M\_CiC}^{MAL_c} \cdot K_{M\_CiC}^{Cit_m}} + \frac{MAL_m}{K_{M\_CiC}^{MAL_m}} + \frac{Cit_c}{K_{M\_CiC}^{Cit_c}}}. \quad (S128)$$

$$\left( 1 + \frac{H^+}{K_{h1,c}} + \frac{K_{h2,c}}{H^+} \right)^{-1}$$

## 1.2.9 Supplementary Table S5. Parameter values of oxidative phosphorylation

| Symbol            | Value                   | Units            | Description                                                          | Reference               |
|-------------------|-------------------------|------------------|----------------------------------------------------------------------|-------------------------|
| $r_a$             | $6.394 \times 10^{-13}$ | $\text{ms}^{-1}$ | Sum of products of rate constants                                    | (Cortassa et al., 2003) |
| $r_b$             | $1.762 \times 10^{-16}$ | $\text{ms}^{-1}$ | Sum of products of rate constants                                    | (Cortassa et al., 2003) |
| $r_{c1}$          | $2.656 \times 10^{-22}$ | $\text{ms}^{-1}$ | Sum of products of rate constants                                    | (Cortassa et al., 2003) |
| $r_{c2}$          | $8.632 \times 10^{-30}$ | $\text{ms}^{-1}$ | Sum of products of rate constants                                    | (Cortassa et al., 2003) |
| $r_1$             | $2.077 \times 10^{-18}$ |                  | Sum of products of rate constants                                    | (Cortassa et al., 2003) |
| $r_2$             | $1.728 \times 10^{-9}$  |                  | Sum of products of rate constants                                    | (Cortassa et al., 2003) |
| $r_3$             | $1.059 \times 10^{-26}$ |                  | Sum of products of rate constants                                    | (Cortassa et al., 2003) |
| $\rho^{res}$      | 0.2                     | mM               | Concentration of electron carriers (respiratory complexes I-III-IV)  | (Cortassa et al., 2003) |
| $K_{res}$         | $1.35 \times 10^{18}$   |                  | Equilibrium constant of respiration                                  | (Cortassa et al., 2003) |
| $\rho^{res(SDH)}$ | 0.017                   | mM               | Concentration of electron carriers (respiratory complexes II-III-IV) | (Cortassa et al., 2003) |
| $\Delta\Psi_B$    | 50                      | mV               | Phase boundary potential                                             | (Cortassa et al., 2003) |
| $g$               | 0.85                    |                  | Correction factor for voltage                                        | (Cortassa et al., 2003) |
| $K_i^{OAA}$       | 0.15                    |                  | Inhibition constant for OAA                                          | (Cortassa et al., 2003) |
| $K_{res(SDH)}$    | $5.765 \times 10^{13}$  |                  | Equilibrium constant of SDH                                          | (Cortassa et al., 2003) |
| $\rho^{res(ETF)}$ | 0.75                    | mM               | Concentration of electron carriers (respiratory complexes II-III-IV) | (Cortassa et al., 2003) |
| $K_{res(FAD)}$    | $6.949 \times 10^{16}$  |                  | Equilibrium constant of FADH <sub>2</sub>                            | (Cortassa et al., 2003) |
| $p_a$             | $1.656 \times 10^{-8}$  | $\text{ms}^{-1}$ | Sum of products of rate constants                                    | (Cortassa et al., 2003) |
| $p_b$             | $3.373 \times 10^{-10}$ | $\text{ms}^{-1}$ | Sum of products of rate constants                                    | (Cortassa et al., 2003) |
| $p_{c1}$          | $9.651 \times 10^{-17}$ | $\text{ms}^{-1}$ | Sum of products of rate constants                                    | (Cortassa et al., 2003) |
| $p_{c2}$          | $4.585 \times 10^{-17}$ | $\text{ms}^{-1}$ | Sum of products of rate constants                                    | (Cortassa et al., 2003) |
| $p_1$             | $1.346 \times 10^{-4}$  |                  | Sum of products of rate constants                                    | (Cortassa et al., 2003) |
| $p_2$             | $7.739 \times 10^{-7}$  |                  | Sum of products of rate constants                                    | (Cortassa et al., 2003) |
| $p_3$             | $6.65 \times 10^{-15}$  |                  | Sum of products of rate constants                                    | (Cortassa et al., 2003) |

| Symbol              | Value                | Units                   | Description                                            | Reference               |
|---------------------|----------------------|-------------------------|--------------------------------------------------------|-------------------------|
| $\rho^{F1}$         | 1.5                  | mM                      | Concentration of F <sub>1</sub> F <sub>0</sub> -ATPase | (Cortassa et al., 2003) |
| $K_{eq}^{ATPase}$   | $1.71 \times 10^6$   |                         | Equilibrium constant of ATP synthesis                  | (Cortassa et al., 2003) |
| $V_{maxANT}$        | 3.15                 | mM.<br>ms <sup>-1</sup> | Maximal rate of the ANT                                | (Cortassa et al., 2003) |
| $h^{ANT}$           | 0.5                  |                         | Fraction of $\Delta\Psi_B$                             | (Cortassa et al., 2003) |
| $V_{max}^{CiC}$     | 0.01                 | mM.<br>ms <sup>-1</sup> | Maximal rate of citrate carrier                        | (Bisaccia et al., 1990) |
| $K_{M\_CiC}^{MALc}$ | 0.17                 | mM                      | CiC Michaelis constant for cyto malate                 | (Bisaccia et al., 1990) |
| $K_{M\_CiC}^{MALm}$ | 0.057                | mM                      | CiC Michaelis constant for mito malate                 | (Bisaccia et al., 1990) |
| $K_{M\_CiC}^{Citc}$ | 0.036                | mM                      | CiC Michaelis constant for cyto citrate                | (Bisaccia et al., 1990) |
| $K_{M\_CiC}^{Citm}$ | 0.288                | mM                      | CiC Michaelis constant for mito citrate                | (Bisaccia et al., 1990) |
| $K_{h1,c}$          | $2.0 \times 10^{-4}$ |                         | Ionization constant for CiC                            | (Bisaccia et al., 1990) |
| $K_{h2,c}$          | $7.5 \times 10^{-6}$ |                         | Ionization constant for CiC                            | (Bisaccia et al., 1990) |

### 1.2.10 Acid-base equilibria of adenine nucleotides and phosphate

$$[ATP^{4-}]_m = \frac{[ATP_{total}]_m}{\left(1 + \frac{[H^+]_m}{K_{a,ATP}} + \frac{[Mg^{2+}]_m}{K_{Mg,ATP}}\right)} \quad (S129)$$

$$[HATP^{3-}]_m = \frac{[ATP^{4-}]_m [H^+]_m}{K_{a,ATP}} \quad [MgATP^{2-}]_m = \frac{[ATP^{4-}]_m [Mg^{2+}]_m}{K_{Mg,ATP}}$$

$$[ADP^{3-}]_m = \frac{[ADP_{total}]_m}{\left(1 + \frac{[H^+]_m}{K_{a,ADP}} + \frac{[Mg^{2+}]_m}{K_{Mg,ADP}}\right)}$$

$$[HADP^{2-}]_m = \frac{[ADP^{3-}]_m [H^+]_m}{K_{a,ADP}} \quad [MgADP^-]_m = \frac{[ADP^{3-}]_m [Mg^{2+}]_m}{K_{Mg,ADP}}$$

$$[H_2PO_4^-]_m = \frac{[Pi]_{total}}{1 + \frac{[H^+]_m}{K_{a,Pi}}} \quad (S130)$$

$$[HPO_4^{2-}]_m = \frac{[H_2PO_4^-]_m K_{a,Pi}}{[H^+]_m}$$

$$[ATP^{4-}]_i = \frac{[ATP_{total}]_i}{\left(1 + \frac{[H^+]_i}{K_{a,ATP}} + \frac{[Mg^{2+}]_i}{K_{Mg,ATP}}\right)} \quad [ADP^{3-}]_i = \frac{[ADP_{total}]_i}{\left(1 + \frac{[H^+]_i}{K_{a,ADP}} + \frac{[Mg^{2+}]_i}{K_{Mg,ADP}}\right)} \quad (S131)$$

$$[ATP_{total}] = [ATP^{4-}] + [HATP^{3-}] + [MgATP^-]$$

$$[ATP_{free}] = [ATP^{4-}] + [HATP^{3-}]$$

$$[ADP_{free}] = [ADP^{3-}] + [HADP^{2-}]$$

$$[Pi_{total}] = [H_2Pi^-] + [HPi^{2-}]$$

(S132)

### 1.2.11 Polynomials for species undergoing acid-base equilibrium, ionic gradients, and conservation relations

$$P_{ATP} = 1 + \frac{[H^+]_m}{K_{a,ATP}} + \frac{[Mg^{2+}]_m}{K_{Mg,ATP}} \quad (S133)$$

$$P_{ADP} = 1 + \frac{[H^+]_m}{K_{a,ADP}} + \frac{[Mg^{2+}]_m}{K_{Mg,ADP}}$$

$$P_{Pi} = 1 + \frac{[H^+]_m}{K_{a,Pi}} \quad (S134)$$

$$P_{SUC} = 1 + \frac{[H^+]_m}{K_{a,SUC}}$$

$$P_{H_2O} = 1 + \frac{[H^+]_m}{K_{a,H_2O}}$$

$$\Delta\mu_H = -2.303 \frac{RT}{F} \Delta pH + \Delta\Psi_m$$

$$\Delta pH = pH_i - pH_m$$

$$\Delta\Psi_m = \Psi_i - \Psi_m$$

(S135)

$$[NAD^+] = C_{PN} - [NADH] \quad (S136)$$

$$[ATP_{total}] = C_A - [ADP_{total}] \quad (S137)$$

### 1.2.12 Supplementary Table S6. Parameters used in acid base equilibria and conservation relations

| Symbol       | Value                 | Units | Description                           | Reference          |
|--------------|-----------------------|-------|---------------------------------------|--------------------|
| $K_{a,ADP}$  | $4.17 \times 10^{-7}$ |       | ADP dissociation constant             | (Wei et al., 2011) |
| $K_{a,ATP}$  | $3.31 \times 10^{-7}$ |       | ATP dissociation constant             | (Wei et al., 2011) |
| $K_{a,Pi}$   | $1.78 \times 10^{-7}$ |       | Pi dissociation constant              | (Wei et al., 2011) |
| $K_{Mg,ATP}$ | $6.46 \times 10^{-5}$ |       | $Mg^{2+}$ ATP dissociation constant   | (Wei et al., 2011) |
| $K_{Mg,ADP}$ | $5.62 \times 10^{-4}$ |       | $Mg^{2+}$ ADP dissociation constant   | (Wei et al., 2011) |
| $K_{a,SUC}$  | $6.3 \times 10^{-6}$  |       | Ka of succinate dissociation constant | (Wei et al., 2011) |
| $K_{a,H_2O}$ | $1 \times 10^{-14}$   | M     | Dissociation constant for water       | (Wei et al., 2011) |
| $C_A$        | 1.5                   | mM    | Total sum of adenine nucleotides      | (Wei et al., 2011) |
| $[ADP]_i$    | 0.005-0.1             | mM    | Cytoplasmic ADP concentration         | (Wei et al., 2011) |
| $C_{PN}$     | 1.0                   | mM    | Sum of pyridine nucleotides           | (Wei et al., 2011) |

### 1.2.13 Ionic fluxes rate equations

$$V_{uni} = V_{max}^{uni} \frac{\frac{[Ca^{2+}]_i}{K_{trans}} \left(1 + \frac{[Ca^{2+}]_i}{K_{trans}}\right)^3 \frac{2F(\Delta\Psi_m - \Delta\Psi^{\circ})}{RT}}{\left( \left(1 + \frac{[Ca^{2+}]_i}{K_{trans}}\right)^4 + \frac{L}{\left(1 + \frac{[Ca^{2+}]_i}{K_{act}}\right)^{n_a}} \right) \left(1 - e^{\left(\frac{-2F(\Delta\Psi_m - \Delta\Psi^{\circ})}{RT}\right)}\right)} \quad (S138)$$

$$V_{NaCa} = V_{max}^{NaCa} \frac{e^{\left(\frac{bF(\Delta\Psi_m - \Delta\Psi^{\circ})}{RT}\right)} \left(\ln \frac{[Ca^{2+}]_m}{[Ca^{2+}]_i}\right)}{\left(1 + \frac{K_{Na}}{[Na^+]_i}\right)^n \left(1 + \frac{K_{Ca}}{[Ca^{2+}]_m}\right)} \quad (S139)$$

$$J_{NHE} = c_{NHE} \frac{\beta_1^+ \beta_2^+ - \beta_1^- \beta_2^-}{\beta_1^+ + \beta_1^- + \beta_2^+ + \beta_2^-} \frac{1}{1 + 10^{n_i(pH_i - pK_i)}} \quad (S140)$$

$$\begin{aligned}
 \beta_1^+ &= \frac{k_1^+ K_{H\_NHE} [Na^+]_m}{K_{H\_NHE} [Na^+]_m + K_{H\_NHE} K_{Na\_NHE} + K_{Na\_NHE} [H^+]_m} \\
 \beta_2^+ &= \frac{k_2^+ K_{Na\_NHE} [H^+]_i}{K_{H\_NHE} [Na^+]_i + K_{H\_NHE} K_{Na\_NHE} + K_{Na\_NHE} [H^+]_i} \\
 \beta_1^- &= \frac{k_1^- K_{H\_NHE} [Na^+]_i}{K_{H\_NHE} [Na^+]_i + K_{H\_NHE} K_{Na\_NHE} + K_{Na\_NHE} [H^+]_i} \\
 \beta_2^- &= \frac{k_2^- K_{Na\_NHE} [H^+]_m}{K_{H\_NHE} [Na^+]_m + K_{H\_NHE} K_{Na\_NHE} + K_{Na\_NHE} [H^+]_m} \\
 J_{PIC} &= c_{PiC} \left( \frac{V_{PIC,f} \frac{[HPO_4^{2-}]_i [OH^-]_m}{K_{Pi,i} K_{OH,m}} - V_{PIC,b} \frac{[HPO_4^{2-}]_m [OH^-]_i}{K_{Pi,m} K_{OH,i}}}{1 + \frac{[HPO_4^{2-}]_i}{K_{Pi,i}} + \frac{[OH^-]_m}{K_{OH,m}} + \frac{[HPO_4^{2-}]_m}{K_{Pi,m}} + \dots}{\frac{[OH^-]_i}{K_{OH,i}} + \frac{[HPO_4^{2-}]_m [OH^-]_i}{K_{Pi,m} K_{OH,i}} + \frac{[HPO_4^{2-}]_i [OH^-]_m}{K_{Pi,i} K_{OH,m}}} \right) \quad (S141)
 \end{aligned}$$

$$V_{Hleak} = g_H \left( 1 + \frac{F_{FA} \cdot C16CoA_c^4}{(C16CoA_c + C16CoA_{Ref})^4} \right) \Delta\mu_H \quad (S142)$$

### 1.2.14 Supplementary Table S7. Parameters for the mitochondrial ion handling equations

| Symbol             | Value                  | Units               | Description                                                              | Reference               |
|--------------------|------------------------|---------------------|--------------------------------------------------------------------------|-------------------------|
| $V_{max}^{uni}$    | $4.459 \times 10^{-3}$ | mM ms <sup>-1</sup> | $V_{max}$ Ca <sup>2+</sup> uniporter                                     | (Cortassa et al., 2003) |
| $\Delta\Psi^\circ$ | 91                     | mV                  | Offset membrane potential                                                | (Cortassa et al., 2003) |
| $K_{act}$          | $3.8 \times 10^{-4}$   | mM                  | Activation constant                                                      | (Cortassa et al., 2003) |
| $K_{trans}$        | 0.019                  | mM                  | $K_d$ for translocated Ca <sup>2+</sup>                                  | (Cortassa et al., 2003) |
| $L$                | 110.0                  |                     | $K_{eq}$ for conformational transitions in uniporter                     | (Cortassa et al., 2003) |
| $n_a$              | 2.8                    |                     | Uniporter activation cooperativity                                       | (Cortassa et al., 2003) |
| $V_{max}^{NaCa}$   | $1.833 \times 10^{-4}$ | mM ms <sup>-1</sup> | $V_{max}$ of Na <sup>+</sup> /Ca <sup>2+</sup> exchanger                 | (Cortassa et al., 2003) |
| $b$                | 0.5                    |                     | $\Delta\Psi_m$ dependence on Na <sup>+</sup> /Ca <sup>2+</sup> exchanger | (Cortassa et al., 2003) |
| $K_{Na}$           | 9.4                    | mM                  | Exchanger Na <sup>2+</sup> constant                                      | (Cortassa et al., 2003) |
| $K_{Ca}$           | $3.75 \times 10^{-4}$  | mM                  | Exchanger Ca <sup>2+</sup> constant                                      | (Cortassa et al., 2003) |
| $n$                | 3.0                    |                     | Na <sup>+</sup> /Ca <sup>2+</sup> exchanger cooperativity                | (Cortassa et al., 2003) |
| $\delta_{Ca}$      | $3 \times 10^{-4}$     |                     | Fraction of free [Ca <sup>2+</sup> ] <sub>m</sub>                        | (Cortassa et al., 2003) |

| Symbol            | Value                  | Units                    | Description                              | Reference                |
|-------------------|------------------------|--------------------------|------------------------------------------|--------------------------|
| $\delta_H$        | $1 \times 10^{-5}$     |                          | mitochondria $H^+$ buffering capacity    | (Wei et al., 2011)       |
| $k_1^+$           | 0.0252                 | $ms^{-1}$                | NHE forward rate constant                | (Wei et al., 2011)       |
| $k_1^-$           | 0.0429                 | $ms^{-1}$                | NHE backward rate constant               | (Wei et al., 2011)       |
| $k_4^+$           | 0.16                   | $ms^{-1}$                | NHE forward rate constant                | (Wei et al., 2011)       |
| $k_4^-$           | 0.0939                 | $ms^{-1}$                | NHE backward rate constant               | (Wei et al., 2011)       |
| $K_{Na\_NHE}$     | 24                     | mM                       | $Na^+$ dissociation constant             | (Wei et al., 2011)       |
| $K_{H\_NHE}$      | $1.585 \times 10^{-4}$ | mM                       | $H^+$ dissociation constant              | (Wei et al., 2011)       |
| $pK_i$            | 8.52                   |                          | Proton inhibitory constant               | (Wei et al., 2011)       |
| $n_i\_NHE$        | 3                      |                          | Hill coefficient for $H^+$ binding       | (Wei et al., 2011)       |
| $C_{NHE}$         | 0.00785                | mM                       | NHE concentration                        | (Wei et al., 2011)       |
| $K_{Pi,i}$        | 11.06                  | mM                       | Extra-matrix Pi binding constant         | (Wei et al., 2011)       |
| $K_{Pi,m}$        | 11.06                  | mM                       | Mitochondrial matrix Pi binding constant | (Wei et al., 2011)       |
| $K_{OH,m}$        | $4.08 \times 10^{-5}$  | mM                       | Mitochondrial matrix OH-binding constant | (Wei et al., 2011)       |
| $K_{OH,i}$        | $4.08 \times 10^{-5}$  | mM                       | Extra-matrix OH- binding constant        | (Wei et al., 2011)       |
| $V_{PIC,f}$       | $7.35 \times 10^{-3}$  | $mM \ ms^{-1}$           | Forward $V_{max}$ of phosphate carrier   | (Wei et al., 2011)       |
| $V_{PIC,b}$       | $7.35 \times 10^{-3}$  | $mM \ ms^{-1}$           | Backward $V_{max}$ of phosphate carrier  | (Wei et al., 2011)       |
| $[Pi]_i$          | 3.0                    | mM                       | Cytoplasmic phosphate concentration      | (Wei et al., 2011)       |
| $g_H$             | $2.0 \times 10^{-6}$   | $mM \ ms^{-1} \ mV^{-1}$ | Ionic conductance of the inner membrane  | (Wei et al., 2011)       |
| FFA               | $1.0 \times 10^2$      |                          | Leak-activation factor by PCoA           | (Cortassa et al., 2017a) |
| $C_{16CoA_{Ref}}$ | 35                     | $\mu M$                  | Reference concentration of PCoA          | (Cortassa et al., 2017a) |
| $[H^+]_i$         | $1 \times 10^{-4}$     | mM                       | Cytoplasmic $H^+$ concentration          | (Wei et al., 2011)       |
| $[Na^+]_i$        | 10.0                   | mM                       | Cytoplasmic $Na^+$ concentration         | (Wei et al., 2011)       |
| $[Ca^{2+}]_i$     | $1 \times 10^{-4}$     | mM                       | Cytoplasmic $Ca^{2+}$ concentration      | (Cortassa et al., 2003)  |
| $C_{mito}$        | $1.812 \times 10^{-3}$ | $mM \ mV^{-1}$           | Inner membrane capacitance               | (Cortassa et al., 2003)  |



### 1.2.15 Transport of activated fatty acid into the mitochondrial matrix

Carnitine palmitoyl transferase I (Eq. S143), Carnitine Acyl carnitine translocase (Eq. S144) and Carnitine Palmitoyl transferase II (Eq. S145). The enzymes' rate expressions were modelled as bi-reactant reversible reactions, with CPT1 being inhibited by cytoplasmic Malonyl Coenzyme A (van Eunen et al., 2013). Because of the three successive steps catalyzed by the above-mentioned transporters/enzymes, PCoA is transported from the cytoplasmic into the mitochondrial matrix compartment where  $\beta$ -oxidation takes place.

$$V_{cpt1}^{C16} = sf_{cpt1}^{C16} \cdot V_{cpt1} \frac{\left( \frac{C16CoA_c \cdot Carn_c}{K_{Mcpt1}^{C16CoAc}} \cdot \frac{Carn_c}{K_{Mcpt1}^{Carn_c}} \right) - \left( \frac{C16Carn_c \cdot CoA_c}{K_{Mcpt1}^{C16CoAc}} \cdot \frac{CoA_c}{K_{Mcpt1}^{Carn_c} K_{EQ}^{cpt1}} \right)}{\left( 1 + \frac{C16CoA_c}{K_{Mcpt1}^{C16CoAc}} + \frac{C16Carn_c}{K_{Mcpt1}^{C16Carn_c}} + \left( \frac{MalCoA_c}{K_{icpt1}^{MalCoAc}} \right)^{n_{cpt1}} \right) \left( 1 + \frac{Carn_c}{K_{Mcpt1}^{Carn_c}} + \frac{CoA_c}{K_{Mcpt1}^{CoAc}} \right)} \quad (S143)$$

$$V_{cact}^{C16} = V_{f cact} \frac{(C16Carn_c \cdot Carn_m) - \left( C16Carn_m \cdot \frac{Carn_c}{K_{EQ}^{cact1}} \right)}{\left( C16Carn_c \cdot Carn_m + K_{M cact}^{Carn m} C16Carn_c + K_{M cact}^{C16Carn c} \cdot Carn_m \left( 1 + \frac{Carn_c}{K_{i cact}^{Carn c}} \right) + \dots \right) \left( \frac{V_{f cact}}{V_{r cact} K_{EQ}^{cact}} \left( K_{M cact}^{Carn c} C16Carn_m \left( 1 + \frac{C16Carn_c}{K_{i cact}^{C16Carn c}} \right) + Carn_c \cdot \left( K_{M cact}^{C16Carn m} + C16Carn_m \right) \right) \right)} \quad (S144)$$

$$V_{cpt2}^{C16} = sf_{cpt2}^{C16} \cdot V_{cpt2} \frac{\left( \frac{C16Carn_m \cdot CoA_m}{K_{Mcpt2}^{C16Carn m}} \cdot \frac{CoA_m}{K_{Mcpt2}^{CoAm}} \right) - \left( \frac{C16CoA_m \cdot Carn_m}{K_{Mcpt2}^{C16Carn m}} \cdot \frac{Carn_m}{K_{Mcpt2}^{CoAm} K_{EQ}^{cpt2}} \right)}{\left( 1 + \frac{C16Carn_m}{K_{Mcpt2}^{C16Carn m}} + \frac{C16CoA_m}{K_{Mcpt2}^{C16CoAm}} \right) \left( 1 + \frac{Carn_m}{K_{Mcpt2}^{Carn m}} + \frac{CoA_m}{K_{Mcpt2}^{CoAm}} \right)} \quad (S145)$$

### 1.2.16 Supplementary Table S8. Parameters for fatty acids transport into the mitochondrial matrix

| Symbol                  | Value                | Units               | Description                                           |
|-------------------------|----------------------|---------------------|-------------------------------------------------------|
| $sf_{cpt1}^{C16}$       | 1.0                  |                     | Scale factor of CPT1 for PalmitoylCarnitine (Pcarnit) |
| $V_{cpt1}$              | $1.0 \times 10^{-3}$ | mM ms <sup>-1</sup> | Maximal rate of CPT1                                  |
| $K_{Mcpt1}^{C16CoAc}$   | 13.8                 | $\mu$ M             | CPT1 Michaelis constant ( $K_M$ ) for PCoA            |
| $K_{Mcpt1}^{Carn c}$    | 125                  | $\mu$ M             | CPT1 $K_M$ for Carnitine                              |
| $K_{icpt1}^{MalCoAc}$   | 9.1                  | $\mu$ M             | CPT1 inhibition constant for Malonyl CoA              |
| $K_{Mcpt1}^{C16Carn c}$ | 136                  | $\mu$ M             | CPT1 $K_M$ for Pcarnit                                |

| Symbol                               | Value                 | Units               | Description                                                         |
|--------------------------------------|-----------------------|---------------------|---------------------------------------------------------------------|
| $K_{M\text{cpt1}}^{\text{CoAc}}$     | 40.7                  | $\mu\text{M}$       | CPT1 $K_M$ for Coenzyme A (CoA)                                     |
| $\text{C16CoA}_c$                    | 0-40                  | $\mu\text{M}$       | Concentration of cytoplasmic PCoA                                   |
| $\text{MalCoA}_c$                    | 0.0                   | $\mu\text{M}$       | Extra-matrix concentration of Malonyl CoA                           |
| $n_{\text{cpt1}}$                    | 2.48                  |                     | CPT1 Hill Coefficient for MalCoAc                                   |
| $K_{EQ}^{\text{cpt1}}$               | 0.45                  |                     | CPT1 equilibrium constant                                           |
| $V_{f\text{cact}}$                   | 0.7                   | $\text{mM ms}^{-1}$ | Forward maximal rate of carnitine acyl carnitine translocase (CACT) |
| $V_{r\text{cact}}$                   | 0.7                   | $\text{mM ms}^{-1}$ | CACT reverse rate                                                   |
| $K_{M\text{cact}}^{\text{Carnm}}$    | 0.13                  | $\text{mM}$         | CACT $K_M$ for Carnitine (mito)                                     |
| $K_{M\text{cact}}^{\text{Carnc}}$    | 1.3                   | $\text{mM}$         | CACT $K_M$ for Carnitine (cyto)                                     |
| $K_{i\text{cact}}^{\text{C16Carnc}}$ | 15                    | $\mu\text{M}$       | CACT inhibition constant for Pcarnit                                |
| $K_{i\text{cact}}^{\text{Carnc}}$    | 0.2                   | $\text{mM}$         | CACT inhibition constant for Carnitine                              |
| $K_{M\text{cact}}^{\text{C16Carnm}}$ | 0.15                  | $\text{mM}$         | CACT $K_M$ for Pcarnit (mito)                                       |
| $K_{M\text{cact}}^{\text{C16Carnc}}$ | 0.56                  | $\text{mM}$         | CACT $K_M$ for Pcarnit (cyto)                                       |
| $\text{Carn}_c$                      | 0.4                   | $\text{mM}$         | Cytoplasmic Carnitine                                               |
| $\text{Carn}_m$                      | 0.95                  | $\text{mM}$         | Mitochondrial Carnitine                                             |
| $K_{EQ}^{\text{cact1}}$              | 1                     | -                   | CACT equilibrium constant                                           |
| $sf_{\text{cpt2}}^{\text{C16}}$      | 0.85                  |                     | Scale factor of carnitine palmitoyl transferase2 (CPT2) for Pcarnit |
| $V_{\text{cpt2}}$                    | $1.955 \cdot 10^{-2}$ | $\text{mM ms}^{-1}$ | CPT2 forward maximal rate                                           |
| $K_{M\text{cpt2}}^{\text{C16Carnm}}$ | 51                    | $\mu\text{M}$       | CPT2 $K_M$ for Pcarnit (mito)                                       |
| $K_{M\text{cpt2}}^{\text{C16CoAm}}$  | 38                    | $\mu\text{M}$       | CPT2 $K_M$ for PCoA (mito)                                          |
| $K_{M\text{cpt2}}^{\text{CoAm}}$     | 30                    |                     | CPT2 $K_M$ for CoA (mito)                                           |
| $K_{M\text{cpt2}}^{\text{Carnm}}$    | 0.35                  | $\text{mM}$         | CPT2 $K_M$ for Carnitine (mito)                                     |
| $K_{EQ}^{\text{cpt2}}$               | 2.22                  |                     | CPT2 equilibrium constant                                           |

Parameter values were taken from (Cortassa et al., 2017a) and (van Eunen et al., 2013) with the exception of  $V_{cpt1}$ ,  $V_{f\text{cact}}$ ,  $V_{r\text{cact}}$  and  $V_{cpt2}$  that were adjusted on the basis of fluxes of palmitate oxidation reported in adult cardiomyocytes (Mazumder et al., 2004).

### Mitochondrial matrix fatty acyl-CoA dehydrogenases

These dehydrogenases catalyze the oxidation of AcylCoA using FAD as electron acceptor. We lumped the dehydrogenase step with the reduction of the FAD group in the electron transfer protein. The FAD group will be re-oxidized by complex II in the respiratory chain as indicated in equation S122 (see below).

$$V_{\text{vlcad}}^{\text{C16}} = sf_{\text{vlcad}}^{\text{C16}} \cdot V_{\text{vlcad}} \frac{\left( \frac{\text{C16CoA}_m}{K_{M\text{vlcad}}^{\text{C16CoAm}}} \cdot \frac{\text{ETF}_m}{K_{M\text{vlcad}}^{\text{ETFm}}} \right) - \left( \frac{\text{C16enoCoA}_m}{K_{M\text{vlcad}}^{\text{C16CoAm}}} \cdot \frac{\text{ETFH}_{2m}}{K_{M\text{vlcad}}^{\text{ETFm}} K_{EQ}^{\text{vlcad}}} \right)}{V_{\text{vlcad}}^{\text{DENOMINATOR}}} \quad (\text{S146})$$

$$V_{\text{vlcad}}^{\text{C14}} = sf_{\text{vlcad}}^{\text{C14}} \cdot V_{\text{vlcad}} \frac{\left( \frac{\text{C14CoA}_m}{K_{M\text{vlcad}}^{\text{C14CoAm}}} \cdot \frac{\text{ETF}_m}{K_{M\text{vlcad}}^{\text{ETFm}}} \right) - \left( \frac{\text{C14enoCoA}_m}{K_{M\text{vlcad}}^{\text{C14CoAm}}} \cdot \frac{\text{ETFH}_{2m}}{K_{M\text{vlcad}}^{\text{ETFm}} K_{EQ}^{\text{vlcad}}} \right)}{V_{\text{vlcad}}^{\text{DENOMINATOR}}} \quad (\text{S147})$$

$$V_{\text{vlcad}}^{\text{C12}} = sf_{\text{vlcad}}^{\text{C12}} \cdot V_{\text{vlcad}} \frac{\left( \frac{\text{C12CoA}_m}{K_{M\text{vlcad}}^{\text{C12CoAm}}} \cdot \frac{\text{ETF}_m}{K_{M\text{vlcad}}^{\text{ETFm}}} \right) - \left( \frac{\text{C12enoCoA}_m}{K_{M\text{vlcad}}^{\text{C12CoAm}}} \cdot \frac{\text{ETFH}_{2m}}{K_{M\text{vlcad}}^{\text{ETFm}} K_{EQ}^{\text{vlcad}}} \right)}{V_{\text{vlcad}}^{\text{DENOMINATOR}}} \quad (\text{S148})$$

$$V_{\text{vlcad}}^{\text{DENOMINATOR}} = \left( 1 + \frac{\text{C16CoA}_m}{K_{M\text{vlcad}}^{\text{C16CoAm}}} + \frac{\text{C16enoCoA}_m}{K_{M\text{vlcad}}^{\text{C16enoCoAm}}} + \frac{\text{C14CoA}_m}{K_{M\text{vlcad}}^{\text{C14CoAm}}} + \dots \right) \cdot \left( 1 + \frac{\text{ETF}_m}{K_{M\text{vlcad}}^{\text{ETFm}}} + \frac{\text{ETFH}_{2m}}{K_{M\text{vlcad}}^{\text{ETFH}_{2m}} K_{EQ}^{\text{vlcad}}} \right)$$

$$V_{\text{lcard}}^{\text{C16}} = sf_{\text{lcard}}^{\text{C16}} \cdot V_{\text{lcard}} \frac{\left( \frac{\text{C16CoA}_m}{K_{M\text{lcard}}^{\text{C16CoAm}}} \cdot \frac{\text{ETF}_m}{K_{M\text{lcard}}^{\text{ETFm}}} \right) - \left( \frac{\text{C16enoCoA}_m}{K_{M\text{lcard}}^{\text{C16CoAm}}} \cdot \frac{\text{ETFH}_{2m}}{K_{M\text{lcard}}^{\text{ETFm}} K_{EQ}^{\text{lcard}}} \right)}{V_{\text{lcard}}^{\text{DENOMINATOR}}} \quad (\text{S149})$$

$$V_{\text{lcard}}^{\text{C14}} = sf_{\text{lcard}}^{\text{C14}} \cdot V_{\text{lcard}} \frac{\left( \frac{\text{C14CoA}_m}{K_{M\text{lcard}}^{\text{C14CoAm}}} \cdot \frac{\text{ETF}_m}{K_{M\text{lcard}}^{\text{ETFm}}} \right) - \left( \frac{\text{C14enoCoA}_m}{K_{M\text{lcard}}^{\text{C14CoAm}}} \cdot \frac{\text{ETFH}_{2m}}{K_{M\text{lcard}}^{\text{ETFm}} K_{EQ}^{\text{lcard}}} \right)}{V_{\text{lcard}}^{\text{DENOMINATOR}}} \quad (\text{S150})$$

$$V_{\text{lcard}}^{\text{C12}} = sf_{\text{lcard}}^{\text{C12}} \cdot V_{\text{lcard}} \frac{\left( \frac{\text{C12CoA}_m}{K_{M\text{lcard}}^{\text{C12CoAm}}} \cdot \frac{\text{ETF}_m}{K_{M\text{lcard}}^{\text{ETFm}}} \right) - \left( \frac{\text{C12enoCoA}_m}{K_{M\text{lcard}}^{\text{C12CoAm}}} \cdot \frac{\text{ETFH}_{2m}}{K_{M\text{lcard}}^{\text{ETFm}} K_{EQ}^{\text{lcard}}} \right)}{V_{\text{lcard}}^{\text{DENOMINATOR}}} \quad (\text{S151})$$

$$V_{lcad}^{C10} = sf_{lcad}^{C10} \cdot V_{lcad} \frac{\left( \frac{C10CoA_m}{K_{M lcad}^{C10CoAm}} \cdot \frac{FAD}{K_{M lcad}^{ETFm}} \right) - \left( \frac{C10enoCoA_m}{K_{M lcad}^{C10CoAm}} \cdot \frac{FADH_2}{K_{M lcad}^{ETFm} K_{EQ}^{lcad}} \right)}{V_{lcad}^{DENOMINATOR}} \quad (S152)$$

$$V_{lcad}^{C8} = sf_{lcad}^{C8} \cdot V_{lcad} \frac{\left( \frac{C8CoA_m}{K_{M lcad}^{C8CoAm}} \cdot \frac{FAD_m}{K_{M lcad}^{ETFm}} \right) - \left( \frac{C8enoCoA_m}{K_{M lcad}^{C8CoAm}} \cdot \frac{FADH_{2m}}{K_{M lcad}^{ETFm} K_{EQ}^{lcad}} \right)}{V_{lcad}^{DENOMINATOR}} \quad (S153)$$

$$V_{lcad}^{DENOMINATOR} = \left( 1 + \frac{C16CoA_m}{K_{M lcad}^{C16CoAm}} + \frac{C16enoCoA_m}{K_{M lcad}^{C16enoCoAm}} + \frac{C14CoA_m}{K_{M lcad}^{C14CoAm}} + \frac{C14enoCoA_m}{K_{M lcad}^{C14enoCoAm}} + \dots \right) \cdot \left( 1 + \frac{ETF_m}{K_{M lcad}^{ETFm}} + \frac{ETFH_{2m}}{K_{M lcad}^{ETFH_{2m}} K_{EQ}^{lcad}} \right)$$

$$\frac{\frac{C12CoA_m}{K_{M lcad}^{C12CoAm}} + \frac{C12enoCoA_m}{K_{M lcad}^{C12enoCoAm}} + \frac{C10CoA_m}{K_{M lcad}^{C10CoAm}} + \dots}{\frac{C10enoCoA_m}{K_{M lcad}^{C10enoCoAm}} + \frac{C8CoA_m}{K_{M lcad}^{C8CoAm}} + \frac{C8enoCoA_m}{K_{M lcad}^{C8enoCoAm}}}$$

$$V_{mcd}^{C12} = sf_{mcd}^{C12} \cdot V_{mcd} \frac{\left( \frac{C12CoA_m}{K_{M mcd}^{C12CoAm}} \cdot \frac{FAD}{K_{M mcd}^{ETFm}} \right) - \left( \frac{C12enoCoA_m}{K_{M mcd}^{C12CoAm}} \cdot \frac{FADH_2}{K_{M mcd}^{ETFm} K_{EQ}^{mcd}} \right)}{V_{mcd}^{DENOMINATOR}} \quad (S154)$$

$$V_{mcd}^{C10} = sf_{mcd}^{C10} \cdot V_{mcd} \frac{\left( \frac{C10CoA_m}{K_{M mcd}^{C10CoAm}} \cdot \frac{ETF_m}{K_{M mcd}^{ETFm}} \right) - \left( \frac{C10enoCoA_m}{K_{M mcd}^{C10CoAm}} \cdot \frac{ETFH_{2m}}{K_{M mcd}^{ETFm} K_{EQ}^{mcd}} \right)}{V_{mcd}^{DENOMINATOR}} \quad (S155)$$

$$V_{mcd}^{C8} = sf_{mcd}^{C8} \cdot V_{mcd} \frac{\left( \frac{C8CoA_m}{K_{M mcd}^{C8CoAm}} \cdot \frac{ETF_m}{K_{M mcd}^{ETFm}} \right) - \left( \frac{C8enoCoA_m}{K_{M mcd}^{C8CoAm}} \cdot \frac{ETFH_{2m}}{K_{M mcd}^{ETFm} K_{EQ}^{mcd}} \right)}{V_{mcd}^{DENOMINATOR}} \quad (S156)$$

$$V_{mcd}^{C6} = sf_{mcd}^{C6} \cdot V_{mcd} \frac{\left( \frac{C6CoA_m}{K_{M mcd}^{C6CoAm}} \cdot \frac{ETF_m}{K_{M mcd}^{ETFm}} \right) - \left( \frac{C6enoCoA_m}{K_{M mcd}^{C6CoAm}} \cdot \frac{ETFH_{2m}}{K_{M mcd}^{ETFm} K_{EQ}^{mcd}} \right)}{V_{mcd}^{DENOMINATOR}} \quad (S157)$$

$$V_{mcd}^{C4} = sf_{mcd}^{C4} \cdot V_{mcd} \frac{\left( \frac{C4CoA_m}{K_{M mcd}^{C4CoAm}} \cdot \frac{ETF_m}{K_{M mcd}^{ETFm}} \right) - \left( \frac{C4enoCoA_m}{K_{M mcd}^{C4CoAm}} \cdot \frac{ETFH_{2m}}{K_{M mcd}^{ETFm} K_{EQ}^{mcd}} \right)}{V_{mcd}^{DENOMINATOR}} \quad (S158)$$

$$V_{\text{m}cad}^{\text{DENOMINATOR}} = \left( 1 + \frac{C12CoA_m}{K_{M\text{m}cad}^{C12CoAm}} + \frac{C12\text{enoCoA}_m}{K_{M\text{m}cad}^{C12\text{enoCoAm}}} + \frac{C10CoA_m}{K_{M\text{m}cad}^{C10CoAm}} + \frac{C10\text{enoCoA}_m}{K_{M\text{m}cad}^{C10\text{enoCoAm}}} + \frac{C8CoA_m}{K_{M\text{m}cad}^{C8CoAm}} + \dots \right) \cdot \left( 1 + \frac{FAD_m}{K_{M\text{m}cad}^{\text{ETFm}}} + \frac{FADH_{2m}}{K_{M\text{m}cad}^{\text{ETFH}_{2m}} K_{EQ}^{\text{m}cad}} \right)$$

$$V_{\text{scad}}^{C6} = sf_{\text{scad}}^{C6} \cdot V_{\text{scad}} \frac{\left( \frac{C6CoA_m}{K_{M\text{scad}}^{C6CoAm}} \cdot \frac{\text{ETF}_m}{K_{M\text{scad}}^{\text{ETFm}}} \right) - \left( \frac{C6\text{enoCoA}_m}{K_{M\text{scad}}^{C6\text{enoCoAm}}} \cdot \frac{\text{ETFH}_{2m}}{K_{M\text{scad}}^{\text{ETFm}} K_{EQ}^{\text{scad}}} \right)}{V_{\text{scad}}^{\text{DENOMINATOR}}} \quad (\text{S159})$$

$$V_{\text{scad}}^{C4} = sf_{\text{scad}}^{C4} \cdot V_{\text{scad}} \frac{\left( \frac{C4CoA_m}{K_{M\text{scad}}^{C4CoAm}} \cdot \frac{\text{ETF}_m}{K_{M\text{scad}}^{\text{ETFm}}} \right) - \left( \frac{C4\text{enoCoA}_m}{K_{M\text{scad}}^{C4\text{enoCoAm}}} \cdot \frac{\text{ETFH}_{2m}}{K_{M\text{scad}}^{\text{ETFm}} K_{EQ}^{\text{scad}}} \right)}{V_{\text{scad}}^{\text{DENOMINATOR}}} \quad (\text{S160})$$

$$V_{\text{scad}}^{\text{DENOMINATOR}} = \left( 1 + \frac{C6CoA_m}{K_{M\text{scad}}^{C6CoAm}} + \frac{C6\text{enoCoA}_m}{K_{M\text{scad}}^{C6\text{enoCoAm}}} + \frac{C4CoA_m}{K_{M\text{scad}}^{C4CoAm}} + \frac{C4\text{enoCoA}_m}{K_{M\text{scad}}^{C4\text{enoCoAm}}} \right) \cdot \left( 1 + \frac{\text{ETF}_m}{K_{M\text{scad}}^{\text{ETFm}}} + \frac{\text{ETFH}_{2m}}{K_{M\text{scad}}^{\text{ETFH}_{2m}} K_{EQ}^{\text{scad}}} \right)$$

### 1.2.17 Supplementary Table S9. Parameters for fatty acyl-CoA dehydrogenases (cad)

| Symbol                                  | Value                | Units               | Description                                                         |
|-----------------------------------------|----------------------|---------------------|---------------------------------------------------------------------|
| $sf_{\text{vl}cad}^{C16}$               | 1                    |                     | Scaling factor of very long acyl CoA dehydrogenase (vlcad) for PCoA |
| $sf_{\text{vl}cad}^{C14}$               | 0.8                  |                     | vlcad scaling factor for C14CoA                                     |
| $sf_{\text{vl}cad}^{C12}$               | 0.42                 |                     | vlcad scaling factor for C12CoA                                     |
| $V_{\text{vl}cad}$                      | $2.0 \times 10^{-3}$ | mM ms <sup>-1</sup> | vlcad maximal rate                                                  |
| $K_{M\text{vl}cad}^{\text{ETFm}}$       | 0.12                 | μM                  | vlcad Michaelis constant (K <sub>M</sub> ) for FAD                  |
| $K_{M\text{vl}cad}^{\text{ETFH}_{2m}}$  | 24.2                 | μM                  | vlcad K <sub>M</sub> for FADH <sub>2</sub>                          |
| $K_{M\text{vl}cad}^{C16CoAm}$           | 6.5                  | μM                  | vlcad K <sub>M</sub> for PCoA                                       |
| $K_{M\text{vl}cad}^{C16\text{enoCoAm}}$ | 1.08                 | μM                  | vlcad K <sub>M</sub> for C16enoyl-CoA                               |
| $K_{M\text{vl}cad}^{C14CoAm}$           | 4.0                  | μM                  | vlcad K <sub>M</sub> for C14-CoA                                    |
| $K_{M\text{vl}cad}^{C14\text{enoCoAm}}$ | 1.08                 | μM                  | vlcad K <sub>M</sub> for C14enoyl-CoA                               |
| $K_{M\text{vl}cad}^{C12CoAm}$           | 2.7                  | μM                  | vlcad K <sub>M</sub> for C12-CoA                                    |
| $K_{M\text{vl}cad}^{C12\text{enoCoAm}}$ | 1.08                 | μM                  | vlcad K <sub>M</sub> for C12enoyl-CoA                               |
| $K_{EQ}^{\text{vl}cad}$                 | 6.0                  |                     | vlcad equilibrium constant                                          |

| Symbol                     | Value               | Units               | Description                                                            |
|----------------------------|---------------------|---------------------|------------------------------------------------------------------------|
| $Sf_{lcad}^{C16}$          | 0.9                 |                     | Scaling factor of long-chain acyl CoA dehydrogenase (lcad) for PCoA    |
| $Sf_{lcad}^{C14}$          | 1                   |                     | lcad scaling factor for C14CoA                                         |
| $Sf_{lcad}^{C12}$          | 0.95                |                     | lcad scaling factor for C12CoA                                         |
| $Sf_{lcad}^{C10}$          | 0.85                |                     | lcad scaling factor for C10CoA                                         |
| $Sf_{lcad}^{C8}$           | 0.4                 |                     | lcad scaling factor for C8CoA                                          |
| $V_{lcad}$                 | $2.5 \cdot 10^{-3}$ | mM ms <sup>-1</sup> | lcad maximal rate                                                      |
| $K_{M lcad}^{ETFm}$        | 1.2                 | nM                  | lcad K <sub>M</sub> for FAD                                            |
| $K_{M lcad}^{ETFH_2m}$     | 24.2                | μM                  | lcad K <sub>M</sub> for FADH <sub>2</sub>                              |
| $K_{M lcad}^{C16CoAm}$     | 2.5                 | μM                  | lcad K <sub>M</sub> for PCoA                                           |
| $K_{M lcad}^{C16enoCoAm}$  | 1.08                | μM                  | lcad K <sub>M</sub> for C16Enoyl-CoA                                   |
| $K_{M lcad}^{C14CoAm}$     | 7.4                 | μM                  | lcad K <sub>M</sub> for C14-CoA                                        |
| $K_{M lcad}^{C14enoCoAm}$  | 1.08                | μM                  | lcad K <sub>M</sub> for C14enoyl-CoA                                   |
| $K_{M lcad}^{C12CoAm}$     | 9.0                 | μM                  | lcad K <sub>M</sub> for C12-CoA                                        |
| $K_{M lcad}^{C12enoCoAm}$  | 1.08                | μM                  | lcad K <sub>M</sub> for C12enoyl-CoA                                   |
| $K_{M vlcad}^{C10CoAm}$    | 24.3                | μM                  | lcad K <sub>M</sub> for C10-CoA                                        |
| $K_{M vlcad}^{C10enoCoAm}$ | 1.08                | μM                  | lcad K <sub>M</sub> for C10enoyl-CoA                                   |
| $K_{M vlcad}^{C8CoAm}$     | 12.3                | μM                  | lcad K <sub>M</sub> for C8-CoA                                         |
| $K_{M vlcad}^{C8enoCoAm}$  | 1.08                | μM                  | lcad K <sub>M</sub> for C8-enoyl-CoA                                   |
| $K_{EQ}^{lcad}$            | 6.0                 |                     | lcad equilibrium constant                                              |
| $Sf_{mcd}^{C12}$           | 0.68                |                     | Scaling factor of medium-chain acyl CoA dehydrogenase (mcd) for C12CoA |
| $Sf_{mcd}^{C10}$           | 0.8                 |                     | mcd scaling factor for C10CoA                                          |
| $Sf_{mcd}^{C8}$            | 0.87                |                     | mcd scaling factor for C8CoA                                           |
| $Sf_{mcd}^{C6}$            | 1.0                 |                     | mcd scaling factor for C6CoA                                           |
| $Sf_{mcd}^{C4}$            | 0.12                |                     | mcd scaling factor for C4CoA                                           |

| Symbol                                     | Value | Units               | Description                                                           |
|--------------------------------------------|-------|---------------------|-----------------------------------------------------------------------|
| $V_{m\text{cad}}$                          | 0.25  | mM ms <sup>-1</sup> | mcad maximal rate                                                     |
| $K_{M\text{mcad}}^{\text{ETFm}}$           | 1.2   | nM                  | mcad K <sub>M</sub> for FAD                                           |
| $K_{M\text{mcad}}^{\text{ETFH}_2\text{m}}$ | 24.2  | μM                  | mcad K <sub>M</sub> for FADH <sub>2</sub>                             |
| $K_{M\text{mcad}}^{\text{C12CoAm}}$        | 5.7   | μM                  | mcad K <sub>M</sub> for C12CoA                                        |
| $K_{M\text{mcad}}^{\text{C12enoCoAm}}$     | 1.08  | μM                  | mcad K <sub>M</sub> for C12Enoyl-CoA                                  |
| $K_{M\text{mcad}}^{\text{C10CoAm}}$        | 5.4   | μM                  | mcad K <sub>M</sub> for C10-CoA                                       |
| $K_{M\text{mcad}}^{\text{C10enoCoAm}}$     | 1.08  | μM                  | mcad K <sub>M</sub> for C10enoyl-CoA                                  |
| $K_{M\text{mcad}}^{\text{C8CoAm}}$         | 4.0   | μM                  | mcad K <sub>M</sub> for C8-CoA                                        |
| $K_{M\text{mcad}}^{\text{C8enoCoAm}}$      | 1.08  | μM                  | mcad K <sub>M</sub> for C8enoyl-CoA                                   |
| $K_{M\text{mcad}}^{\text{C6CoAm}}$         | 9.4   | μM                  | mcad K <sub>M</sub> for C6-CoA                                        |
| $K_{M\text{mcad}}^{\text{C6enoCoAm}}$      | 1.08  | μM                  | mcad K <sub>M</sub> for C6enoyl-CoA                                   |
| $K_{M\text{mcad}}^{\text{C4CoAm}}$         | 135   | μM                  | mcad K <sub>M</sub> for C4-CoA                                        |
| $K_{M\text{mcad}}^{\text{C4enoCoAm}}$      | 1.08  | μM                  | mcad K <sub>M</sub> for C4enoyl-CoA                                   |
| $K_{EQ}^{\text{mcad}}$                     | 6.0   |                     | mcad equilibrium constant                                             |
| $sf_{\text{scad}}^{\text{C6}}$             | 0.3   |                     | Scaling factor of short-chain acyl CoA dehydrogenase (scad) for C6CoA |
| $sf_{\text{scad}}^{\text{C4}}$             | 1.0   |                     | scad scaling factor for C4CoA                                         |
| $V_{\text{scad}}$                          | 0.25  | mM ms <sup>-1</sup> | scad maximal rate                                                     |
| $K_{M\text{scad}}^{\text{ETFm}}$           | 0.12  | μM                  | scad K <sub>M</sub> for FAD                                           |
| $K_{M\text{scad}}^{\text{ETFH}_2\text{m}}$ | 24.2  | μM                  | scad K <sub>M</sub> for FADH <sub>2</sub>                             |
| $K_{M\text{scad}}^{\text{C6CoAm}}$         | 285   | μM                  | scad K <sub>M</sub> for C6-CoA                                        |
| $K_{M\text{scad}}^{\text{C6enoCoAm}}$      | 1.08  | μM                  | scad K <sub>M</sub> for C6Enoyl-CoA                                   |
| $K_{M\text{scad}}^{\text{C4CoAm}}$         | 10.7  | μM                  | scad K <sub>M</sub> for C4-CoA                                        |
| $K_{M\text{scad}}^{\text{C4enoCoAm}}$      | 1.08  | μM                  | scad K <sub>M</sub> for C4Enoyl-CoA                                   |
| $K_{EQ}^{\text{scad}}$                     | 6.0   |                     | scad equilibrium constant                                             |

$V_{vlead}$ ,  $V_{lead}$ ,  $V_{mlead}$  and  $V_{scad}$  were adjusted following the criteria that they should reproduce palmitate oxidation fluxes reported in adult cardiomyocytes (Mazumder et al., 2004).

### **Fatty acid enoyl-CoA hydratase (Crotonase, CRO)**

The enzyme rate expressions were modelled as single substrate reversible reactions, with the various enoyl CoA of different chain length and hydroxyacyl CoA competing with one another (van Eunen et al., 2013).

$$V_{cro}^{C16} = sf_{cro}^{C16} \cdot V_{cro} \frac{\left( \frac{C16enoCoA_m}{K_{M\ cro}^{C16enoCoAm}} \right) - \left( \frac{C16OHC\ CoA_m}{K_{M\ cro}^{C16enoCoAm} K_{EQ}^{cro}} \right)}{V_{cro}^{DENOMINATOR}} \quad (S161)$$

$$V_{cro}^{C14} = sf_{cro}^{C14} \cdot V_{cro} \frac{\left( \frac{C14enoCoA_m}{K_{M\ cro}^{C14enoCoAm}} \right) - \left( \frac{C14OHC\ CoA_m}{K_{M\ cro}^{C14enoCoAm} K_{EQ}^{cro}} \right)}{V_{cro}^{DENOMINATOR}} \quad (S162)$$

$$V_{cro}^{C12} = sf_{cro}^{C12} \cdot V_{cro} \frac{\left( \frac{C12enoCoA_m}{K_{M\ cro}^{C12enoCoAm}} \right) - \left( \frac{C12OHC\ CoA_m}{K_{M\ cro}^{C12enoCoAm} K_{EQ}^{cro}} \right)}{V_{cro}^{DENOMINATOR}} \quad (S163)$$

$$V_{cro}^{C10} = sf_{cro}^{C10} \cdot V_{cro} \frac{\left( \frac{C10enoCoA_m}{K_{M\ cro}^{C10enoCoAm}} \right) - \left( \frac{C10OHC\ CoA_m}{K_{M\ cro}^{C10enoCoAm} K_{EQ}^{cro}} \right)}{V_{cro}^{DENOMINATOR}} \quad (S164)$$

$$V_{cro}^{C8} = sf_{cro}^{C8} \cdot V_{cro} \frac{\left( \frac{C8enoCoA_m}{K_{M\ cro}^{C8enoCoAm}} \right) - \left( \frac{C8OHC\ CoA_m}{K_{M\ cro}^{C8enoCoAm} K_{EQ}^{cro}} \right)}{V_{cro}^{DENOMINATOR}} \quad (S165)$$

$$V_{cro}^{C6} = sf_{cro}^{C6} \cdot V_{cro} \frac{\left( \frac{C6enoCoA_m}{K_{M\ cro}^{C6enoCoAm}} \right) - \left( \frac{C6OHC\ CoA_m}{K_{M\ cro}^{C6enoCoAm} K_{EQ}^{cro}} \right)}{V_{cro}^{DENOMINATOR}} \quad (S166)$$

$$V_{cro}^{C4} = sf_{cro}^{C4} \cdot V_{cro} \frac{\left( \frac{C4enoCoA_m}{K_{M\ cro}^{C4enoCoAm}} \right) - \left( \frac{C4OHC\ CoA_m}{K_{M\ cro}^{C4enoCoAm} K_{EQ}^{cro}} \right)}{V_{cro}^{DENOMINATOR}} \quad (S167)$$



$$V_{cro}^{DENOMINATOR} = \left( 1 + \frac{C16enoCoA_m}{K_{M\ cro}^{C16enoCoAm}} + \frac{C16OHCoA_m}{K_{M\ cro}^{C16OHCoAm}} + \frac{C14enoCoA_m}{K_{M\ cro}^{C14enoCoAm}} + \frac{C14OHCoA_m}{K_{M\ cro}^{C14OHCoAm}} + \dots \right. \\ \left. \frac{C12enoCoA_m}{K_{M\ cro}^{C12enoCoAm}} + \frac{C12OHCoA_m}{K_{M\ cro}^{C12OHCoAm}} + \frac{C10enoCoA_m}{K_{M\ cro}^{C10enoCoAm}} + \frac{C10OHCoA_m}{K_{M\ cro}^{C10OHCoAm}} + \dots \right. \\ \left. \frac{C8enoCoA_m}{K_{M\ cro}^{C8enoCoAm}} + \frac{C8OHCoA_m}{K_{M\ cro}^{C8OHCoAm}} + \frac{C6enoCoA_m}{K_{M\ cro}^{C6enoCoAm}} + \frac{C6OHCoA_m}{K_{M\ cro}^{C6OHCoAm}} + \dots \right. \\ \left. \frac{C4enoCoA_m}{K_{M\ cro}^{C4enoCoAm}} + \frac{C4OHCoA_m}{K_{M\ cro}^{C4OHCoAm}} \right) + \frac{AceAcCoA_m}{K_{i\ cro}^{AcAcCoAm}}$$

**1.2.18 Supplementary Table S10. Parameters for fatty acylenoyl-CoA hydratase (cro)**

| Symbol                    | Value | Units               | Description                                               |
|---------------------------|-------|---------------------|-----------------------------------------------------------|
| $sf_{cro}^{C16}$          | 0.13  |                     | cro scaling factor for C16enoylCoA                        |
| $sf_{cro}^{C14}$          | 0.2   |                     | cro scaling factor for C14enoylCoA                        |
| $sf_{cro}^{C12}$          | 0.25  |                     | cro scaling factor for C12enoylCoA                        |
| $sf_{cro}^{C10}$          | 0.33  |                     | cro scaling factor for C10enoylCoA                        |
| $sf_{cro}^{C8}$           | 0.58  |                     | cro scaling factor for C8enoylCoA                         |
| $sf_{cro}^{C6}$           | 0.8   |                     | cro scaling factor for C6enoylCoA                         |
| $sf_{cro}^{C4}$           | 1.0   |                     | cro scaling factor for C4enoylCoA                         |
| $V_{cro}$                 | 0.27  | mM ms <sup>-1</sup> | cro maximal rate                                          |
| $K_{M\ cro}^{C16enoCoAm}$ | 0.15  | mM                  | cro Michaelis constant (K <sub>M</sub> ) for C16Enoyl-CoA |
| $K_{M\ cro}^{C16OHCoAm}$  | 45    | μM                  | cro K <sub>M</sub> for C16OH-CoA                          |
| $K_{M\ cro}^{C14enoCoAm}$ | 0.1   | mM                  | cro K <sub>M</sub> for C14Enoyl-CoA                       |
| $K_{M\ cro}^{C14OHCoAm}$  | 45    | μM                  | cro K <sub>M</sub> for C14OH-CoA                          |
| $K_{M\ cro}^{C12enoCoAm}$ | 25    | μM                  | cro K <sub>M</sub> for C12Enoyl-CoA                       |
| $K_{M\ cro}^{C12OHCoAm}$  | 45    | μM                  | cro K <sub>M</sub> for C12OH-CoA                          |
| $K_{M\ cro}^{C10enoCoAm}$ | 25    | μM                  | cro K <sub>M</sub> for C10Enoyl-CoA                       |
| $K_{M\ cro}^{C10OHCoAm}$  | 45    | μM                  | cro K <sub>M</sub> for C10OH-CoA                          |
| $K_{M\ cro}^{C8enoCoAm}$  | 25    | μM                  | cro K <sub>M</sub> for C8Enoyl-CoA                        |

| Symbol                              | Value | Units         | Description                            |
|-------------------------------------|-------|---------------|----------------------------------------|
| $K_{M\ cro}^{C8OHC\o A_m}$          | 45    | $\mu\text{M}$ | cro $K_M$ for C8OH-CoA                 |
| $K_{M\ cro}^{C6\text{eno}Co\o A_m}$ | 25    | $\mu\text{M}$ | cro $K_M$ for C6Enoyl-CoA              |
| $K_{M\ cro}^{C6OHC\o A_m}$          | 45    | $\mu\text{M}$ | cro $K_M$ for C6OH-CoA                 |
| $K_{M\ cro}^{C4\text{eno}Co\o A_m}$ | 40    | $\mu\text{M}$ | cro $K_M$ for C4Enoyl-CoA              |
| $K_{M\ cro}^{C4OHC\o A_m}$          | 45    | $\mu\text{M}$ | cro $K_M$ for C4OH-CoA                 |
| $K_{EQ}^{cro}$                      | 3.13  |               | cro equilibrium constant               |
| $K_{i\ cro}^{AcAcCo\o A_m}$         | 1.6   | $\mu\text{M}$ | cro inhibition constant for AcetoAcCoA |

All parameter values were taken from (Cortassa et al., 2017a) and (van Eunen et al., 2013).

### *Medium/short-chain hydroxyacyl-CoA dehydrogenase (mschad)*

The enzyme's rate expressions were modelled as bi-reactant reversible reactions, coupled to the reduction of  $\text{NAD}^+$  and with the various hydroxyacyl CoA and ketoacyl CoA competing for the same enzyme pool (van Eunen et al., 2013).

$$V_{mschad}^{C16} = sf_{mschad}^{C16} \cdot V_{mschad} \frac{\left( \frac{C16OHC\o A_m}{K_{M\ mschad}^{C16OHC\o A_m}} \cdot \frac{NAD_m}{K_{M\ mschad}^{NADm}} \right) - \left( \frac{C16ketoCo\o A_m}{K_{M\ mschad}^{C16OHC\o A_m}} \cdot \frac{NADH_m}{K_{M\ mschad}^{NADm} K_{EQ}^{mschad}} \right)}{V_{MSCHAD}^{DENOMINATOR}} \quad (\text{S168})$$

$$V_{mschad}^{C14} = sf_{mschad}^{C14} \cdot V_{mschad} \frac{\left( \frac{C14OHC\o A_m}{K_{M\ mschad}^{C14OHC\o A_m}} \cdot \frac{NAD_m}{K_{M\ mschad}^{NADm}} \right) - \left( \frac{C14ketoCo\o A_m}{K_{M\ mschad}^{C14OHC\o A_m}} \cdot \frac{NADH_m}{K_{M\ mschad}^{NADm} K_{EQ}^{mschad}} \right)}{V_{MSCHAD}^{DENOMINATOR}} \quad (\text{S169})$$

$$V_{mschad}^{C12} = sf_{mschad}^{C12} \cdot V_{mschad} \frac{\left( \frac{C12OHC\o A_m}{K_{M\ mschad}^{C12OHC\o A_m}} \cdot \frac{NAD_m}{K_{M\ mschad}^{NADm}} \right) - \left( \frac{C12ketoCo\o A_m}{K_{M\ mschad}^{C12OHC\o A_m}} \cdot \frac{NADH_m}{K_{M\ mschad}^{NADm} K_{EQ}^{mschad}} \right)}{V_{MSCHAD}^{DENOMINATOR}} \quad (\text{S170})$$

$$V_{mschad}^{C10} = sf_{mschad}^{C10} \cdot V_{mschad} \frac{\left( \frac{C10OHC\o A_m}{K_{M\ mschad}^{C10OHC\o A_m}} \cdot \frac{NAD_m}{K_{M\ mschad}^{NADm}} \right) - \left( \frac{C10ketoCo\o A_m}{K_{M\ mschad}^{C10OHC\o A_m}} \cdot \frac{NADH_m}{K_{M\ mschad}^{NADm} K_{EQ}^{mschad}} \right)}{V_{MSCHAD}^{DENOMINATOR}} \quad (\text{S171})$$

$$V_{mschad}^{C8} = sf_{mschad}^{C8} \cdot V_{mschad} \frac{\left( \frac{C8OHC\o A_m}{K_{M\ mschad}^{C8OHC\o A_m}} \cdot \frac{NAD_m}{K_{M\ mschad}^{NADm}} \right) - \left( \frac{C8ketoCo\o A_m}{K_{M\ mschad}^{C8OHC\o A_m}} \cdot \frac{NADH_m}{K_{M\ mschad}^{NADm} K_{EQ}^{mschad}} \right)}{V_{MSCHAD}^{DENOMINATOR}} \quad (\text{S172})$$

$$V_{mschad}^{C6} = sf_{mschad}^{C6} \cdot V_{mschad} \frac{\left( \frac{C6OHC\text{CoA}_m}{K_{M\ mschad}^{C6OHC\text{CoA}_m}} \cdot \frac{NAD_m}{K_{M\ mschad}^{NADm}} \right) - \left( \frac{C6keto\text{CoA}_m}{K_{M\ mschad}^{C6OHC\text{CoA}_m}} \cdot \frac{NADH_m}{K_{M\ mschad}^{NADm} K_{EQ}^{mschad}} \right)}{V_{MSCHAD}^{DENOMINATOR}} \quad (S173)$$

$$V_{mschad}^{C4} = sf_{mschad}^{C4} \cdot V_{mschad} \frac{\left( \frac{C4OHC\text{CoA}_m}{K_{M\ mschad}^{C4OHC\text{CoA}_m}} \cdot \frac{NAD_m}{K_{M\ mschad}^{NADm}} \right) - \left( \frac{C4keto\text{CoA}_m}{K_{M\ mschad}^{C4OHC\text{CoA}_m}} \cdot \frac{NADH_m}{K_{M\ mschad}^{NADm} K_{EQ}^{mschad}} \right)}{V_{MSCHAD}^{DENOMINATOR}} \quad (S174)$$

$$V_{MSCHAD}^{DENOMINATOR} = \left( 1 + \frac{C16OHC\text{CoA}_m}{K_{M\ mschad}^{C16OHC\text{CoA}_m}} + \frac{C16keto\text{CoA}_m}{K_{M\ mschad}^{C16keto\text{CoA}_m}} + \frac{C14OHC\text{CoA}_m}{K_{M\ mschad}^{C14OHC\text{CoA}_m}} + \frac{C14keto\text{CoA}_m}{K_{M\ mschad}^{C14keto\text{CoA}_m}} + \dots \right. \\ \left. \frac{C12OHC\text{CoA}_m}{K_{M\ mschad}^{C12OHC\text{CoA}_m}} + \frac{C12keto\text{CoA}_m}{K_{M\ mschad}^{C12keto\text{CoA}_m}} + \frac{C10OHC\text{CoA}_m}{K_{M\ mschad}^{C10OHC\text{CoA}_m}} + \frac{C10keto\text{CoA}_m}{K_{M\ mschad}^{C10keto\text{CoA}_m}} + \dots \right. \\ \left. \frac{C8OHC\text{CoA}_m}{K_{M\ mschad}^{C8OHC\text{CoA}_m}} + \frac{C8keto\text{CoA}_m}{K_{M\ mschad}^{C8keto\text{CoA}_m}} + \frac{C6OHC\text{CoA}_m}{K_{M\ mschad}^{C6OHC\text{CoA}_m}} + \frac{C6keto\text{CoA}_m}{K_{M\ mschad}^{C6keto\text{CoA}_m}} + \dots \right. \\ \left. \frac{C4OHC\text{CoA}_m}{K_{M\ mschad}^{C4OHC\text{CoA}_m}} + \frac{C4keto\text{CoA}_m}{K_{M\ mschad}^{C4keto\text{CoA}_m}} \right) \left( 1 + \frac{NAD_m}{K_{M\ mschad}^{NADm}} + \frac{NADH_m}{K_{M\ mschad}^{NADHm}} \right)$$

### 1.2.19 Supplementary Table S11. Parameter values for medium/short-chain hydroxyacyl-CoA dehydrogenase (mschad)

| Symbol                                | Value | Units               | Description                                   |
|---------------------------------------|-------|---------------------|-----------------------------------------------|
| $sf_{mschad}^{C16}$                   | 0.6   |                     | Scaling factor of mschad for C16OHC\text{CoA} |
| $sf_{mschad}^{C14}$                   | 0.5   |                     | Scaling factor of mschad for C14OHC\text{CoA} |
| $sf_{mschad}^{C12}$                   | 0.43  |                     | Scaling factor of mschad for C12OHC\text{CoA} |
| $sf_{mschad}^{C10}$                   | 0.64  |                     | Scaling factor of mschad for C10OHC\text{CoA} |
| $sf_{mschad}^{C8}$                    | 0.89  |                     | Scaling factor of mschad for C8OHC\text{CoA}  |
| $sf_{mschad}^{C6}$                    | 1.0   |                     | Scaling factor of mschad for C6OHC\text{CoA}  |
| $sf_{mschad}^{C4}$                    | 0.67  |                     | Scaling factor of mschad for C4OHC\text{CoA}  |
| $V_{mschad}$                          | 0.5   | mM ms <sup>-1</sup> | mschad maximal rate                           |
| $K_{M\ mschad}^{C16OHC\text{CoA}_m}$  | 1.5   | μM                  | mschad K <sub>M</sub> for C16OHC\text{CoA}    |
| $K_{M\ mschad}^{C16keto\text{CoA}_m}$ | 1.4   | μM                  | mschad K <sub>M</sub> for C16keto\text{CoA}   |
| $K_{M\ mschad}^{C14OHC\text{CoA}_m}$  | 1.8   | μM                  | mschad K <sub>M</sub> for C14OHC\text{CoA}    |
| $K_{M\ mschad}^{C14keto\text{CoA}_m}$ | 1.4   | μM                  | mschad K <sub>M</sub> for C14keto\text{CoA}   |

| Symbol                           | Value                 | Units         | Description                       |
|----------------------------------|-----------------------|---------------|-----------------------------------|
| $K_{M\ mschad}^{C12OHC\o A_m}$   | 3.7                   | $\mu\text{M}$ | mschad $K_M$ for C12OHC $\o$ A    |
| $K_{M\ mschad}^{C12keto\ CoA_m}$ | 1.6                   | $\mu\text{M}$ | mschad $K_M$ for C12ketoCoA       |
| $K_{M\ mschad}^{C10OHC\o A_m}$   | 8.8                   | $\mu\text{M}$ | mschad $K_M$ for C10OHC $\o$ A    |
| $K_{M\ mschad}^{C10keto\ CoA_m}$ | 2.3                   | $\mu\text{M}$ | mschad $K_M$ for C10ketoCoA       |
| $K_{M\ mschad}^{C8OHC\o A_m}$    | 16.3                  | $\mu\text{M}$ | mschad $K_M$ for C8OHC $\o$ A     |
| $K_{M\ mschad}^{C8keto\ CoA_m}$  | 4.1                   | $\mu\text{M}$ | mschad $K_M$ for C8ketoCoA        |
| $K_{M\ mschad}^{C6OHC\o A_m}$    | 28.6                  | $\mu\text{M}$ | mschad $K_M$ for C6OHC $\o$ A     |
| $K_{M\ mschad}^{C6keto\ CoA_m}$  | 5.8                   | $\mu\text{M}$ | mschad $K_M$ for C6ketoCoA        |
| $K_{M\ mschad}^{C4OHC\o A_m}$    | 69.9                  | $\mu\text{M}$ | mschad $K_M$ for C4OHC $\o$ A     |
| $K_{M\ mschad}^{C4keto\ CoA_m}$  | 16.9                  | $\mu\text{M}$ | mschad $K_M$ for C4ketoCoA        |
| $K_{M\ mschad}^{NADm}$           | 58.5                  | $\mu\text{M}$ | mschad $K_M$ for NAD <sup>+</sup> |
| $K_{M\ mschad}^{NADHm}$          | 5.4                   | $\mu\text{M}$ | mschad $K_M$ for NADH             |
| $K_{EQ}^{mschad}$                | $2.17 \times 10^{-4}$ |               | mschad equilibrium constant       |

$V_{mschad}$  was adjusted following the same criteria indicated in Supplementary Material Table 9. Other parameters were taken from (van Eunen et al., 2013).

### **Medium-chain ketoacyl-CoA thiolase (MCKAT)**

The cleavage step rate expressions were modelled as bi-reactant reversible reactions, producing Acyl CoA and requiring CoASH as substrate (van Eunen et al., 2013).

$$V_{mckat}^{C16} = sf_{mckat}^{C16} \cdot V_{mckat} \frac{\left( \frac{C16ketoCoA_m}{K_{M\ mckat}^{C16ketoCoA_m}} \cdot \frac{CoA_m}{K_{M\ mckat}^{CoA_m}} \right) - \left( \frac{C14CoA_m}{K_{M\ mckat}^{C16ketoCoA_m}} \cdot \frac{AcCoA_m}{K_{M\ mckat}^{CoA_m} K_{EQ}^{mckat}} \right)}{V_{MCKAT}^{DENOMINATOR}} \quad (S175)$$

$$V_{mckat}^{C14} = sf_{mckat}^{C14} \cdot V_{mckat} \frac{\left( \frac{C14ketoCoA_m}{K_{M\ mckat}^{C14ketoCoA_m}} \cdot \frac{CoA_m}{K_{M\ mckat}^{CoA_m}} \right) - \left( \frac{C12CoA_m}{K_{M\ mckat}^{C14ketoCoA_m}} \cdot \frac{AcCoA_m}{K_{M\ mckat}^{CoA_m} K_{EQ}^{mckat}} \right)}{V_{MCKAT}^{DENOMINATOR}} \quad (S176)$$

$$V_{mckat}^{C12} = sf_{mckat}^{C12} \cdot V_{mckat} \frac{\left( \frac{C12ketoCoA_m \cdot CoA_m}{K_{M\ mckat}^{C12ketoCoAm}} \cdot \frac{CoA_m}{K_{M\ mckat}^{CoAm}} \right) - \left( \frac{C10CoA_m}{K_{M\ mckat}^{C12ketoCoAm}} \cdot \frac{AcCoA_m}{K_{M\ mckat}^{CoAm} K_{EQ}^{mckat}} \right)}{V_{MCKAT}^{DENOMINATOR}} \quad (S177)$$

$$V_{mckat}^{C10} = sf_{mckat}^{C10} \cdot V_{mckat} \frac{\left( \frac{C10ketoCoA_m \cdot CoA_m}{K_{M\ mckat}^{C10ketoCoAm}} \cdot \frac{CoA_m}{K_{M\ mckat}^{CoAm}} \right) - \left( \frac{C8CoA_m}{K_{M\ mckat}^{C10ketoCoAm}} \cdot \frac{AcCoA_m}{K_{M\ mckat}^{CoAm} K_{EQ}^{mckat}} \right)}{V_{MCKAT}^{DENOMINATOR}} \quad (S178)$$

$$V_{mckat}^{C8} = sf_{mckat}^{C8} \cdot V_{mckat} \frac{\left( \frac{C8ketoCoA_m \cdot CoA_m}{K_{M\ mckat}^{C8ketoCoAm}} \cdot \frac{CoA_m}{K_{M\ mckat}^{CoAm}} \right) - \left( \frac{C6CoA_m}{K_{M\ mckat}^{C8ketoCoAm}} \cdot \frac{AcCoA_m}{K_{M\ mckat}^{CoAm} K_{EQ}^{mckat}} \right)}{V_{MCKAT}^{DENOMINATOR}} \quad (S179)$$

$$V_{mckat}^{C6} = sf_{mckat}^{C6} \cdot V_{mckat} \frac{\left( \frac{C6ketoCoA_m \cdot CoA_m}{K_{M\ mckat}^{C6ketoCoAm}} \cdot \frac{CoA_m}{K_{M\ mckat}^{CoAm}} \right) - \left( \frac{C4CoA_m}{K_{M\ mckat}^{C6ketoCoAm}} \cdot \frac{AcCoA_m}{K_{M\ mckat}^{CoAm} K_{EQ}^{mckat}} \right)}{V_{MCKAT}^{DENOMINATOR}} \quad (S180)$$

$$V_{mckat}^{C4} = sf_{mckat}^{C4} \cdot V_{mckat} \frac{\left( \frac{C4ketoCoA_m \cdot CoA_m}{K_{M\ mckat}^{C4ketoCoAm}} \cdot \frac{CoA_m}{K_{M\ mckat}^{CoAm}} \right) - \left( \frac{AcCoA_m}{K_{M\ mckat}^{C4ketoCoAm}} \cdot \frac{AcCoA_m}{K_{M\ mckat}^{CoAm} K_{EQ}^{mckat}} \right)}{V_{MCKAT}^{DENOMINATOR}} \quad (S181)$$

$$V_{MCKAT}^{DENOMINATOR} = \left( 1 + \frac{C16ketoCoA_m}{K_{M\ mckat}^{C16ketoCoAm}} + \frac{C14CoA_m}{K_{M\ mckat}^{C14CoAm}} + \frac{C14ketoCoA_m}{K_{M\ mckat}^{C14ketoCoAm}} + \frac{C12CoA_m}{K_{M\ mckat}^{C12CoAm}} + \dots \right) \left( 1 + \frac{CoA_m}{K_{M\ mckat}^{CoAm}} + \frac{AcCoA_m}{K_{M\ mckat}^{AcCoAm}} \right)$$

$$V_{MCKAT}^{DENOMINATOR} = \left( \frac{C12ketoCoA_m}{K_{M\ mckat}^{C12ketoCoAm}} + \frac{C10CoA_m}{K_{M\ mckat}^{C10CoAm}} + \frac{C10ketoCoA_m}{K_{M\ mckat}^{C10ketoCoAm}} + \frac{C8CoA_m}{K_{M\ mckat}^{C8CoAm}} + \dots \right) \left( 1 + \frac{CoA_m}{K_{M\ mckat}^{CoAm}} + \frac{AcCoA_m}{K_{M\ mckat}^{AcCoAm}} \right)$$

$$V_{MCKAT}^{DENOMINATOR} = \left( \frac{C8ketoCoA_m}{K_{M\ mckat}^{C8ketoCoAm}} + \frac{C6CoA_m}{K_{M\ mckat}^{C6CoAm}} + \frac{C6ketoCoA_m}{K_{M\ mckat}^{C6ketoCoAm}} + \frac{C4CoA_m}{K_{M\ mckat}^{C4CoAm}} + \dots \right) \left( 1 + \frac{CoA_m}{K_{M\ mckat}^{CoAm}} + \frac{AcCoA_m}{K_{M\ mckat}^{AcCoAm}} \right)$$

$$V_{MCKAT}^{DENOMINATOR} = \left( \frac{C4ketoCoA_m}{K_{M\ mckat}^{C4ketoCoAm}} + \frac{AcCoA_m}{K_{M\ mckat}^{AcCoAm}} \right) \left( 1 + \frac{CoA_m}{K_{M\ mckat}^{CoAm}} + \frac{AcCoA_m}{K_{M\ mckat}^{AcCoAm}} \right)$$

### 1.2.20 Supplementary Table S12. Parameters for medium-chain ketoacyl-CoA thiolase (mckat)

| Symbol             | Value | Units | Description                         |
|--------------------|-------|-------|-------------------------------------|
| $sf_{mckat}^{C16}$ | 0.2   |       | mckat scaling factor for C16ketoCoA |
| $sf_{mckat}^{C14}$ | 0.2   |       | mckat scaling factor for C14ketoCoA |
| $sf_{mckat}^{C12}$ | 0.38  |       | mckat scaling factor for C12ketoCoA |
| $sf_{mckat}^{C10}$ | 0.75  |       | mckat scaling factor for C10ketoCoA |

| Symbol                       | Value  | Units               | Description                                        |
|------------------------------|--------|---------------------|----------------------------------------------------|
| $Sf_{mckat}^{C8}$            | 0.81   |                     | mckat scaling factor for C8ketoCoA                 |
| $Sf_{mckat}^{C6}$            | 1.0    |                     | mckat scaling factor for C6ketoCoA                 |
| $Sf_{mckat}^{C4}$            | 0.49   |                     | mckat scaling factor for C4ketoCoA                 |
| $V_{mckat}$                  | 0.1884 | mM ms <sup>-1</sup> | mckat maximal rate                                 |
| $K_{M\ mckat}^{CoAm}$        | 26.6   | μM                  | mckat Michaelis constant (K <sub>M</sub> ) for CoA |
| $K_{M\ mckat}^{AcCoAm}$      | 30     |                     | mckat K <sub>M</sub> for AcCoA                     |
| $K_{M\ mckat}^{C16ketoCoAm}$ | 1.1    | μM                  | mckat K <sub>M</sub> for C16ketoCoA                |
| $K_{M\ mckat}^{C14CoAm}$     | 13.83  | μM                  | mckat K <sub>M</sub> for C14CoA                    |
| $K_{M\ mckat}^{C14ketoCoAm}$ | 1.2    | μM                  | mckat K <sub>M</sub> for C14ketoCoA                |
| $K_{M\ mckat}^{C12CoAm}$     | 13.83  | μM                  | mckat K <sub>M</sub> for C12CoA                    |
| $K_{M\ mckat}^{C12ketoCoAm}$ | 1.3    | μM                  | mckat K <sub>M</sub> for C12ketoCoA                |
| $K_{M\ mckat}^{C10CoAm}$     | 13.83  | μM                  | mckat K <sub>M</sub> for C10CoA                    |
| $K_{M\ mckat}^{C10ketoCoAm}$ | 2.1    | μM                  | mckat K <sub>M</sub> for C10ketoCoA                |
| $K_{M\ mckat}^{C8CoAm}$      | 13.83  | μM                  | mckat K <sub>M</sub> for C8CoA                     |
| $K_{M\ mckat}^{C8ketoCoAm}$  | 3.2    | μM                  | mckat K <sub>M</sub> for C8ketoCoA                 |
| $K_{M\ mckat}^{C6CoAm}$      | 13.83  | μM                  | mckat K <sub>M</sub> for C6CoA                     |
| $K_{M\ mckat}^{C6ketoCoAm}$  | 6.7    | μM                  | mckat K <sub>M</sub> for C6ketoCoA                 |
| $K_{M\ mckat}^{C4CoAm}$      | 13.83  | μM                  | mckat K <sub>M</sub> for C4CoA                     |
| $K_{M\ mckat}^{C4ketoCoAm}$  | 12.4   | μM                  | mckat K <sub>M</sub> for C4ketoCoA                 |
| $K_{EQ}^{mckat}$             | 1051   |                     | mckat equilibrium constant                         |

$V_{mschad}$  was adjusted following the same criteria indicated in Supplementary Material Table 9. Other parameters were taken from (van Eunen et al., 2013).

### ***Mitochondrial trifunctional protein (mtp)***

The multienzyme complex encompassing the steps catalyzed by acylenoyl-CoA hydratase, hydroxyacyl-CoA dehydrogenase and the ketoacyl-CoA thiolase was modeled as a terreactant

reversible reaction, using enoyl CoA intermediates,  $NAD^+$  and CoASH and generating AcylCoA, NADH and AcCoA.

$$V_{mtp}^{C16} = sf_{mtp}^{C16} \cdot V_{mtp} \frac{\left( \frac{C16enoCoA_m}{K_{M mtp}^{C16enoCoAm}} \cdot \frac{CoA_m}{K_{M mtp}^{CoAm}} \cdot \frac{NAD_m}{K_{M mtp}^{NADm}} \right) - \left( \frac{C14CoA_m}{K_{M mtp}^{C16enoCoAm}} \cdot \frac{NADH_m}{K_{M mtp}^{NADm}} \cdot \frac{AcCoA_m}{K_{M mtp}^{CoAm} K_{EQ}^{mtp}} \right)}{V_{MTP}^{DENOMINATOR}} \quad (S182)$$

$$V_{mtp}^{C14} = sf_{mtp}^{C14} \cdot V_{mtp} \frac{\left( \frac{C14enoCoA_m}{K_{M mtp}^{C14enoCoAm}} \cdot \frac{CoA_m}{K_{M mtp}^{CoAm}} \cdot \frac{NAD_m}{K_{M mtp}^{NADm}} \right) - \left( \frac{C12CoA_m}{K_{M mtp}^{C14enoCoAm}} \cdot \frac{NADH_m}{K_{M mtp}^{NADm}} \cdot \frac{AcCoA_m}{K_{M mtp}^{CoAm} K_{EQ}^{mtp}} \right)}{V_{MTP}^{DENOMINATOR}} \quad (S183)$$

$$V_{mtp}^{C12} = sf_{mtp}^{C12} \cdot V_{mtp} \frac{\left( \frac{C12enoCoA_m}{K_{M mtp}^{C12enoCoAm}} \cdot \frac{CoA_m}{K_{M mtp}^{CoAm}} \cdot \frac{NAD_m}{K_{M mtp}^{NADm}} \right) - \left( \frac{C10CoA_m}{K_{M mtp}^{C12enoCoAm}} \cdot \frac{NADH_m}{K_{M mtp}^{NADm}} \cdot \frac{AcCoA_m}{K_{M mtp}^{CoAm} K_{EQ}^{mtp}} \right)}{V_{MTP}^{DENOMINATOR}} \quad (S184)$$

$$V_{mtp}^{C10} = sf_{mtp}^{C10} \cdot V_{mtp} \frac{\left( \frac{C10enoCoA_m}{K_{M mtp}^{C10enoCoAm}} \cdot \frac{CoA_m}{K_{M mtp}^{CoAm}} \cdot \frac{NAD_m}{K_{M mtp}^{NADm}} \right) - \left( \frac{C8CoA_m}{K_{M mtp}^{C10enoCoAm}} \cdot \frac{NADH_m}{K_{M mtp}^{NADm}} \cdot \frac{AcCoA_m}{K_{M mtp}^{CoAm} K_{EQ}^{mtp}} \right)}{V_{MTP}^{DENOMINATOR}} \quad (S185)$$

$$V_{mtp}^{C8} = sf_{mtp}^{C8} \cdot V_{mtp} \frac{\left( \frac{C8enoCoA_m}{K_{M mtp}^{C8enoCoAm}} \cdot \frac{CoA_m}{K_{M mtp}^{CoAm}} \cdot \frac{NAD_m}{K_{M mtp}^{NADm}} \right) - \left( \frac{C6CoA_m}{K_{M mtp}^{C8enoCoAm}} \cdot \frac{NADH_m}{K_{M mtp}^{NADm}} \cdot \frac{AcCoA_m}{K_{M mtp}^{CoAm} K_{EQ}^{mtp}} \right)}{V_{MTP}^{DENOMINATOR}} \quad (S186)$$

$$V_{MTP}^{DENOMINATOR} = \left( 1 + \frac{C16enoCoA_m}{K_{M mtp}^{C16enoCoAm}} + \frac{C14CoA_m}{K_{M mtp}^{C14CoAm}} + \frac{C14enoCoA_m}{K_{M mtp}^{C14enoCoAm}} + \dots \right) \left( 1 + \frac{CoA_m}{K_{M mtp}^{CoAm}} + \frac{AcCoA_m}{K_{M mtp}^{AcCoAm}} \right) \left( 1 + \frac{NAD_m}{K_{M mtp}^{NADm}} + \frac{NADH_m}{K_{M mtp}^{NADHm}} \right) \\ \left( \frac{C12CoA_m}{K_{M mtp}^{C12CoAm}} + \frac{C12enoCoA_m}{K_{M mtp}^{C12enoCoAm}} + \frac{C10CoA_m}{K_{M mtp}^{C10CoAm}} + \dots \right) \\ \left( \frac{C10enoCoA_m}{K_{M mtp}^{C10enoCoAm}} + \frac{C8CoA_m}{K_{M mtp}^{C8CoAm}} + \frac{C8enoCoA_m}{K_{M mtp}^{C8enoCoAm}} + \dots \right) \\ \left( \frac{C6CoA_m}{K_{M mtp}^{C6CoAm}} + \frac{AcetoAcCoA_m}{K_{i mtp}^{AcAcCoAm}} \right)$$

### 1.2.21 Supplementary Table S13. Parameters for mitochondrial trifunctional protein (mtp)

| Symbol           | Value | Units | Description                        |
|------------------|-------|-------|------------------------------------|
| $sf_{mtp}^{C16}$ | 1.5   |       | mtp scaling factor for C16enoylCoA |
| $sf_{mto}^{C14}$ | 0.9   |       | mtp scaling factor for C14enoylCoA |

| Symbol                    | Value | Units               | Description                                                   |
|---------------------------|-------|---------------------|---------------------------------------------------------------|
| $Sf_{mtp}^{C12}$          | 0.81  |                     | mtp scaling factor for C12enoylCoA                            |
| $Sf_{mtp}^{C10}$          | 0.73  |                     | mtp scaling factor for C10enoylCoA                            |
| $Sf_{mtp}^{C8}$           | 0.64  |                     | mtp scaling factor for C8enoylCoA                             |
| $V_{mtp}$                 | 0.142 | mM ms <sup>-1</sup> | mtp maximal rate                                              |
| $K_{M\ mtp}^{NAD\ m}$     | 60    | μM                  | mtp Michaelis constant (K <sub>M</sub> ) for NAD <sup>+</sup> |
| $K_{M\ mtp}^{NADH\ m}$    | 50    | μM                  | mtp K <sub>M</sub> for NADH                                   |
| $K_{M\ mtp}^{CoAm}$       | 30    | μM                  | mtp K <sub>M</sub> for CoA                                    |
| $K_{M\ mtp}^{AcCoAm}$     | 30    | μM                  | mtp K <sub>M</sub> for AcCoA                                  |
| $K_{M\ mtp}^{C16enoCoAm}$ | 25    | μM                  | mtp K <sub>M</sub> for C16 enoylCoA                           |
| $K_{M\ mtp}^{C14enoCoAm}$ | 25    | μM                  | mtp K <sub>M</sub> for C14 enoylCoA                           |
| $K_{M\ mtp}^{C12enoCoAm}$ | 25    | μM                  | mtp K <sub>M</sub> for C12 enoylCoA                           |
| $K_{M\ mtp}^{C10enoCoAm}$ | 25    | μM                  | mtp K <sub>M</sub> for C10 enoylCoA                           |
| $K_{M\ mtp}^{C8enoCoAm}$  | 25    | μM                  | mtp K <sub>M</sub> for C8 enoylCoA                            |
| $K_{M\ mtp}^{C14CoAm}$    | 13.83 | μM                  | mtp K <sub>M</sub> for C14 CoA                                |
| $K_{M\ mtp}^{C12CoAm}$    | 13.83 | μM                  | mtp K <sub>M</sub> for C12 CoA                                |
| $K_{M\ mtp}^{C10CoAm}$    | 13.83 | μM                  | mtp K <sub>M</sub> for C10 CoA                                |
| $K_{M\ mtp}^{C8CoAm}$     | 13.83 | μM                  | mtp K <sub>M</sub> for C8 CoA                                 |
| $K_{M\ mtp}^{C6CoAm}$     | 13.83 | μM                  | mtp K <sub>M</sub> for C6 CoA                                 |
| $K_{M\ mtp}^{AcAcCoAm}$   | 30    | μM                  | mtp inhibition constant by AcAcCoA                            |
| $K_{EQ}^{mtp}$            | 0.71  |                     | mtp equilibrium constant                                      |
| $CoASH_T$                 | 1.0   | mM                  | Sum of mitochondrial CoA species                              |
| $FAD_T$                   | 0.7   | mM                  | Total concentration of flavin in ETF                          |

$V_{mtp}$  was adjusted following the same criteria indicated in Supplementary Material Table 9. Other parameters were taken from (van Eunen et al., 2013).



In addition to the conservation relation for  $\text{NAD}^+/\text{NADH}$ ,  $\text{NADP}^+/\text{NADPH}$  and antioxidant intermediates glutathione and thioredoxin (see below),  $\beta$ -oxidation introduces two conservation relations for species carrying a Coenzyme A group and  $\text{FAD}/\text{FADH}_2$ , indicated as follows:

$$\begin{aligned} \text{CoASH} = & \text{CoASH}_T - \text{AcCoA} - \text{SCoA} - \text{C16CoA} - \text{C16enoCoA} - \text{C16OHCoA} - \text{C16ketoCoA} \cdots \\ & - \text{C14CoA} - \text{C14enoCoA} - \text{C14OHCoA} - \text{C14ketoCoA} - \text{C12CoA} - \text{C12enoCoA} \cdots \\ & - \text{C12OHCoA} - \text{C12ketoCoA} - \text{C10CoA} - \text{C10enoCoA} - \text{C10OHCoA} - \text{C10ketoCoA} \cdots \\ & - \text{C8CoA} - \text{C8enoCoA} - \text{C8OHCoA} - \text{C8ketoCoA} - \text{C6CoA} - \text{C6enoCoA} - \text{C6OHCoA} \cdots \\ & - \text{C6ketoCoA} - \text{C4CoA} - \text{C4enoCoA} - \text{C4OHCoA} - \text{C4ketoCoA} \end{aligned} \quad (\text{S187})$$

$$\text{FAD} = \text{FAD}_T - \text{FADH}_2 \quad (\text{S188})$$

### 1.2.22 Redox balance, ROS transport and scavenging

$$V_{\text{IMAC}} = \left( a + \frac{b}{1 + \frac{K_{cc}}{[\text{O}_2^{\bullet -}]_i}} \right) \left( \text{GL} + \frac{G_{\text{max}}}{1 + e^{(K(\Delta\Psi_m^b) + \Delta\Psi_m)}} \right) \Delta\Psi_m \quad (\text{S189})$$

$$V_{\text{ROS}}^{\text{Tr}} = j \frac{V_{\text{IMAC}}}{\Delta\Psi_m} \left( -\Delta\Psi_m - \frac{RT}{F} \log \left( \frac{[\text{O}_2^{\bullet -}]_m}{[\text{O}_2^{\bullet -}]_i} \right) \right) \quad (\text{S190})$$

### 1.2.23 Supplementary Table S14. Parameters used in ROS transport

| Symbol           | Value                   | Units            | Description                                                 | Reference               |
|------------------|-------------------------|------------------|-------------------------------------------------------------|-------------------------|
| $a$              | $1 \times 10^{-3}$      |                  | Basal IMAC conductance                                      | (Cortassa et al., 2004) |
| $b$              | $1 \times 10^4$         |                  | Activation factor by cytoplasmic $\text{O}_2^{\bullet -}$   | (Cortassa et al., 2004) |
| $K_{cc}$         | $1 \times 10^{-2}$      | mM               | Activation constant by cytoplasmic $\text{O}_2^{\bullet -}$ | (Cortassa et al., 2004) |
| GL               | $3.5 \times 10^{-8}$    |                  | IMAC integral conductance                                   | (Cortassa et al., 2004) |
| $G_{\text{max}}$ | $3.9085 \times 10^{-6}$ |                  | IMAC leak conductance at saturation                         | (Cortassa et al., 2004) |
| K                | $7.0 \times 10^{-2}$    | $\text{mV}^{-1}$ | Steepness factor                                            | (Cortassa et al., 2004) |
| $\Delta\Psi_m^b$ | 4                       | mV               | Potential at half saturation                                | (Cortassa et al., 2004) |
| $j$              | 0.1                     |                  | Fraction of IMAC conductance                                | (Cortassa et al., 2004) |
| $\frac{RT}{F}$   | 26.730818               | mV               |                                                             |                         |

$$V_{\text{MnSOD}} = \frac{2 k_{\text{SOD}}^1 k_{\text{SOD}}^5 \left( k_{\text{SOD}}^1 + k_{\text{SOD}}^3 \left( 1 + \frac{[\text{H}_2\text{O}_2]_m}{K_i^{\text{H}_2\text{O}_2}} \right) \right) E_{\text{MnSOD}}^T [\text{O}_2^{\bullet-}]_m}{k_{\text{SOD}}^5 \left( 2 k_{\text{SOD}}^1 + k_{\text{SOD}}^3 \left( 1 + \frac{[\text{H}_2\text{O}_2]_m}{K_i^{\text{H}_2\text{O}_2}} \right) \right) + [\text{O}_2^{\bullet-}]_m k_{\text{SOD}}^1 k_{\text{SOD}}^3 \left( 1 + \frac{[\text{H}_2\text{O}_2]_m}{K_i^{\text{H}_2\text{O}_2}} \right)} \quad (\text{S191})$$

$$V_{\text{CuZnSOD}} = \frac{2 k_{\text{SOD}}^1 k_{\text{SOD}}^5 \left( k_{\text{SOD}}^1 + k_{\text{SOD}}^3 \left( 1 + \frac{[\text{H}_2\text{O}_2]_i}{K_i^{\text{H}_2\text{O}_2}} \right) \right) E_{\text{CuZnSOD}}^T [\text{O}_2^{\bullet-}]_i}{k_{\text{SOD}}^5 \left( 2 k_{\text{SOD}}^1 + k_{\text{SOD}}^3 \left( 1 + \frac{[\text{H}_2\text{O}_2]_i}{K_i^{\text{H}_2\text{O}_2}} \right) \right) + [\text{O}_2^{\bullet-}]_i k_{\text{SOD}}^1 k_{\text{SOD}}^3 \left( 1 + \frac{[\text{H}_2\text{O}_2]_i}{K_i^{\text{H}_2\text{O}_2}} \right)} \quad (\text{S192})$$

$$V_{\text{diff}_{\text{H}_2\text{O}_2}} = C_{\text{diff}_{\text{H}_2\text{O}_2}} ([\text{H}_2\text{O}_2]_m - [\text{H}_2\text{O}_2]_i) \quad (\text{S193})$$

$$V_{\text{GPX}_m} = \frac{E_T^{\text{GPX}_m} [\text{H}_2\text{O}_2]_m [\text{GSH}]_m}{\Phi_1 [\text{GSH}]_m + \Phi_2 [\text{H}_2\text{O}_2]_m} \quad (\text{S194})$$

$$V_{\text{GPX}_i} = \frac{E_T^{\text{GPX}_i} [\text{H}_2\text{O}_2]_i [\text{GSH}]_i}{\Phi_1 [\text{GSH}]_i + \Phi_2 [\text{H}_2\text{O}_2]_i} \quad (\text{S195})$$

$$V_{\text{GR}_m} = \frac{k_{\text{GR}}^1 E_T^{\text{GR}_m}}{1 + \frac{K_M^{\text{GSSG}}}{[\text{GSSG}]_m} + \frac{K_M^{\text{NADPH}}}{[\text{NADPH}]_m} + \frac{K_M^{\text{GSSG}}}{[\text{GSSG}]_m} \frac{K_M^{\text{NADPH}}}{[\text{NADPH}]_m}} \quad (\text{S196})$$

$$V_{\text{GR}_i} = \frac{k_{\text{GR}}^1 E_T^{\text{GR}_i}}{1 + \frac{K_M^{\text{GSSG}}}{V_{\text{GSS}}} + \frac{K_M^{\text{NADPH}}}{[\text{NADPH}]_i} + \frac{K_M^{\text{GSSG}}}{[\text{GSSG}]_i} \frac{K_M^{\text{NADPH}}}{[\text{NADPH}]_i}} \quad (\text{S197})$$

$$V_{\text{GRX}_m} = \frac{k_{\text{grx}_m} K_{\text{eq}}^{\text{GRX}} ([\text{GSH}]_m)^2 \text{GrxT} [\text{PSSG}]_m}{([\text{GSSG}]_m + K_{\text{eq}}^{\text{GRX}} ([\text{GSH}]_m)^2) \left( \frac{K_{\text{eq}}^{\text{GRX}} ([\text{GSH}]_m)^2 \text{GrxT}}{[\text{GSSG}]_m + K_{\text{eq}}^{\text{GRX}} ([\text{GSH}]_m)^2} + K_m^{\text{Grx}} \right) ([\text{PSSG}]_m + K_m^{\text{PSSG}})} \quad (\text{S198})$$

$$V_{\text{GRX}_i} = \frac{k_{\text{grx}_i} K_{\text{eq}}^{\text{GRX}} ([\text{GSH}]_i)^2 \text{GrxT} [\text{PSSG}]_i}{(V_{\text{GSS}} + K_{\text{eq}}^{\text{GRX}} ([\text{GSH}]_i)^2) \left( \frac{K_{\text{eq}}^{\text{GRX}} ([\text{GSH}]_i)^2 \text{GrxT}}{[\text{GSSG}]_i + K_{\text{eq}}^{\text{GRX}} ([\text{GSH}]_i)^2} + K_m^{\text{Grx}} \right) ([\text{PSSG}]_i + K_m^{\text{PSSG}})} \quad (\text{S199})$$

$$V_{PSSG_m} = \frac{k_{PSH}^1 E_T^{PSH} (PSSGT - [PSSG]_m)}{\left(1 + \frac{K_M^{GSH}}{[GSH]_m}\right) \left(1 + \frac{[H_2O_2]_m}{K_{act}^{H_2O_2}}\right)} \quad (S200)$$

$$V_{PSSG_i} = \frac{k_{PSH}^1 E_T^{PSH} (PSSGT - [PSSG]_i)}{\left(1 + \frac{K_M^{GSH}}{[GSH]_i}\right) \left(1 + \frac{[H_2O_2]_i}{K_{act}^{H_2O_2}}\right)} \quad (S201)$$

$$G_T = G_T - [GSH]_m - [GSH]_i - 2[GSSG] - [PSSG]_m - [PSSG]_i - 2[GSSG]_i \quad (S202)$$

$$[GSSG]_i = 0.5 (G_T - [GSH]_m - [GSH]_i - 2[GSSG]_m - [PSSG]_m - [PSSG]_i) \quad (S203)$$

$$V_{GST} = c_{GST} \frac{([GSH]_i - [GSH]_m)}{[GSH]_i + k_{0.5}^{GST}} \quad (S204)$$

$$V_{TxPX_m} = \frac{E_T^{Prx3m} [H_2O_2]_m [TrxSH_2]_m}{\Phi_{1Prx} [TrxSH_2]_m + \Phi_{2Prx} [H_2O_2]_m} \quad (S205)$$

$$V_{TxPX_i} = \frac{E_T^{Prxi} [H_2O_2]_i [TrxSH_2]_i}{\Phi_{1Prx} [TrxSH_2]_i + \Phi_{2Prx} [H_2O_2]_i} \quad (S206)$$

$$V_{TrxR_m} = \frac{k_{TrxR}^1 E_T^{TrxR2m}}{1 + \frac{K_M^{TrxSS}}{[TrxSS]_m} + \frac{K_{Mtrx}^{NADPH}}{[NADPH]_m} + \frac{K_M^{TrxSS}}{[TrxSS]_m} \frac{K_{Mtrx}^{NADPH}}{[NADPH]_m}} \quad (S207)$$

$$V_{TrxR_i} = \frac{k_{TrxR}^1 E_T^{TrxRi}}{1 + \frac{K_M^{TrxSS}}{[TrxSS]_i} + \frac{K_{Mtrx}^{NADPH}}{[NADPH]_i} + \frac{K_M^{TrxSS}}{[TrxSS]_i} \frac{K_{Mtrx}^{NADPH}}{[NADPH]_i}} \quad (S208)$$

$$[TrxSS]_m = TrxT_m - [TrxSH_2]_m \quad (S209)$$

$$[TrxSS]_i = TrxT_i - [TrxSH_2]_i \quad (S210)$$

$$V_{CAT} = 2k_{CAT}^1 E_{CAT}^T [H_2O_2]_i e^{-f^i [H_2O_2]_i} \quad (S211)$$

### 1.2.24 Supplementary Table S15. Parameters corresponding to ROS production and scavenging

| Symbol                                   | Value                 | Units                          | Description                                                       |
|------------------------------------------|-----------------------|--------------------------------|-------------------------------------------------------------------|
| $k_{\text{SOD}}^1$                       | $1.2 \times 10^3$     | $\text{mM}^{-1}\text{ms}^{-1}$ | SOD second-order rate constant                                    |
| $k_{\text{SOD}}^3$                       | 24                    | $\text{mM}^{-1}\text{ms}^{-1}$ | SOD second-order rate constant                                    |
| $k_{\text{SOD}}^5$                       | $2.4 \times 10^{-4}$  | $\text{ms}^{-1}$               | SOD first-order rate constant                                     |
| $K_i^{\text{H}_2\text{O}_2}$             | 0.5                   | mM                             | Inhibition constant for $\text{H}_2\text{O}_2$                    |
| $E_{\text{MnSOD}}^T$                     | $3.0 \times 10^{-3}$  | mM                             | MnSOD matrix concentration                                        |
| $E_{\text{CuZnSOD}}^T$                   | $3.0 \times 10^{-3}$  | mM                             | Cu,ZnSOD concentration                                            |
| $c_{\text{diff}_{\text{H}_2\text{O}_2}}$ | $2 \times 10^{-4}$    | $\text{ms}^{-1}$               | Diffusion constant for $\text{H}_2\text{O}_2$                     |
| $\Phi_1$                                 | $5.0 \times 10^{-3}$  | mM ms                          | GPX activity constant                                             |
| $\Phi_2$                                 | 0.75                  | mM ms                          | GPX activity constant                                             |
| $E_T^{\text{GPXm}}$                      | $1.0 \times 10^{-4}$  | mM                             | GPX matrix concentration                                          |
| $E_T^{\text{GPXi}}$                      | $5.0 \times 10^{-5}$  | mM                             | GPX extra-matrix concentration                                    |
| $k_{\text{GR}}^1$                        | $2.5 \times 10^{-3}$  | $\text{ms}^{-1}$               | Catalytic constant of glutathione reductase (GR)                  |
| $E_T^{\text{GRm}}$                       | $9.0 \times 10^{-4}$  | mM                             | GR matrix concentration                                           |
| $E_T^{\text{GRi}}$                       | $9.0 \times 10^{-4}$  | mM                             | GR extra-matrix concentration                                     |
| $K_M^{\text{NADPH}}$                     | 0.015                 | mM                             | GR Michaelis constant for NADPH                                   |
| $K_M^{\text{GSSG}}$                      | 0.06                  | mM                             | GR Michaelis constant for GSSG                                    |
| $[\text{NADPH}]_i$                       | $7.5 \times 10^{-2}$  | mM                             | Extra-matrix NADPH concentration                                  |
| $G_T$                                    | 6                     | mM                             | Total pool of glutathione                                         |
| $k_{\text{grx}_m}$                       | $3.6 \times 10^{-4}$  | $\text{mM s}^{-1}$             | Rate constant of mitochondrial matrix glutaredoxin (GRX) reaction |
| $k_{\text{grx}_i}$                       | $3.6 \times 10^{-4}$  | $\text{mM s}^{-1}$             | GRX extra-matrix rate constant                                    |
| $K_{\text{eq}}^{\text{GRX}}$             | $1.37 \times 10^{-3}$ | $\text{mM}^{-1}$               | GRX equilibrium constant                                          |
| $K_m^{\text{Grx}}$                       | 0.01                  | mM                             | GRX Michaelis constant for GSH                                    |

| Symbol             | Value                 | Units                             | Description                                                                        |
|--------------------|-----------------------|-----------------------------------|------------------------------------------------------------------------------------|
| $K_m^{PSSG}$       | 0.0005                | mM                                | Michaelis constant for glutathionylated proteins                                   |
| $k_{PSH}^1$        | 0.64                  | ms <sup>-1</sup>                  | Rate constant of protein glutathionylation                                         |
| $E_T^{PSH}$        | 8×10 <sup>-4</sup>    | mM                                | Concentration of proteins that can become glutathionylated                         |
| $K_M^{GSH}$        | 0.75                  | mM                                | Michaelis constant of GSH for glutathionylation                                    |
| $K_{act}^{H2O2}$   | 1×10 <sup>-3</sup>    | mM                                | Activation constant of H <sub>2</sub> O <sub>2</sub> for protein glutathionylation |
| $GrxT$             | 0.002                 | mM                                | Glutaredoxin concentration                                                         |
| $c_{GST}$          | 1.5×10 <sup>-8</sup>  | ms <sup>-1</sup>                  | Rate constant of glutathione transporter                                           |
| $k_{0.5}^{GST}$    | 2.6                   | mM                                | Transport association constant of GSH                                              |
| $E_T^{Prx3m}$      | 3.0×10 <sup>-3</sup>  | mM                                | Mitochondrial matrix concentration of Trx peroxidase (Prx)                         |
| $E_T^{Prx3i}$      | 0.1                   | mM                                | Prx extra-matrix concentration                                                     |
| $\Phi_{1Prx}$      | 3.83                  | mM ms                             | Constant for TxPX activity                                                         |
| $\Phi_{2Prx}$      | 1.85                  | mM ms                             | Constant for TxPX activity                                                         |
| $E_T^{TrxR2m}$     | 3.5×10 <sup>-4</sup>  | mM                                | Mitochondrial matrix concentration of thioredoxin reductase2 (TrxR2)               |
| $E_T^{TrxRi}$      | 3.5×10 <sup>-4</sup>  | mM                                | TrxR extra-matrix concentration                                                    |
| $K_M^{TrxSS}$      | 0.035                 | mM                                | TrxR Michaelis constant for oxidized Trx [Trx(SS)]                                 |
| $K_{Mtrx}^{NADPH}$ | 0.012                 | mM                                | Trx Michaelis constant for NADPH                                                   |
| $k_{TrxR}^1$       | 22.7×10 <sup>-3</sup> | ms <sup>-1</sup>                  | TrxR rate constant                                                                 |
| $TrxT_m$           | 0.025                 | mM                                | Total pool of mitochondrial matrix thioredoxin                                     |
| $TrxT_i$           | 0.05                  | mM                                | Total pool of extra-matrix thioredoxin                                             |
| $k_{CAT}^1$        | 17                    | mM <sup>-1</sup> ms <sup>-1</sup> | Rate constant of catalase (CAT)                                                    |
| $E_{CAT}^T$        | 1.0×10 <sup>-6</sup>  | mM                                | CAT extra-matrix concentration                                                     |
| $fr$               | 5.0×10 <sup>-2</sup>  | mM <sup>-1</sup>                  | CAT hydrogen peroxide inhibition factor                                            |

All parameters were taken from (Kembro et al., 2013b).

### 1.2.25 Mitochondrial NADPH reduction

$$NADP_m = C_{NADP_m} - [NADPH]_m \quad (S212)$$

$$V_{IDP\_NADP} = \left( 1 + \frac{[H^+]_m}{k_{m\_IDP}^{H^+}} \right) \left( \begin{array}{l} 1 + \frac{[ISOC]}{k_{m\_IDP}^{ISOC}} + \frac{NADP_m}{k_{m\_IDP}^{NADP}} \left( 1 + \frac{k_{i\_IDP}^{NADP}}{NADP_m} \right) + \frac{[aKG]}{k_{m\_IDP}^{aKG}} + \frac{[NADPH]_m}{k_{m\_IDP}^{NADPH}} + \dots \\ \dots \frac{[ISOC]}{k_{m\_IDP}^{ISOC}} \frac{NADP_m}{k_{m\_IDP}^{NADP}} \left( 1 + \frac{k_{i\_IDP}^{NADP}}{NADP_m} \right) + \frac{[aKG]}{k_{m\_IDP}^{aKG}} \frac{[NADPH]_m}{k_{m\_IDP}^{NADPH}} + \dots \\ \dots \frac{[ISOC]}{k_{m\_IDP}^{ISOC}} \frac{[NADPH]_m}{k_{m\_IDP}^{NADPH}} + \frac{[aKG]}{k_{m\_IDP}^{aKG}} \frac{NADP_m}{k_{m\_IDP}^{NADP}} \left( 1 + \frac{k_{i\_IDP}^{NADP}}{NADP_m} \right) \end{array} \right) \quad (S213)$$

$$V_{IDH\_NADP} = \frac{V_f^{IDH} \frac{k_{m\_IDP}^{ISOC}}{k_{m\_IDP}^{ISOC}} \frac{NADP_m}{k_{m\_IDP}^{NADP}} \left( 1 + \frac{k_{i\_IDP}^{NADP}}{VNADH_m} \right) - V_b^{IDH} \frac{[aKG]}{k_{m\_IDP}^{aKG}} \frac{[NADPH]_m}{k_{m\_IDP}^{NADPH}}}{V_{IDP\_NADP}} \quad (S214)$$

$$V_{THDen} = 1 + \frac{[NADH]_m}{k_{m\_THD}^{NADHm}} + \frac{NAD}{k_{m\_THD}^{NAD}} + \frac{NADP_m}{k_{m\_THD}^{NADP}} + \frac{[NADPH]_m}{k_{m\_THD}^{NADPH}} + \frac{[NADH]_m}{k_{m\_THD}^{NADHm}} \frac{NADP_m}{k_{m\_THD}^{NADP}} e^{(F/10RT) \cdot \Delta\mu_H} + \frac{[NADPH]_m}{k_{m\_THD}^{NADPH}} \frac{[NADH]_m}{k_{m\_THD}^{NADHm}} e^{(1-(F/10RT) \cdot \Delta\mu_H)} + \frac{NAD}{k_{m\_THD}^{NAD}} \frac{NADP_m}{k_{m\_THD}^{NADP}} e^{(F/10RT) \cdot \Delta\mu_H} e^{(1-(F/10RT) \cdot \Delta\mu_H)} + \frac{[NADH]_m}{k_{m\_THD}^{NADHm}} \frac{[NADPH]_m}{k_{m\_THD}^{NADPH}} \quad (S215)$$

$$V_{THD} = \frac{E_T^{THD} \cdot k_a^{THD} \frac{[NADH]_m}{k_{m\_THD}^{NADHm}} \frac{NADP_m}{k_{m\_THD}^{NADP}} e^{(F/10RT) \cdot \Delta\mu_H} - E_T^{THD} \cdot k_b^{THD} \frac{NAD}{k_{m\_THD}^{NAD}} \frac{[NADPH]_m}{k_{m\_THD}^{NADPH}} e^{(1-(F/10RT) \cdot \Delta\mu_H)}}{V_{THDen}} \quad (S216)$$

### 1.2.26 Supplementary Table S16. Parameters used in mitochondrial NADPH handling

| Symbol               | Value                | Units | Description                                                                  |
|----------------------|----------------------|-------|------------------------------------------------------------------------------|
| $C_{NADP_m}$         | 0.1                  | mM    | Sum of NADPH plus NADP <sup>+</sup>                                          |
| $k_{m\_IDP}^{H^+}$   | 0.5                  | mM    | Dissociation constant for H <sup>+</sup> of isocitrate dehydrogenase2 (IDH2) |
| $k_{m\_IDP}^{ISOC}$  | $3.9 \times 10^{-3}$ | mM    | IDH2 Michaelis constant for ISOC                                             |
| $k_{m\_IDP}^{NADP}$  | $6.7 \times 10^{-3}$ | mM    | IDH2 Michaelis constant for NADP                                             |
| $k_{i\_IDP}^{NADP}$  | $2 \times 10^{-6}$   | mM    | IDH2 inhibition constant for NADP                                            |
| $k_{m\_IDP}^{NADPH}$ | $1.2 \times 10^{-2}$ | mM    | IDH2 Michaelis constant for NADPH                                            |

| Symbol              | Value                  | Units               | Description                                            |
|---------------------|------------------------|---------------------|--------------------------------------------------------|
| $k_m^{aKG}_{IDP}$   | 0.51                   | mM                  | IDH2 Michaelis constant for $\alpha$ KG                |
| $V_f^{IDH}$         | $8.7 \times 10^{-5}$   | mM ms <sup>-1</sup> | Maximal rate of IDH2 in the forward direction          |
| $V_{fb}^{IDH}$      | $5.45 \times 10^{-6}$  | mM ms <sup>-1</sup> | Maximal rate of IDH2 in the reverse direction          |
| $k_m^{NADPH}_{THD}$ | 0.02                   | mM                  | Michaelis constant for NADPH in transhydrogenase (THD) |
| $k_m^{NADHm}_{THD}$ | 0.01                   | mM                  | THD Michaelis constant for NADH                        |
| $k_m^{NAD}_{THD}$   | 0.125                  | mM                  | THD Michaelis constant for NAD                         |
| $k_m^{NADP}_{THD}$  | 0.017                  | mM                  | THD Michaelis constant for NADP                        |
| $E_T^{THD}$         | $1.187 \times 10^{-5}$ | mM                  | THD enzyme concentration                               |
| $k_a^{THD}$         | 1.17474                | ms <sup>-1</sup>    | THD forward catalytic constant                         |
| $k_b^{THD}$         | 10                     | ms <sup>-1</sup>    | THD reverse catalytic constant                         |

All parameters were taken from (Kembro et al., 2013b)

## 2 Control analysis of the catabolic network model

### 2.1 Theoretical approach

Metabolic control analysis (MCA) is a quantitative methodology devoted to answer an important question that arises when one deals with networks of biochemical reactions of arbitrary complexity: what steps control the flux through a metabolic network? how is the concentration of the intermediaries controlled? It has been mainly applied to systems functioning at steady state (Fell, 1996).

The control coefficients describe how a variable or property of the system, typically a metabolic flux or the concentration of a metabolite, will respond to variation of a parameter, typically enzyme concentration or its kinetic properties, e.g.  $k_{cat}$ .

In a steady state, the flux control coefficient  $C_{Ek}^{J_i}$  is the fractional change in flux for a fractional change in the activity of enzyme,  $E_k$  (Kacser and Burns, 1973; Heinrich and Rapoport, 1974):

$$C_{Ek}^{J_i} = \frac{E_k}{J_i} \frac{\partial J_i}{\partial E_k} \quad (\text{S217})$$

Similarly, a metabolite,  $M_i$ , concentration control coefficient,  $C_{Ek}^{M_i}$ , can be defined:

$$C_{Ek}^{Mi} = \frac{E_k}{M_i} \frac{\partial M_i}{\partial E_k} \quad (\text{S218})$$

The link between the properties of an enzyme and its potential for flux control is given by the elasticity coefficient,  $\varepsilon$ . The elasticity coefficient  $\varepsilon_{ij}$  for the effect of intermediate metabolite S on the velocity  $v_i$  of enzyme  $E_i$  is the fractional change in rate of the isolated enzyme for a fractional change,  $\delta S$ , in the amount,  $[S]$  of substrate S:

$$\varepsilon_S^{vi} = \frac{S}{v_i} \frac{\partial v_i}{\partial S} \quad (\text{S219})$$

*Summation and connectivity theorems.* Several theorems constitute the main body of MCA. The summation theorem states that the sum of all flux control coefficients with respect to the activities of each of the enzymatic steps involved in the metabolic pathway being considered, is equal to unity (Kacser and Burns, 1973).

$$\sum_k C_{Ek}^{Ji} = 1 \quad (\text{S220})$$

This theorem is linked to the concept that the enzymes of the pathway can share the control of the flux. In fact, an important contribution of MCA is to demonstrate that the control of a metabolic pathway can be shared by multiple enzymes, implying that the traditional concept of a single rate-limiting enzyme (a "bottleneck") is inaccurate. This result also illustrates the fact that many rounds of mutation are needed to increase substantially the flux through a pathway (Kacser and Burns, 1981). Moreover, the summation theorem of MCA highlights the fact that the flux control coefficient of an enzyme is not an intrinsic property of that enzyme, but a system property (Fell, 1996). Otherwise, increasing the activity of a rate-controlling enzyme also changes its flux control coefficient and so must be the coefficients of enzymes whose activities have not been changed. The latter accounts for the fact that the summation total for the flux control coefficients remains at 1 at all levels of the enzyme whose activity is being increased.

The connectivity theorems relate the elasticities to the control coefficients. For the flux control coefficients, the theorem reads:

$$\sum_i C_{vi}^i \varepsilon_k^i = 0 \quad (\text{S221})$$

This theorem states that the sum over all products of the flux control coefficients (eqn. S217), with respect to the activity of the enzyme catalyzing step  $i$ , times the elasticity coefficient of this same enzyme (eqn. S219), is equal to zero. The connectivity theorem is regarded as the most meaningful of the MCA theorems, for it provides the route to understanding how the kinetics of the enzymes (represented by the elasticities) affect the values of the flux control coefficients (Fell, 1992).



A corresponding set of theorems exist for the concentration control coefficients. The summation theorem states that the sum of all metabolite control coefficients with respect to the activities of each of the enzymatic steps is equal to zero (Kacser and Burns, 1973).

$$\sum_i C_{X_i}^M = 0 \quad (\text{S222})$$

Where M represents any one of the variable metabolites of the pathway, and  $X_i$  stands for the activity of enzyme  $i$ .

The connectivity theorem becomes slightly more complex, in that it has one form when the metabolite, the concentration of which is the subject of the control coefficient (A), is different from the one on the elasticities (B) (Fell, 1992):

$$\sum_{i=1}^n C_{X_i}^A \mathcal{E}_B^i = 0 \quad , \quad (\text{S223})$$

but the following form when they are the same:

$$\sum_{i=1}^n C_{X_i}^A \mathcal{E}_A^i = -1 \quad (\text{S224})$$

### 2.1.1 Implementation of control analysis of our catabolic network model

Control analysis was performed by applying the method developed by Reder (Reder, 1988) as described in (Cortassa et al., 2009a; Cortassa et al., 2012). In the framework of MCA, Reder developed a generalized linear algebra method that provides a way of analyzing the sensitivity of metabolic systems to perturbations triggered by either a change in the internal state of the system or by the environment. Here, we applied it to a system in which metabolism, ion transport, and mechanical function are coupled. Because the model was constructed in a modular way, the method can be applied with a higher or lower degree of detail or refinement. In this way, and depending on the question to be examined, the extent of control exerted by a module can be applied by zooming in and out.

The departure point of the analysis is the *stoichiometric matrix*, obtained from the set of differential equations of the model. The stoichiometric matrix defines the structural relationships between the processes, and the intermediates participating in the metabolic network under consideration. The information contained in the stoichiometric matrix is independent of both the enzyme kinetics and the parameters that rule the dynamic behavior of the metabolic system.

The second piece of information required to perform control analysis is the *elasticity matrix* defined by the dependence of each process in the metabolic network on the intermediates (e.g., ions or metabolites) included in the model. The elasticity matrix is quantified through the derivatives of the rates of individual processes with respect to each possible effector. Each elasticity coefficient reflects the local property of a process, for example, an enzyme activity with respect to its substrate, which is

linked to the global behavior of the system through the steady state levels of metabolites (substrates or effectors) that intervene in the network dynamics.

By applying matrix algebra, the matrices corresponding to control and response coefficients are obtained. Both kinds of matrix quantify the relationships of control and regulation, respectively, in the network of reactions. The regulation exerted by internal or external effectors to a network can be quantified by the response coefficient (Ainscow and Brand, 1999).

The following matrices' relationships were used in the computation of the flux and metabolite concentration control coefficients:

$$C = \text{Id}_r - D_x v L (N_r D_x v L)^{-1} N_r \quad (\text{S225})$$

$$\Gamma = -L (N_r D_x v L)^{-1} N_r \quad (\text{S226})$$

with  $C$  and  $\Gamma$  referring to the flux- and metabolite concentration control coefficients, respectively;  $\text{Id}_r$ , the identity matrix of dimension  $r$ , the number of processes in the network under study;  $D_x v$  the elasticity matrix;  $N_r$  the reduced stoichiometric matrix and  $L$ , the link matrix that relates the reduced- to the full stoichiometric matrix of the system. For a more detailed description see (Cortassa et al., 2009a).

The advantages of the matrix method (Reder, 1988) over similar tools developed by other authors (Sauro et al., 1987; Westerhoff and Kell, 1987), is that *(i)* it can be applied to networks of any complexity including conserved cycles or multiple branches, and hierarchical relationships (Kahn and Westerhoff, 1991), and *(ii)* it is not based on the compliance of the theorems of metabolic control analysis and the particular conditions under which the analysis is carried out.

### 2.1.2 Supplementary Table S17 Comparison of PFK flux control coefficients (FCC) on representative fluxes throughout the catabolic network

| Reaction | Finite Difference PFK FCC <sup>a</sup> | Matrix PFK FCC |
|----------|----------------------------------------|----------------|
| GLUT4    | 0.107                                  | 0.1054         |
| HK       | 0.107                                  | 0.1054         |
| PFK      | 0.1151                                 | 0.1134         |
| ALD      | 0.1149                                 | 0.1135         |
| GAPD     | 0.1148                                 | 0.1131         |
| PGK      | 0.1148                                 | 0.1131         |
| ENOL     | 0.1148                                 | 0.1131         |
| PK       | 0.1148                                 | 0.1131         |
| LDH      | 0.1148                                 | 0.1134         |
| G6PDH    | -0.6111                                | -0.5988        |
| P6GDH    | -0.6111                                | -0.5988        |

## Supplementary Material

| Reaction | Finite Difference<br>PFK FCC <sup>a</sup> | Matrix PFK<br>FCC |
|----------|-------------------------------------------|-------------------|
| R5PI     | -0.4096                                   | -0.3996           |
| Ru5PE    | -0.6761                                   | -0.6631           |
| RTAc     | -0.4096                                   | -0.3996           |
| RTAc2    | -0.4096                                   | -0.3996           |
| RTAl     | -0.4096                                   | -0.3996           |
| ALDR1    | -1.8862                                   | -1.8587           |
| SoDH     | -1.8862                                   | -1.8587           |
| XyDH     | -1.1626                                   | -1.1442           |
| FRUT     | -1.8862                                   | -1.8587           |
| XyOHT    | -1.1626                                   | -1.1442           |
| HydroATP | 0.1144                                    | 0.1131            |
| NDPcs    | 0.3878                                    | 0.2893            |
| NTPcs    | -0.6102                                   | -0.598            |
| GNO_is   | 0.3741                                    | 0.3697            |
| GPa      | 0.1495                                    | 0.1477            |
| GPb      | 9.5359                                    | 9.4245            |
| PGLM     | 0.3741                                    | 0.3697            |
| PyrC     | 0.1137                                    | 0.1437            |
| PyrDH    | 0.1965                                    | 0.0675            |
| CI_Resp  | 0.0676                                    | 0.041             |
| ETFH     | -0.1191                                   | -0.1418           |
| leak     | 0.0044                                    | 4.67E-04          |
| MnSOD    | 0.0378                                    | 0.0236            |
| GPXm     | 0.0377                                    | 0.0236            |
| GRm      | 0.1783                                    | 0.0697            |
| GPX      | 0.0318                                    | 0.0192            |
| TxPXm    | 0.0378                                    | 0.0236            |
| TxPX     | 0.0318                                    | 0.0192            |
| TxRm     | 0.0378                                    | 0.0236            |
| TxR      | 0.0318                                    | 0.0192            |
| H2O2em   | 0.0378                                    | 0.0236            |
| Cat      | 0.0318                                    | 0.0192            |
| Cpt1C16  | -0.1191                                   | -0.0538           |
| CactC16  | -0.1191                                   | -0.0538           |
| Cpt2C16  | -0.1191                                   | -0.0538           |
| lcadC16  | -0.121                                    | -0.0637           |

| Reaction | Finite Difference<br>PFK FCC <sup>a</sup> | Matrix PFK<br>FCC |
|----------|-------------------------------------------|-------------------|
| lcadC14  | -0.1249                                   | -0.0839           |
| lcadC12  | -0.1606                                   | -0.1306           |
| lcadC10  | -0.1611                                   | -0.1311           |
| lcadC8   | -0.1612                                   | -0.1314           |
| crotC6   | -0.1191                                   | -0.0538           |
| crotC4   | -0.1191                                   | -0.0538           |

<sup>a</sup> Flux control coefficients were calculated from the finite differences in fluxes and activities after manually changing the Vmax of the PFK  $\pm 2.5$  and  $\pm 5\%$  of its original value (Table S1) and compared with the value obtained by the matrix method applied throughout this work.

## References

- Ainscow, E.K., and Brand, M.D. (1999). Internal regulation of ATP turnover, glycolysis and oxidative phosphorylation in rat hepatocytes. *Eur J Biochem* 266(3), 737-749.
- Bisaccia, F., De Palma, A., Prezioso, G., and Palmieri, F. (1990). Kinetic characterization of the reconstituted tricarboxylate carrier from rat liver mitochondria. *Biochim Biophys Acta* 1019(3), 250-256.
- Cortassa, S., Aon, M.A., Iglesias, A.A., Aon, J.C., and Lloyd, D. (2012). *An Introduction to Metabolic and Cellular Engineering*. Singapore: World Scientific Publishers.
- Cortassa, S., Aon, M.A., Marban, E., Winslow, R.L., and O'Rourke, B. (2003). An integrated model of cardiac mitochondrial energy metabolism and calcium dynamics. *Biophys J* 84(4), 2734-2755. doi: 10.1016/S0006-3495(03)75079-6.
- Cortassa, S., Aon, M.A., O'Rourke, B., Jacques, R., Tseng, H.J., Marban, E., et al. (2006). A computational model integrating electrophysiology, contraction, and mitochondrial bioenergetics in the ventricular myocyte. *Biophys J* 91(4), 1564-1589. doi: 10.1529/biophysj.105.076174.
- Cortassa, S., Aon, M.A., Winslow, R.L., and O'Rourke, B. (2004). A mitochondrial oscillator dependent on reactive oxygen species. *Biophys J* 87(3), 2060-2073. doi: 10.1529/biophysj.104.041749.
- Cortassa, S., Caceres, V., Bell, L.N., O'Rourke, B., Paolucci, N., and Aon, M.A. (2015). From metabolomics to fluxomics: a computational procedure to translate metabolite profiles into metabolic fluxes. *Biophys J* 108(1), 163-172. doi: S0006-3495(14)03069-0 [pii] 10.1016/j.bpj.2014.11.1857.
- Cortassa, S., O'Rourke, B., Winslow, R.L., and Aon, M.A. (2009a). Control and regulation of mitochondrial energetics in an integrated model of cardiomyocyte function. *Biophys J* 96(6), 2466-2478.
- Cortassa, S., Sollott, S.J., and Aon, M.A. (2017a). Mitochondrial respiration and ROS emission during beta-oxidation in the heart: An experimental-computational study. *PLoS Comput Biol* 13(6), e1005588. doi: 10.1371/journal.pcbi.1005588.

## Supplementary Material

- Cortassa, S., Sollott, S.J., and Aon, M.A. (2017b). "Substrate selection and its impact on mitochondrial respiration and redox," in *Molecular Basis for Mitochondrial Signaling*, ed. T.K. Rostovtseva. Springer International Publishing AG).
- Fell, D.A. (1992). Metabolic control analysis: a survey of its theoretical and experimental development. *Biochem J* 286 ( Pt 2), 313-330.
- Fell, D.A. (1996). *Understanding the Control of Metabolism*. London: Portland Press.
- Halestrap, A.P. (1978). Pyruvate and ketone-body transport across the mitochondrial membrane. Exchange properties, pH-dependence and mechanism of the carrier. *Biochem J* 172(3), 377-387.
- Heinrich, R., and Rapoport, T.A. (1974). A linear steady-state treatment of enzymatic chains. General properties, control and effector strength. *Eur J Biochem* 42(1), 89-95.
- Kacser, H., and Burns, J.A. (1973). The control of flux. *Symp Soc Exp Biol* 27, 65-104.
- Kacser, H., and Burns, J.A. (1981). The molecular basis of dominance. *Genetics* 97(3-4), 639-666.
- Kahn, D., and Westerhoff, H.V. (1991). Control theory of regulatory cascades. *J Theor Biol* 153(2), 255-285.
- Karacaoglan, V., and Ozer, I. (2005). Steady-state kinetic properties of sorbitol dehydrogenase from chicken liver. *Comp Biochem Physiol B Biochem Mol Biol* 140(2), 309-312. doi: S1096-4959(04)00358-6 [pii] 10.1016/j.cbpc.2004.10.017.
- Kembro, J.M., Aon, M.A., Winslow, R.L., O'Rourke, B., and Cortassa, S. (2013a). Integrating mitochondrial energetics, redox and ROS metabolic networks: A two-compartment model. *Biophysical Journal* 104, 332-343.
- Kembro, J.M., Aon, M.A., Winslow, R.L., O'Rourke, B., and Cortassa, S. (2013b). Integrating mitochondrial energetics, redox and ROS metabolic networks: a two-compartment model. *Biophys J* 104(2), 332-343. doi: S0006-3495(12)05055-2 [pii] 10.1016/j.bpj.2012.11.3808.
- Kubiseski, T.J., Hyndman, D.J., Morjana, N.A., and Flynn, T.G. (1992). Studies on pig muscle aldose reductase. Kinetic mechanism and evidence for a slow conformational change upon coenzyme binding. *J Biol Chem* 267(10), 6510-6517.
- Lambeth, M.J., and Kushmerick, M.J. (2002). A computational model for glycogenolysis in skeletal muscle. *Ann Biomed Eng* 30(6), 808-827.
- Lueck, J.D., and Fromm, H.J. (1974). Kinetics, mechanism, and regulation of rat skeletal muscle hexokinase. *J Biol Chem* 249(5), 1341-1347.
- Mazumder, P.K., O'Neill, B.T., Roberts, M.W., Buchanan, J., Yun, U.J., Cooksey, R.C., et al. (2004). Impaired cardiac efficiency and increased fatty acid oxidation in insulin-resistant ob/ob mouse hearts. *Diabetes* 53(9), 2366-2374. doi: 53/9/2366 [pii].
- McIntyre, L.M., Thorburn, D.R., Bubb, W.A., and Kuchel, P.W. (1989). Comparison of computer simulations of the F-type and L-type non-oxidative hexose monophosphate shunts with <sup>31</sup>P-NMR experimental data from human erythrocytes. *Eur J Biochem* 180(2), 399-420.
- Nishino, T., Yachie-Kinoshita, A., Hirayama, A., Soga, T., Suematsu, M., and Tomita, M. (2009). In silico modeling and metabolome analysis of long-stored erythrocytes to improve blood storage methods. *J Biotechnol* 144(3), 212-223. doi: S0168-1656(09)00355-1 [pii] 10.1016/j.jbiotec.2009.08.010.
- O'Brien, M.M., Schofield, P.J., and Edwards, M.R. (1983). Polyol-pathway enzymes of human brain. Partial purification and properties of sorbitol dehydrogenase. *Biochem J* 211(1), 81-90.
- Pettit, F.H., Pelley, J.W., and Reed, L.J. (1975). Regulation of pyruvate dehydrogenase kinase and phosphatase by acetyl-CoA/CoA and NADH/NAD ratios. *Biochem Biophys Res Commun* 65(2), 575-582. doi: S0006-291X(75)80185-9 [pii].

- Randle, P.J., and Tubbs, P.K. (1979). "Carbohydrate and fatty acid metabolism", in: *Handbook of Physiology*. (ed.) N.S. R.M. Berne, R. Geiger. American Physiology Society).
- Reder, C. (1988). Metabolic control theory: a structural approach. *J Theor Biol* 135(2), 175-201.
- Rowan, A.N., Newsholme, E.A., and Scrutton, M.C. (1978). Partial purification and some properties of pyruvate carboxylase from the flight muscle of the locust (*Schistocerca gregaria*). *Biochim Biophys Acta* 522(1), 270-275.
- Sauro, H.M., Small, J.R., and Fell, D.A. (1987). Metabolic control and its analysis. Extensions to the theory and matrix method. *Eur J Biochem* 165(1), 215-221.
- Schafer, F.Q., and Buettner, G.R. (2001). Redox environment of the cell as viewed through the redox state of the glutathione disulfide/glutathione couple. *Free Radic Biol Med* 30(11), 1191-1212.
- van Eunen, K., Simons, S.M., Gerding, A., Bleeker, A., den Besten, G., Touw, C.M., et al. (2013). Biochemical competition makes fatty-acid beta-oxidation vulnerable to substrate overload. *PLoS Comput Biol* 9(8), e1003186. doi: 10.1371/journal.pcbi.1003186 PCOMPBIOL-D-13-00495 [pii].
- Wei, A.C., Aon, M.A., O'Rourke, B., Winslow, R.L., and Cortassa, S. (2011). Mitochondrial energetics, pH regulation, and ion dynamics: a computational-experimental approach. *Biophys J* 100(12), 2894-2903. doi: S0006-3495(11)00597-2 [pii] 10.1016/j.bpj.2011.05.027.
- Westerhoff, H.V., and Kell, D.B. (1987). Matrix method for determining steps most rate-limiting to metabolic fluxes in biotechnological processes. *Biotechnol Bioeng* 30(1), 101-107. doi: 10.1002/bit.260300115.

**Matlab file for main function “WholeCatab\_v3.m”**

```
function dydt = WholeCatab_v3 (t,kmrgd) %  
%% State variables  
Cam=kmrgd(1);  
ADPm=kmrgd(2);  
Dpsim=kmrgd(3);  
NADHm=kmrgd(4);  
H_mito=kmrgd(5);  
Pim=kmrgd(6);  
ISOm=kmrgd(7);  
aKGm=kmrgd(8);  
SCoA=kmrgd(9);  
Succ=kmrgd(10);  
FUM=kmrgd(11);  
MALm=kmrgd(12);  
Oaa=kmrgd(13);  
C16Carn_cy=kmrgd(14);  
C16Carn_m=kmrgd(15);  
C16CoA_m=kmrgd(16);  
C16EnoylCoA_m=kmrgd(17);  
C16OHCoA_m=kmrgd(18);  
C16KetoCoA_m=kmrgd(19);  
C14CoA_m=kmrgd(20);  
C14EnoylCoA_m=kmrgd(21);  
C14OHCoA_m=kmrgd(22);  
C14KetoCoA_m=kmrgd(23);  
C12CoA_m=kmrgd(24);  
C12EnoylCoA_m=kmrgd(25);  
C12OHCoA_m=kmrgd(26);  
C12KetoCoA_m=kmrgd(27);  
C10CoA_m=kmrgd(28);  
C10EnoylCoA_m=kmrgd(29);  
C10OHCoA_m=kmrgd(30);  
C10KetoCoA_m=kmrgd(31);  
C8CoA_m=kmrgd(32);  
C8EnoylCoA_m=kmrgd(33);  
C8OHCoA_m=kmrgd(34);  
C8KetoCoA_m=kmrgd(35);  
C6CoA_m=kmrgd(36);  
C6EnoylCoA_m=kmrgd(37);  
C6OHCoA_m=kmrgd(38);  
C6KetoCoA_m=kmrgd(39);  
C4CoA_m=kmrgd(40);  
C4EnoylCoA_m=kmrgd(41);  
C4OHCoA_m=kmrgd(42);  
C4KetoCoA_m=kmrgd(43);
```

AcCoA\_m=kmrgd(44);  
 FADH\_m=kmrgd(45);  
 NADPHm=kmrgd(46);  
 SO2m=kmrgd(47);  
 SO2i=kmrgd(48);  
 H2O2m=kmrgd(49);  
 H2O2i=kmrgd(50);  
 GSHm=kmrgd(51);  
 GSHi=kmrgd(52);  
 GSSGm=kmrgd(53);  
 TrxSH2m=kmrgd(54);  
 TrxSH2=kmrgd(55);  
 GSSGi=kmrgd(56);  
 PSSGm=kmrgd(57);  
 PSSGi=kmrgd(58);  
 Glci=kmrgd(59);  
 G6P=kmrgd(60);  
 FbP=kmrgd(61);  
 G3P=kmrgd(62);  
 G13bP=kmrgd(63);  
 GP3=kmrgd(64);  
 PEP=kmrgd(65);  
 Pyr=kmrgd(66);  
 Sor=kmrgd(67);  
 FRU=kmrgd(68);  
 GP6=kmrgd(69);  
 Ru5P=kmrgd(70);  
 R5P=kmrgd(71);  
 X5P=kmrgd(72);  
 S7P=kmrgd(73);  
 E4P=kmrgd(74);  
 XyOH=kmrgd(75);  
 ATPc=kmrgd(76);  
 NADHc=kmrgd(77);  
 NADPHc=kmrgd(78);  
 Maltoside=kmrgd(79);  
 G1P=kmrgd(80);  
 Pyrm=kmrgd(81);  
 CITm=kmrgd(82);

%% Parameters

GLUT4\_kcat=2.0\*2.65E-5;  
 NDP=0.75; % total level of pyrimidine nucleotides in cytoplasm (NAD + NADH)  
 NTP=0.05; % total of pyrimidine phosphate dinucleotides (NADP+ NADPH)  
 CadTcy=8.9; % total of adenine nucleotides (ATP + ADP)  
 Glco=9.0;  
 AMP\_c=0.01; %0.1



GDP=0.1;  
 Pi\_cy=3.0;  
 % pH=7.4;  
 HKVmax=2.0\*0.0052;  
 HKKmGLC=1.1E-1;  
 HKKmAT=0.17;  
 HKKmG6P=0.0014;  
 HKKmAD=1.2;  
 HKKapp=7800;  
 PFKVmax=2.0\*3.5E-4;  
 PFKKmAT=0.08;  
 PFKKmpAT=0.25;  
 PFKKmF6P=0.18;  
 PFKKmpF6P=20;  
 PFKKmAD=2.7;  
 PFKKmpAD=2.7;  
 PFKKmFBP=4.02;  
 PFKKmpFBP=4.02;  
 PFKKeq=242;  
 PFKLo=13;  
 PFKKiATP=0.87;  
 PFKKaAMP=0.015;  
 PFKKiCit=0.03;  
 PFK\_d=0.01;  
 PFK\_e=0.01;  
 PFK\_f=0.01;  
 ALDVmax=2.0\*1.05E-3; %mM ms-1  
 ALDKmFBP=0.05;  
 ALDKmG3P=2.1;  
 ALDKeq=1.2E-1; %(mM-1)  
 GAPDVmax=2.0\*2.0E-3; %mM s-1  
 GAPDKmG13BP=0.0008;  
 GAPDKmG3P=0.0025;  
 GAPDKmNADH=0.00033;  
 GAPDKmNAD=0.009;  
 nGDH=0.64;  
 GAPDKmPi=0.29;  
 GAPDKeq=0.089; % adimensional  
 PGKVmax=2.0\*1.25E-3;  
 PGKKmGP3=1.2;  
 PGKKmG13BP=0.0022;  
 PGKKmATP=0.35;  
 PGKKmADP=0.0008;  
 PGKKeq=57109; %adimensional  
 ENOLVmax=2.0\*1.1E-3;  
 ENOLKmPEP=0.37;  
 ENOLKmGP3=0.12;

ENOLK<sub>eq</sub>=0.49; %adimensional  
PKV<sub>max</sub>=2.0\*0.208;  
PKK<sub>m</sub>PEP=0.08;  
PKK<sub>m</sub>AD=0.3;  
PKK<sub>m</sub>Pyr=7.05;  
PKK<sub>m</sub>AT=1.13;  
PKK<sub>m</sub>FBP=0.005;  
PKK<sub>m</sub>GDP=0.1;  
PKK<sub>eq</sub>=10304;  
LAC=4.0E-2;  
LDHV<sub>max</sub>=2.0\*2.7E-3;  
LDHK<sub>m</sub>Pyr=0.0335;  
LDHK<sub>m</sub>NADH=0.002;  
LDHK<sub>m</sub>LAC=17;  
LDHK<sub>m</sub>NAD=0.849;  
LDHK<sub>eq</sub>=16198; %adimensional  
V<sub>max</sub>amil=2.0\*1.9E-5;  
GLY=110;  
K<sub>m</sub>amil=5.0;  
K<sub>m</sub>Maltoside=1.0;  
V<sub>max</sub>GPa= 2.0\*1.0E-3;  
V<sub>max</sub>GPb= 2.0\*6.24e-4;  
K<sub>ai</sub>Glyf=2.0; % 2.0  
K<sub>a</sub>Glyf=1.7; % 1.7  
K<sub>api</sub>=4.0E-1;  
K<sub>a</sub>Glyb=0.15;  
K<sub>ai</sub>gp=10.1;  
K<sub>eq</sub>GP=0.42;  
K<sub>i</sub>api=4.7;  
K<sub>ib</sub>Glyf=15;  
K<sub>b</sub>pi=0.2;  
K<sub>ib</sub>Glyb=4.4;  
K<sub>big</sub>gp=7.4;  
K<sub>ib</sub>pi=4.6;  
K<sub>b</sub>gp=1.5;  
K<sub>p</sub>AMP=1.9E-6;  
nH=1.75;  
V<sub>max</sub>PGLM=2.0\*7.0e-5;  
K<sub>G</sub>1P=0.063;  
K<sub>G</sub>6P=0.03;  
K<sub>eq</sub>PGLM=16.62;  
G6PDHV<sub>max</sub>=2.0\*2.0E-6;  
G6PDHK<sub>m</sub>NADP=0.00367;  
G6PDHK<sub>m</sub>NADPH=0.00312;  
G6PDHK<sub>m</sub>G6P=0.0667;  
G6PDHK<sub>m</sub>ATP=0.749;  
P6GDHV<sub>max</sub>=2.0\*5.0E-6;

P6GDHk1=2.4E3;  
P6GDHk3=2.0E6;  
P6GDHk5=48;  
P6GDHk7=6.3E2;  
P6GDHk9=8.0E2;  
P6GDHk2=4.1E2;  
P6GDHk4=26;  
P6GDHk6=30;  
P6GDHk8=36;  
P6GDHk10=2.25E2;  
R5PIVmax=2.0\*1.8E-6;  
R5PIk1=6.09E1;  
R5PIk2=33.3;  
R5PIk3=14.2;  
R5PIk4=2.16E1;  
Ru5PEVmax=2.0\*1.7E-5;  
Ru5PEk1=3.91E3;  
Ru5PEk2=4.38E2;  
Ru5PEk3=3.05E2;  
Ru5PEk4=1.49E3;  
R5PIK<sub>m</sub>Ru5P=(R5PIk2+R5PIk3)/R5PIk1;  
R5PIK<sub>m</sub>R5P=(R5PIk2+R5PIk3)/R5PIk4;  
Ru5PEK<sub>m</sub>Ru5P=(Ru5PEk2+Ru5PEk3)/Ru5PEk1;  
Ru5PEK<sub>m</sub>Xu5P=(Ru5PEk2+Ru5PEk3)/Ru5PEk4;  
RTAcVmax=2.0\*1.35E-6;  
RTAck1=2.16E2;  
RTAck2=38.0;  
RTAck3=34.0;  
RTAck4=1.56E2;  
RTAck5=3.29E2;  
RTAck6=1.75E2;  
RTAck7=40;  
RTAck8=4.48E1;  
RTAc2Vmax=2.0\*2.5E-6;  
RTAc2k1=2.16E2;  
RTAc2k2=38; 3.8;  
RTAc2k3=34;  
RTAc2k4=1.56E2;  
RTAc2k5=3.29E2;  
RTAc2k6=1.75E2;  
RTAc2k7=40.0;  
RTAc2k8=4.48E1;  
RTAIVmax=2.0\*2.9E-5;  
RTAIk1=2.16E2;  
RTAIk2=4.53;  
RTAIk3=16.3;  
RTAIk4=3.0E1;

RTalk5=4.9E2;  
 RTalk6=60;  
 RTalk7=17;  
 RTalk8=7.9E1;  
 ALDREmax=2.0\*1.7E-8;  
 ALR1V2=0.037;  
 ALR1V1=0.33;  
 ALR1KA=6.9E-4;  
 ALR1KB=4.6E1;  
 ALR1KP=3.8E2;  
 ALR1KQ=1.5E-2;  
 ALR1KIa=4.1E-4;  
 ALR1KIb=9.2E-2;  
 ALR1KIp=1.3E3;  
 ALR1KIq=8.3E-3;  
 ALR1Keq=ALR1V1/ALR1V2\*ALR1KP\*ALR1KIq/ALR1KIa/ALR1KB;  
 DALR1=ALR1KIa\*ALR1KB\*ALR1V2;  
 DALR2=ALR1KB\*ALR1V2;  
 DALR3=ALR1KA\*ALR1V2;  
 DALR4=ALR1KQ\*ALR1V1/ALR1Keq;  
 DALR5=ALR1KP\*ALR1V1/ALR1Keq;  
 DALR6=ALR1V2;  
 DALR7=ALR1KQ\*ALR1V1/ALR1KIa/ALR1Keq;  
 DALR8=ALR1KA\*ALR1V2/ALR1KIq;  
 DALR9=ALR1V1/ALR1Keq;  
 DALR10=ALR1V2/ALR1KIp;  
 DALR11=ALR1V1/ALR1KIb/ALR1Keq;  
 SoDHVmax=2.0\*3.0E-7;  
 SoDHKmFRU=1.0E3;  
 SoDHKmNADH=1.0E-2;  
 SoDHKmSorb=9.6;  
 SoDHKmNAD=2.0;  
 SoDHKiNAD=2.0E0;  
 SoDHKiNADH=1.0E-2;  
 SoDHKeq=3.7E-6\*2.5E4;  
 XyDHVmax=2.0\*1.5E-4;  
 XyDHKmXy=2.0E1;  
 XyDHKmNADH=1.0E-2;  
 XyDHKmXyOH=8.08E-1;  
 XyDHKmNAD=2.0;  
 XyDHKiNADH=1.0E-2;  
 XyDHKiNAD=2.0;  
 XyDHKeq=0.24;  
 HydrolVmax=0.003;  
 HydroKmATP=9.0;  
 NADHDemVmax=2.0E-4;  
 NADHDemKmNADH=5.0E-2;

```

NADHDemKmNAD=0.7;
NADPHDemVmax=0.32;
NADPHDemKmNADPH=0.025;
NADPHDemKmNADP=0.0075;
ktfru=1.0e-6;
ktXyOH=5.0E-6;
kmXyOH=1.5E-5;
kmFru=3.0;
% Mitochondrial processes parameters
KeqAAT=6.6;
PyrCbVmax=0.5E-3; % (mM s-1)
PyrCbKmPyr=0.23; % (in mM)
PyrCbKmATP=0.25; % (in mM)
PyrCbK1=2.512E-5; % (mM)
PyrCbK2=1.259E-5; % (mM)
% Pyruvate dehydrogenase
PyrDHSVmax=0.0075; % mM ms-1
PyrDHKmCoA=0.006; % (in mM)
PyrDHKmNAD=0.05; % (in mM)
PyrDHKmPyr=0.1; % (in mM)
PyrDHXNAD= 0.04; % (in mM)
PyrDHXCoA= 0.03; % (in mM)
EC_PDPCa= 1.0E-3; % (mM)
f_PDPNAD_H=6.7; % (mM)
n_NAD=0.2;
n_Coa=0.6;
f_PDKAcCoA=5.3; % (in mM)
EC_PDKPyr= 0.1; % (in mM)
EC_PDKATP=0.2;
EC_PDKADP=0.05;
Hi_cy=1.0E-4;
NADt_mat=1.0;
NADm=NADt_mat-NADHm ;
% Pyruvate Carrier
PyC_Vmax=4.125E-4; % mM ms-1
PyC_KmPyr=0.15; % mM;
PyC_Kh1=7.5E-6;
Cic=0.01;
CiCKm_Cic=0.036;
CiCKm_MALc=0.17;
CiCVmax=0.01;
CiCKm_Cim=0.288;
CiCKm_Malm=0.057;
CiCKh1=2.E-4;
CicKh2=7.5E-6;
RhoF1=1.5;
ANTVm=3.15;

```

GLUm=1.0E-3;  
 ASPm=0.2;  
 MALc=0.2;  
 RhoREN=2.0E-1;  
 RhoSDH=1.7E-1;  
 gh=1.0E-7;  
 ketf=6.949E16; ;  
 RhoETF=0.15; ;  
 kresf=5.765E13;  
 KeqF1=1.71E6;  
 Cai=1.0E-4;  
 beta\_matr=1e-5; %Mitochondrial buffering capacity  
 Cadm=1.5; % total cyto adenon mitochondrial  
 Conc\_NHE=0.00785;  
 %TCA cycle enzyme activities  
 KcsicoA=0.056;  
 KcsacCoA=4.4E-3;  
 KcsiacCoA=4.4E-3;  
 KcsOaa=3.3E-3;  
 KCS=0.06;  
 kfACO=1.796E-2;  
 KeqACO=2.22;  
 kfidh=5.376;  
 kfKG=0.052;  
 KfSL=0.056;  
 kfFH=0.000415\*2;  
 kfMDH=0.01242;  
 kfAATm=0.00107\*2;  
 KSLeq=3.115;  
 IDHkh\_1=1E-5;  
 IDHkh\_2=9E-4;  
 IDHkh\_1a=4E-5;  
 IDHkh\_2a=7E-5;  
 MDHKm\_MALm=5.6E-2;  
 MDHKm\_NADm=0.056;  
 MDHKm\_Oaam=0.0348;  
 MDHKm\_NADHm=0.0145;  
 MDHki\_Oaam=0.018;  
 MDHki\_NADHm=0.2;  
 MDHki\_MALm=3.5E-2;  
 KeqMDH=1.0E-4;  

$$V1oV2m=(KeqMDH*MDHKm\_NADm*MDHki\_MALm/(MDHki\_Oaam*MDHKm\_NADHm)^(1/2));$$
 MDHki\_NAD=(V1oV2m)/KeqMDH\*MDHki\_NADHm\*MDHKm\_Oaam/MDHKm\_MALm;  
 MDHkhm1=1.131E-5;  
 MDHkhm2=2.67E1;  
 MDHkhm3=6.68E-9;

```

MDHkhm4=5.62E-6;
MDHkmoff=3.99E-2;
Mg=0.4;
KkgCa= 1.5E-4;
VmPiC=6.0E-1;
Cimat=1.812E-3;
Dpsio=0.0;
RToF=2.670818E1;
VNai=10.0;
kCai=1.5;
k2Cai=1.8E-3;
Vmuni= 0.04459;
VmNaCa=1.0E-7;
fCam = 3.0E-4;
ATPm = Cadm - ADPm;
% Acid-base dissociation equilibria and polynomia
H_mito_1000= H_mito/1000;
Mg_1000=Mg/1000;
KaidADP=6.2E-1;
KaidCa=5.0E-4;
KaPi=1.78E-7;
KaATP=3.31E-7;
KMgATP=6.46E-5;
KaADP=4.17E-7;
KMgADP= 5.62E-4;
KaSUC=6.3E-6;
KaH2O=1.0E-14;
ATP4 = ATPm / ( 1+ H_mito_1000/KaATP + Mg_1000/ KMgATP);
ATPMg= ATP4 * Mg_1000 / KMgATP;
HATP= ATP4 * H_mito_1000 / KaATP ;
ADP3= ADPm / ( 1+ H_mito_1000/KaADP + Mg_1000/ KMgADP);
% ADPMg= ADP3 * Mg_1000/KMgADP;
HADP= ADP3 * H_mito_1000/KaADP ;
H2Pi = Pim/(1+ KaPi/H_mito_1000);
ATP4_c= ATPc/(1+ Hi_cy/1000/KaATP + 1/1000/KMgATP);
ADP3_c= (CadTcy-ATPc)/ (1+ Hi_cy/1000/KaADP + 1/1000/KMgADP);
polyATP=1+ H_mito_1000/KaATP + Mg_1000/KMgATP;
polyADP=1+ H_mito_1000/KaADP + Mg_1000/KMgADP;
polyPi = 1+ H_mito_1000/KaPi;
polyH2O =1+ H_mito_1000/KaH2O;
SUC_poly=1+ H_mito_1000/KaSUC;
% pyruvate carboxylase
PyrCb=(1/(1+H_mito/PyrCbK1+PyrCbK2/H_mito))*PyrCbVmax*Pyr*ATPMg/(PyrCbKmPyr*ATPMg+PyrCbKmATP*Pyr+Pyr*ATPMg)*(AcCoA_m^2/(PyrCbKACoa^2+AcCoA_m^2));
PyrCb=(1/(1+H_mito/PyrCbK1+PyrCbK2/H_mito))*PyrCbVmax*Pyr*ATPMg/(PyrCbKmPyr*ATPMg+PyrCbKmATP*Pyr+Pyr*ATPMg);
% beta-oxidation

```

sf\_cpt1C16=1;  
V\_cpt1=3.0E-2;  
Kmcpt1\_C16CoA\_cy=0.0138;  
Kmcpt1\_Carn\_cy=0.125;  
Kmcpt1\_C16Carn\_cy=1.36;  
Kmcpt1\_CoA\_cy=0.407;  
Kicpt1\_MalCoA=0.0091;  
Keq\_cpt1=0.45;  
n\_cpt1=2.4799;  
MalCoA\_cy=0;  
Carn\_cy= 0.400;  
CoA\_cy=1.40;  
Carn\_mat=0.950;  
C16CoA\_cy= 0.01;  
Vf\_cact=2.1E1;  
Vr\_cact= 2.1E-5;  
Kmcact\_C16Carn\_cy=0.01;  
Kmcact\_Carn\_mat=0.130;  
Kmcact\_C16Carn\_mat=0.015;  
Kmcact\_Carn\_cy=0.130;  
Kicact\_C16Carn\_cy=0.056;  
Kicact\_Carn\_cy=0.200;  
Keq\_cact=1;  
sf\_cpt2C16=0.85;  
V\_cpt2=6.517E-3\*30;  
Kmcpt2\_C16Carn\_mat=0.051;  
Kmcpt2\_CoA\_mat=0.030;  
Kmcpt2\_C16CoA\_mat=0.038;  
Kmcpt2\_Carn\_mat=0.350;  
Keq\_cpt2=2.22;  
FADt\_mat=0.7;  
NADt\_mat=1.0;  
CoAT\_mat=1.0;  
sf\_vlcadC16=1;  
sf\_vlcadC14=0.80;  
sf\_vlcadC12=0.42;  
V\_vlcad=6.67E-4\*30;  
Kmvlcad\_C16CoA\_mat=0.0065;  
Kmvlcad\_C14CoA\_mat=0.004;  
Kmvlcad\_C12CoA\_mat=0.0027;  
Kmvlcad\_FAD\_mat=0.00012;  
Kmvlcad\_C16EnoylCoA\_mat=0.00108;  
Kmvlcad\_C14EnoylCoA\_mat=0.00108;  
Kmvlcad\_C12EnoylCoA\_mat=0.00108;  
Kmvlcad\_FADH\_mat=0.0242;  
Keq\_vlcad=6;  
sf\_lcadC16=0.9;



```

sf_lcadC14=1;
sf_lcadC12=0.95;
sf_lcadC10=0.85;
sf_lcadC8=0.4;
V_lcad=8.33E-4*30;
Kmlcad_C16CoA_mat=0.0025;
Kmlcad_C14CoA_mat=0.0074;
Kmlcad_C12CoA_mat=0.009;
Kmlcad_C10CoA_mat=0.0243;
Kmlcad_C8CoA_mat=0.123;
Kmlcad_FAD_mat=1.2E-6;
Kmlcad_C16EnoylCoA_mat=0.00108;
Kmlcad_C14EnoylCoA_mat=0.00108;
Kmlcad_C12EnoylCoA_mat= 0.00108;
Kmlcad_C10EnoylCoA_mat= 0.00108;
Kmlcad_C8EnoylCoA_mat= 0.00108;
Kmlcad_FADH_mat=0.0242;
Keq_lcad=6;
sf_mcadC12=0.68;
sf_mcadC10= 0.8;
sf_mcadC8= 0.87;
sf_mcadC6= 1;
sf_mcadC4= 0.12;
V_mcad= 8.35E-2*30;
Kmmcad_C12CoA_mat= 0.0057;
Kmmcad_C10CoA_mat= 0.0054;
Kmmcad_C8CoA_mat= 0.004;
Kmmcad_C6CoA_mat= 0.0094;
Kmmcad_C4CoA_mat= 0.135;
Kmmcad_FAD_mat= 0.00012;
Kmmcad_C12EnoylCoA_mat= 0.00108;
Kmmcad_C10EnoylCoA_mat= 0.00108;
Kmmcad_C8EnoylCoA_mat= 0.00108;
Kmmcad_C6EnoylCoA_mat= 0.00108;
Kmmcad_C4EnoylCoA_mat= 0.00108;
Kmmcad_FADH_mat=0.0242;
Keq_mcad=6;
sf_scadC6=0.3;
sf_scadC4=1;
V_scad= 8.35E-2*30;
Kmscad_C6CoA_mat=0.285;
Kmscad_C4CoA_mat= 0.0107;
Kmscad_FAD_mat= 0.00012;
Kmscad_C6EnoylCoA_mat= 0.00108;
Kmscad_C4EnoylCoA_mat= 0.00108;
Kmscad_FADH_mat=0.0242;
Keq_scad=6;

```

```

sf_crotC16=0.13;
sf_crotC14= 0.2;
sf_crotC12= 0.25;
sf_crotC10= 0.33;
sf_crotC8= 0.58;
sf_crotC6= 0.8;
sf_crotC4= 1;
V_crot=9.0E-2*30;
Kmcrot_C16EnoylCoA_mat= 0.150;
Kmcrot_C14EnoylCoA_mat= 0.100;
Kmcrot_C12EnoylCoA_mat= 0.025;
Kmcrot_C10EnoylCoA_mat= 0.025;
Kmcrot_C8EnoylCoA_mat= 0.025;
Kmcrot_C6EnoylCoA_mat= 0.025;
Kmcrot_C4EnoylCoA_mat= 0.040;
Kmcrot_C16OHCoA_mat=0.045;
Kmcrot_C14OHCoA_mat=0.045;
Kmcrot_C12OHCoA_mat=0.045;
Kmcrot_C10OHCoA_mat=0.045;
Kmcrot_C8OHCoA_mat=0.045;
Kmcrot_C6OHCoA_mat=0.045;
Kmcrot_C4OHCoA_mat=0.045;
Keq_crot=3.13;
AcacetylCoA_mat=C4KetoCoA_m;
Kicrot_AcacetylCoA_mat=0.0016;
sf_mschadC16=0.6;
sf_mschadC14=0.5;
sf_mschadC12=0.43;
sf_mschadC10= 0.64;
sf_mschadC8= 0.89;
sf_mschadC6= 1;
sf_mschadC4= 0.67;
V_mschad=1.6667E-1*30;
Kmmschad_C16OHCoA_mat= 0.0015;
Kmmschad_C14OHCoA_mat= 0.0018;
Kmmschad_C12OHCoA_mat= 0.0037;
Kmmschad_C10OHCoA_mat= 0.0088;
Kmmschad_C8OHCoA_mat= 0.0163;
Kmmschad_C6OHCoA_mat= 0.0286;
Kmmschad_C4OHCoA_mat= 0.0699;
Kmmschad_NAD_mat=0.0117;
Kmmschad_C16KetoCoA_mat= 0.0014;
Kmmschad_C14KetoCoA_mat= 0.0014;
Kmmschad_C12KetoCoA_mat= 0.0016;
Kmmschad_C10KetoCoA_mat= 0.0023;
Kmmschad_C8KetoCoA_mat= 0.0041;
Kmmschad_C6KetoCoA_mat= 0.0058;

```

Kmmschad\_C4KetoCoA\_mat= 0.0169;  
 Kmmschad\_NADH\_mat= 0.054;  
 Keq\_mschad=2.17\*10<sup>-4</sup>;  
 sf\_mckatC16=0.2;  
 sf\_mckatC14=0.2;  
 sf\_mckatC12=0.38;  
 sf\_mckatC10=0.75;  
 sf\_mckatC8=0.81;  
 sf\_mckatC6=1;  
 sf\_mckatC4=0.89;  
 V\_mckat=6.28E-2\*30;  
 Kmmckat\_C16KetoCoA\_mat= 0.0011;  
 Kmmckat\_C14KetoCoA\_mat= 0.0012;  
 Kmmckat\_C12KetoCoA\_mat= 0.0013;  
 Kmmckat\_C10KetoCoA\_mat= 0.0021;  
 Kmmckat\_C8KetoCoA\_mat= 0.0032;  
 Kmmckat\_C6KetoCoA\_mat= 0.0067;  
 Kmmckat\_C4KetoCoA\_mat= 0.0124;  
 Kmmckat\_CoA\_mat=0.0266;  
 Kmmckat\_C16CoA\_mat= 0.01383;  
 Kmmckat\_C14CoA\_mat= 0.01383;  
 Kmmckat\_C12CoA\_mat= 0.01383;  
 Kmmckat\_C10CoA\_mat= 0.01383;  
 Kmmckat\_C8CoA\_mat= 0.01383;  
 Kmmckat\_C6CoA\_mat= 0.01383;  
 Kmmckat\_C4CoA\_mat= 0.01383;  
 Kmmckat\_AcCoA\_mat= 0.3;  
 Keqmckat=1051;  
 sfmtpC16=1.5;  
 sfmtpC14=0.9;  
 sfmtpC12=0.81;  
 sfmtpC10=0.73;  
 sfmtpC8=0.64;  
 V\_mtp=3.0E-3;  
 Kmmtmp\_C16EnoylCoA\_mat=0.025;  
 Kmmtmp\_C14EnoylCoA\_mat=0.025;  
 Kmmtmp\_C12EnoylCoA\_mat=0.025;  
 Kmmtmp\_C10EnoylCoA\_mat=0.025;  
 Kmmtmp\_C8EnoylCoA\_mat=0.025;  
 Kmmtmp\_NAD\_mat=0.06;  
 Kmmtmp\_CoA\_mat=0.3;  
 Kmmtmp\_C16CoA\_mat= 0.01383;  
 Kmmtmp\_C14CoA\_mat= 0.01383;  
 Kmmtmp\_C12CoA\_mat= 0.01383;  
 Kmmtmp\_C10CoA\_mat= 0.01383;  
 Kmmtmp\_C8CoA\_mat= 0.01383;  
 Kmmtmp\_C6CoA\_mat= 0.01383;

```

Kmmtp_NADH_mat=      0.050;
Kmmtp_AcCoA_mat=0.030;
Kimtp_AcetoacetylCoA_mat= 0.030;
Keqmtp=0.71;
%Antioxidant systems and ROS production
kIDHNADP=8.72E-5;
kTHD=1.1875E-4;
kgrxm=3.6E-3;
kgrx=3.6E-3;
KeqGRX=1.37E-3;
GrxT= 0.002;
Vmimac=3.9085E-6;
shunt= 0.01;
EtCuZnSOD=3e-3;
EtMnSOD=3e-3;
NADPm_T=1.0E-1;
PSSGT= 0.001;      %PSSG total;
kcatPSH= 0.64;
EtPSH=0.8e-3;
kmGSH=0.75;
kactH2O2=1e-3;
KmGrx=0.01;
KmPSSG= 0.0005;
difH2O2_c=8.0E-3;
VGST_c=1.5E-8;
EtGPXm=10e-5;
EtGRm=1e-4;
kcat=1.7E1;
Etcac=5.0E-4;
EtGPX=1.E-2;
kGR=2.5E-3;
EtGR=5.0E-3;
EoTxPXm= 2.5;
EoTxPX=0.1;
Phi2Trx= 1.85;
Phi1Trx= 3.83;
TrxTm=0.025;
TrxT= 0.05;
Etxrm= 0.01;
Etxr=0.005;
KMTrxSS= 0.035;
KMnadph= 0.012;
kcXR= 22.75E-3;
% General parameters and expressions conservation relations
Vlcyt= 4.0;
Vlmat= 1.0;
NAD=NADt_mat-NADHm;

```

## Supplementary Material

$CoA\_mat = CoAT\_mat - (SCoA + C16CoA\_m + C16EnoylCoA\_m + C16OHCoA\_m + C16KetoCoA\_m + C14CoA\_m + C14EnoylCoA\_m + C14OHCoA\_m + C14KetoCoA\_m + C12CoA\_m + C12EnoylCoA\_m + C12OHCoA\_m + C12KetoCoA\_m + C10CoA\_m + C10EnoylCoA\_m + C10OHCoA\_m + C10KetoCoA\_m + C8CoA\_m + C8EnoylCoA\_m + C8OHCoA\_m + C8KetoCoA\_m + C6CoA\_m + C6EnoylCoA\_m + C6OHCoA\_m + C6KetoCoA\_m + C4CoA\_m + C4EnoylCoA\_m + C4OHCoA\_m + C4KetoCoA\_m + AcCoA\_m);$   
 $DpH = -\log_{10}(1.0E-4) + \log_{10}(H\_mito);$   
 $V4 = -2.303 * 2.670818E1 * DpH + Dpsim;$   
 % cytosolic metabolism of glucose  
 $GLUT4V = GLUT4\_kcat * (Glco - Glic);$   
 $HKV = HKVmax * (ATPc * Glic - (CadTcy - ATPc) * G6P / HKKapp) / (ATPc * Glic + HKKmAT * Glic + ATPc * HKKmGLC + HKKmAT * HKKmGLC * (1 + G6P / HKKmG6P + (CadTcy - ATPc) / HKKmAD + (CadTcy - ATPc) * G6P / HKKmAD / HKKmG6P));$   
 %  
 $PFKL = PFKLo * (((1 + ATPc / PFKKiATP) / (1 + d * ATPc / PFKKiATP)) * ((1 + e * AMP / PFKKaAMP) / (1 + AMP / PFKKaAMP)))^4;$   
 $PFKLc = PFKLo * (((1 + ATPc / PFKKiATP) / (1 + PFK\_d * ATPc / PFKKiATP)) * ((1 + PFK\_e * AMP\_c / PFKKaAMP) / (1 + AMP\_c / PFKKaAMP)) * ((1 + kmrgd(89) / PFKKiCit) / (1 + PFK\_f * kmrgd(89) / PFKKiCit)))^4;$   
 $PFKLc = PFKLo * (((1 + ATPc / PFKKiATP) / (1 + PFK\_d * ATPc / PFKKiATP)) * ((1 + PFK\_e * AMP\_c / PFKKaAMP) / (1 + AMP\_c / PFKKaAMP)) * ((1 + Cic / PFKKiCit) / (1 + PFK\_f * Cic / PFKKiCit)))^4;$   
 $PFKVmaxr = PFKVmax * PFKKmAD * PFKKmFBP / (PFKKmF6P * PFKKmAT * PFKKeq);$   
 $PFKalpha = PFKKmF6P * PFKKmAT / PFKKmpF6P / PFKKmpAT;$   
 $PFKDelta = (1 + G6P / PFKKmF6P) * (1 + ATPc / PFKKmAT) + (CadTcy - ATPc) / PFKKmAD + FbP / PFKKmFBP * (1 + (CadTcy - ATPc) / PFKKmAD);$   
 $PFKDeltap = (1 + G6P / PFKKmpF6P) * (1 + ATPc / PFKKmpAT) + (CadTcy - ATPc) / PFKKmpAD + FbP / PFKKmpFBP * (1 + (CadTcy - ATPc) / PFKKmpAD);$   
 $PFKV = (PFKVmax * (ATPc * G6P / PFKKmF6P / PFKKmAT) - PFKVmaxr * ((CadTcy - ATPc) * FbP / PFKKmFBP / PFKKmAD)) / PFKDelta * (1 + ...$   
 $PFKalpha * PFKLc * (PFKDeltap / PFKDelta)^3) / (1 + PFKLc * (PFKDeltap / PFKDelta)^4);$   
 %  
 $ALDVmaxr = ALDVmax * ALDKmG3P^2 / ALDKmFBP / ALDKeq;$   
 $ALDV = (ALDVmax * FbP / ALDKmFBP - ALDVmaxr * (G3P / ALDKmG3P)^2) / (1 + FbP / ALDKmFBP + 2 * G3P / ALDKmG3P);$   
 %  
 $GAPDVmaxr = GAPDVmax * GAPDKmG13BP / GAPDKmG3P * GAPDKmNADH / GAPDKmNAD / GAPDKmPi / GAPDKeq;$   
 $GAPDDen = 1 + G3P / GAPDKmG3P + ((NDP - NADHc) / GAPDKmNAD)^nGDH + Pi\_cy / GAPDKmPi + G3P / GAPDKmG3P * ((NDP - NADHc) / GAPDKmNAD)^nGDH + G3P / GAPDKmG3P * ((NDP - NADHc) / GAPDKmNAD)^nGDH * Pi\_cy / GAPDKmPi + G13bP / GAPDKmG13BP + (NADHc / GAPDKmNADH)^nGDH + G13bP / GAPDKmG13BP * (NADHc / GAPDKmNADH)^nGDH;$   
 $GAPDHV = (GAPDVmax * G3P / GAPDKmG3P * ((NDP - NADHc) / GAPDKmNAD)^nGDH * Pi\_cy / GAPDKmPi - GAPDVmaxr * (G13bP / GAPDKmG13BP * (NADHc / GAPDKmNADH)^nGDH)) / GAPDDen;$   
 %

$PGKV_{maxr} = PGKV_{max} * (PGKKmGP3 / PGKKmG13BP * PGKKmATP / PGKKmADP / PGKK_{eq});$   
 $PGKDen = 1 + G13bP / PGKKmG13BP + (CadTcy - ATPc) / PGKKmADP +$   
 $G13bP / PGKKmG13BP * (CadTcy - ATPc) / PGKKmADP + GP3 / PGKKmGP3 + ATPc / PGKKmATP$   
 $+ GP3 / PGKKmGP3 * ATPc / PGKKmATP;$   
 $PGKV = (PGKV_{max} * G13bP / PGKKmG13BP * (CadTcy - ATPc) / PGKKmADP -$   
 $PGKV_{maxr} * (GP3 / PGKKmGP3 * ATPc / PGKKmATP)) / PGKDen;$   
 %  
 $ENOLV_{maxr} = ENOLV_{max} * (ENOLKmPEP / ENOLKmGP3 / ENOL_{eq});$   
 $ENOLV = (ENOLV_{max} * GP3 / ENOLKmGP3 -$   
 $ENOLV_{maxr} * PEP / ENOLKmPEP) / (1 + GP3 / ENOLKmGP3 + PEP / ENOLKmPEP);$   
 %  
 $PKV_{maxr} = PKV_{max} * PFKKmAT * PKKmPyr / PKKmPEP / PKKmAD / PKK_{eq};$   
 $PKL = 1 * 10^{-(6.8)} * 1000 / Hi_{cy} / ((1 + PEP / PKKmPEP + Pyr / PKKmPyr)^4 * (1$   
 $+ FbP / PKKmFBP + GDP / PKKmGDP)^4);$   
 $PKrho = 1 / (1 + PKL);$   
 $PKV = (PKV_{max} * ((CadTcy - ATPc) * PEP / PKKmPEP / PKKmAD) - PKV_{maxr} * (ATPc *$   
 $Pyr / PKKmPyr / PKKmAT)) / (1 + PEP / PKKmPEP + (CadTcy - ATPc) / PKKmAD + (CadTcy -$   
 $ATPc) / PKKmAD * PEP / PKKmPEP + Pyr / PKKmPyr + ATPc / PKKmAT$   
 $+ Pyr / PKKmPyr * ATPc / PKKmAT) * PKrho;$   
 %  
 $LDHV_{maxr} = LDHV_{max} * LDHKmLAC * LDHKmNAD / LDHKmNADH / LDHKmPyr / LDH_{eq};$   
 $LDHV = (LDHV_{max} * (NADHc * Pyr / LDHKmPyr / LDHKmNADH) - LDHV_{maxr} * ((NDP - NADHc)$   
 $* LAC / LDHKmLAC / LDHKmNAD)) / (1 + Pyr / LDHKmPyr + NADHc / LDHKmNADH$   
 $+ NADHc / LDHKmNADH * Pyr / LDHKmPyr + (NDP - NADHc) / LDHKmNAD + LAC / LDHKmLAC$   
 $+ (NDP - NADHc) / LDHKmNAD * LAC / LDHKmLAC);$   
 %  
 $V_{amil} = (V_{maxamil} * GLY / K_{mamil} - Maltoside / K_{mamil}) / (1 + GLY / K_{mamil} + Maltoside / K_{mMaltoside});$   
 $V_{maxGPa} = V_{maxGPa} * K_{aGlyb} * K_{aig1p} / (K_{aGlyf} * K_{api} * K_{eqGP});$   
 $V_{GPa} = (V_{maxGPa} * Maltoside * Pi_{cy} / (K_{aGlyf} * K_{api}) -$   
 $V_{maxGPa} * (Maltoside * G1P / (K_{aGlyb} * K_{aig1p}))) / (1 + Maltoside / K_{aGlyf} + Pi_{cy} / K_{api} +$   
 $Maltoside / K_{aGlyb} + G1P / K_{aig1p} + Maltoside / K_{aGlyf} * Pi_{cy} / K_{api} + Maltoside / K_{aGlyb} * G1P / K_{aig1p});$   
 $V_{maxGPb} = V_{maxGPb} * K_{ibGlyb} * K_{big1p} / (K_{ibGlyf} * K_{bpi} * K_{eqGP});$   
 $V_{GPb} = (V_{maxGPb} * Maltoside * Pi_{cy} / (K_{ibGlyf} * K_{bpi}) -$   
 $V_{maxGPb} * (Maltoside * G1P / (K_{ibGlyb} * K_{big1p}))) / (1 + Maltoside / K_{ibGlyf} + Pi_{cy} / K_{bpi} +$   
 $Maltoside / K_{ibGlyb} + G1P / K_{big1p} + Maltoside / K_{ibGlyf} * Pi_{cy} / K_{bpi} + Maltoside / K_{ibGlyb} *$   
 $G1P / K_{big1p}) * (AMP_c^{nH} / K_{pAMP}) / (1 + AMP_c^{nH} / K_{pAMP});$   
 $V_{maxrPGLM} = V_{maxPGLM} * K_{G6P} / (K_{G1P} * K_{eqPGLM});$   
 $VPGLM = (V_{maxPGLM} * G1P / K_{G1P} - V_{maxrPGLM} * G6P / K_{G6P}) / (1 + G6P / K_{G6P} + G1P / K_{G1P});$   
 %Pentose Phosphate pathway  
 $G6PDHV = G6PDHV_{max} * G6P * (NTP - NADPHc) / G6PDHKmG6P / G6PDHKmNADP / (1 + (NTP -$   
 $NADPHc) / G6PDHKmNADP * (1 + G6P / G6PDHKmG6P) + NADPHc / G6PDHKmNADPH...$   
 $+ ATPc / G6PDHKmATP);$   
 $N1 = P6GDHk1 * P6GDHk3 * P6GDHk5 * P6GDHk7 * P6GDHk9;$   
 $N2 = P6GDHk2 * P6GDHk4 * P6GDHk6 * P6GDHk8 * P6GDHk10;$   
 $D1 = P6GDHk2 * P6GDHk9 * (P6GDHk4 * P6GDHk6 + P6GDHk5 * P6GDHk6 + P6GDHk5 * P6GDHk7);$   
 $D2 = P6GDHk1 * P6GDHk9 * (P6GDHk4 * P6GDHk6 + P6GDHk5 * P6GDHk6 + P6GDHk5 * P6GDHk7);$   
 $D3 = P6GDHk3 * P6GDHk5 * P6GDHk7 * P6GDHk9;$

$D4=P6GDHk2*P6GDHk4*P6GDHk6*P6GDHk8;$   
 $D5=P6GDHk2*P6GDHk10*(P6GDHk4*P6GDHk6+P6GDHk5*P6GDHk6+P6GDHk5*P6GDHk7);$   
 $D6=P6GDHk1*P6GDHk3*(P6GDHk5*P6GDHk5+P6GDHk5*P6GDHk9+P6GDHk6*P6GDHk9+P6GDHk7*P6GDHk9);$   
 $D7=P6GDHk1*P6GDHk4*P6GDHk6*P6GDHk8;$   
 $D8=P6GDHk3*P6GDHk5*P6GDHk7*P6GDHk10;$   
 $D9=P6GDHk8*P6GDHk10*(P6GDHk2*P6GDHk4+P6GDHk2*P6GDHk5+P6GDHk2*P6GDHk6+P6GDHk4*P6GDHk6);$   
 $D10=P6GDHk1*P6GDHk3*P6GDHk8*(P6GDHk5*P6GDHk6);$   
 $D11=P6GDHk3*P6GDHk8*P6GDHk10*(P6GDHk5*P6GDHk6);$   
 $P6GDHDen=D1+D2*(NTP-NADPHc)+D3*GP6+D4*Ru5P+D5*NADPHc+D6*GP6*(NTP-NADPHc)+D7*Ru5P*(NTP-NADPHc)+D8*GP6*NADPHc+D9*Ru5P*NADPHc+D10*GP6*(NTP-NADPHc)*Ru5P+D11*GP6*Ru5P*NADPHc;$   
 $P6GDHV=P6GDHVmax*(N1*GP6*(NTP-NADPHc)-N2*Ru5P*NADPHc)/P6GDHDen;$   
 $R5PIV=R5PIVmax*(R5PIk3*Ru5P/R5PIKmRu5P-R5PIk2*R5P/R5PIKmR5P)/(1+Ru5P/R5PIKmRu5P+R5P/R5PIKmR5P);$   
 $Ru5PEV=Ru5PEVmax*(Ru5PEk3*Ru5P/Ru5PEKmRu5P-Ru5PEk2*X5P/Ru5PEKmXu5P)/(1+Ru5P/Ru5PEKmRu5P+X5P/Ru5PEKmXu5P);$   
 $NAc1=RTAc1*RTAc3*RTAc5*RTAc7;$   
 $NAc2=RTAc2*RTAc4*RTAc6*RTAc8;$   
 $DAc1=RTAc1*RTAc3*(RTAc6+RTAc7);$   
 $DAc2=RTAc5*RTAc7*(RTAc2+RTAc3);$   
 $DAc3=RTAc2*RTAc4*(RTAc6+RTAc7);$   
 $DAc4=RTAc6*RTAc8*(RTAc2+RTAc3);$   
 $DAc5=RTAc1*RTAc5*(RTAc3+RTAc7);$   
 $DAc6=RTAc4*RTAc8*(RTAc2+RTAc6);$   
 $DAc7=RTAc5*RTAc8*(RTAc2+RTAc3);$   
 $DAc8=RTAc1*RTAc4*(RTAc6+RTAc7);$   
 $RTAcDen=DAc1*X5P+DAc2*R5P+DAc3*G3P+DAc4*S7P+DAc5*X5P*R5P+DAc6*G3P*S7P+DAc7*R5P*S7P+DAc8*G3P*X5P;$   
 $RTAcV=RTAcVmax*(NAc1*X5P*R5P-NAc2*G3P*S7P)/RTAcDen;$   
 $NAc21=RTAc2k1*RTAc2k3*RTAc2k5*RTAc2k7;$   
 $NAc22=RTAc2k2*RTAc2k4*RTAc2k6*RTAc2k8;$   
 $DAc21=RTAc2k1*RTAc2k3*(RTAc2k6+RTAc2k7);$   
 $DAc22=RTAc2k5*RTAc2k7*(RTAc2k2+RTAc2k3);$   
 $DAc23=RTAc2k2*RTAc2k4*(RTAc2k6+RTAc2k7);$   
 $DAc24=RTAc2k6*RTAc2k8*(RTAc2k2+RTAc2k3);$   
 $DAc25=RTAc2k1*RTAc2k5*(RTAc2k3+RTAc2k7);$   
 $DAc26=RTAc2k4*RTAc2k8*(RTAc2k2+RTAc2k6);$   
 $DAc27=RTAc2k5*RTAc2k8*(RTAc2k2+RTAc2k3);$   
 $DAc28=RTAc2k1*RTAc2k4*(RTAc2k6+RTAc2k7);$   
 $RTAc2Den=DAc21*X5P+DAc22*E4P+DAc23*G3P+DAc24*G6P+DAc25*X5P*E4P+DAc26*G3P*G6P+DAc27*E4P*G6P+DAc28*X5P*G3P;$   
 $RTAc2V=RTAc2Vmax*(NAc21*X5P*E4P-NAc22*G3P*G6P)/RTAc2Den;$   
 $NAI1=RTAlk1*RTAlk3*RTAlk5*RTAlk7;$   
 $NAI2=RTAlk2*RTAlk4*RTAlk6*RTAlk8;$   
 $DAI1=RTAlk1*RTAlk3*(RTAlk6+RTAlk7);$

$DAI2=RTA1k5*RTA1k7*(RTA1k2+RTA1k3);$   
 $DAI3=RTA1k2*RTA1k4*(RTA1k6+RTA1k7);$   
 $DAI4=RTA1k6*RTA1k8*(RTA1k2+RTA1k3);$   
 $DAI5=RTA1k1*RTA1k5*(RTA1k3+RTA1k7);$   
 $DAI6=RTA1k4*RTA1k8*(RTA1k2+RTA1k6);$   
 $DAI7=RTA1k5*RTA1k8*(RTA1k2+RTA1k3);$   
 $DAI8=RTA1k1*RTA1k4*(RTA1k6+RTA1k7);$   
 $RTAIDen=DAI1*S7P+DAI2*G3P+DAI3*E4P+DAI4*G6P+DAI5*S7P*G3P+DAI6*E4P*G6P+$   
 $DAI7*G3P*G6P+DAI8*S7P*E4P;$   
 $RTAIV=RTAIVmax*(NA11*S7P*G3P-NA12*E4P*G6P)/RTAIDen;$   
 %  
 $ALR1Den=DALR1+DALR2*NADPHc+DALR3*G1ci+DALR4*Sor+DALR5*(NTP-$   
 $NADPHc)+DALR6*G1ci*NADPHc+DALR7*Sor*NADPHc+DALR8*G1ci*(NTP-NADPHc)+$   
 $DALR9*Sor*(NTP-NADPHc)+DALR10*G1ci*NADPHc*Sor+DALR11*G1ci*Sor*(NTP-$   
 $NADPHc);$   
 $ALR1V=ALDREmax*(ALR1V1*G1ci*NADPHc-ALR1V2*Sor*(NTP-$   
 $NADPHc)/ALR1Keq)/ALR1Den;$   
 $SoDHVrmax=SoDHVmax*(SoDHKmFRU*SoDHKmNADH/SoDHKmSorb/SoDHKmNAD/SoDH$   
 $Keq);$   
 $SoDHV=SoDHVmax*(NDP-NADHc)*Sor/(SoDHKiNAD*SoDHKmSorb+SoDHKmSorb*(NDP-$   
 $NADHc)+SoDHKmNAD*Sor+(NDP-NADHc)*Sor)-SoDHVrmax*NADHc*FRU$   
 $/(SoDHKiNADH*SoDHKmFRU+SoDHKmFRU*NADHc+SoDHKmNADH*FRU+NADHc*FRU);$   
 $XyDHVrmax=XyDHVmax*(XyDHKmXy*XyDHKmNADH/XyDHKmXyOH/XyDHKmNAD$   
 $/XyDHKeq);$   
 $XyDHV=XyDHVmax*NADHc*X5P/(XyDHKiNADH*XyDHKmXy+XyDHKmXy*NADHc$   
 $+XyDHKmNADH*X5P+NADHc*X5P)-XyDHVrmax*(NDP-NADHc)*XyOH/(XyDHKiNAD$   
 $*XyDHKmXyOH+XyDHKmXyOH*(NDP-NADHc)+XyDHKmNAD*XyOH+(NDP-$   
 $NADHc)*XyOH);$   
 %  
 $HYdroATPV=HydroIVmax*ATPc/(HydroKmATP+ATPc);$   
 $NADHDemV=NADHDemVmax*(NADHc/NADHDemKmNADH-(NDP-$   
 $NADHc)/NADHDemKmNAD)/(1+NADHc/NADHDemKmNADH+(NDP-$   
 $NADHc)/NADHDemKmNAD);$   
 $FRUTV=ktfru*FRU/(kmFru+FRU);$   
 $XiOHTV=ktXyOH*XyOH/(kmXyOH+XyOH);$   
 $NADPHDemV=NADPHDemVmax*(NADPHc/NADPHDemKmNADPH-(NTP-NADPHc)$   
 $/NADPHDemKmNADP)/(1+NADPHc/NADPHDemKmNADPH+(NTP-NADPHc)$   
 $/NADPHDemKmNADP);$   
 %% Pyruvate dehydrogenase, pyruvate carrier  
 $Pdh\_DP=(1+Cam/EC\_PDPCa)*((NADm/NADHm)^n\_NAD*f\_PDPNAD\_H+1);$   
 $Pdh\_P=(1+(AcCoA\_m/CoA\_mat)^n\_Coa*f\_PDKAcCoA)*(1+ATPm/EC\_PDKATP)*(1+$   
 $EC\_PDKADP/ADPm)*(1+EC\_PDKPyr/Pyrm);$   
 $AlphaPDH=Pdh\_DP/(Pdh\_P+Pdh\_DP);$   
 $PyrDHDen=(1+Pyrm/PyrDHKmPyr)*(CoA\_mat/PyrDHKmCoA+1+CoAT\_mat/PyrDHXCoA*(1$   
 $+CoA\_mat/CoAT\_mat))/(NADm/PyrDHKmNAD+1+NADt\_mat/PyrDHXNAD*(1+$   
 $NADm/NADt\_mat));$



## Supplementary Material

```

PyrDH = PyrDHVmax*AlphaPDH*NADm/PyrDhKmNAD*PyrM/PyrDhKmPyr*CoA_mat
/PyrDhKmCoA/PyrDhDen;
PyrCV=PyC_Vmax*Pyr/((Pyr+PyC_KmPyr)*(1+H_mito/PyC_Kh1));
VAATm=kfAATm*(GLUm*Oaa-aKGm*ASPm/KeqAAT);
% Citrate Carrier
VCiC=CiCVmax*(CITm/CiCKm_Cim*MALc/CiCKm_MALc - MALm/CiCKm_Malm*Cic
/CiCKm_Cic)/((1+MALm/CiCKm_Malm*Cic/CiCKm_Cic+ MALm/CiCKm_Malm+Cic
/CiCKm_Cic+MALc/CiCKm_MALc*CITm/CiCKm_Cim+MALc/CiCKm_MALc+
CITm/CiCKm_Cim)*(1+Hi_cy/CiCKh1+CicKh2/Hi_cy));
%% Metabolic rate expressions TCA cycle and oxidative phosphorylation
VAREN=1.35E18*sqrt(NADHm/NADm);
VNOden=1/((exp(3.0E2/2.670818E1)+2.077E-18*exp(3.0E2/2.670818E1)*VAREN) + (1.728E-9
+1.059E-26*VAREN)*exp(5.1/2.670818E1*V4));
VHNe=6*RhoREN*(6.394E-13*VAREN-(6.394E-13 + 1.762E-16)*exp(5.1/2.670818E1*V4))
*VNOden;
VNO=0.5*RhoREN*((6.394E-13+2.656E-22*exp(3.0E2/2.670818E1)+8.632E-30*
exp(5.1/2.670818E1*V4))*VAREN-6.394E-13*exp(5.1/2.670818E1*V4))*VNOden;
Kresf_app=kresf/SUC_poly;
VARSDH=2.670818E1*(log(Kresf_app*sqrt(Succ/FUM)));
VHSDHden=RhoSDH/((1+2.077E-18*exp(VARSDH/2.670818E1))*exp(2.0E2/2.670818E1)
+(1.728E-9+ 1.059E-26*exp(VARSDH/2.670818E1))*exp(3.4/2.670818E1*V4))/(1+Oaa/1.5E-1);
VHSDH=4*(6.394E-13*exp(VARSDH/2.670818E1)-(6.394E-13+1.762E-16)*exp(3.4/2.670818E1
*V4))*VHSDHden;
FAD=(FADt_mat-FADH_m);
Ketf_app=ketf/polyH2O;
VARETF=2.670818E1*(log(Ketf_app*sqrt(FADH_m/FAD)));
VETFHden=RhoETF/((1+2.077E-18*exp(VARETF/2.670818E1))*exp(2.0E2/2.670818E1)
+(1.728E-9 + 1.059E-26*exp(VARETF/2.670818E1))*exp(3.4/2.670818E1*V4));
VETFH=4*(6.394E-13*exp(VARETF/2.670818E1)-(6.394E-13+1.762E-16)*exp(3.4/2.670818E1
*V4))*VETFHden;
VO2ETF=5.0E-1*((6.394E-13+2.656E-22*exp(2.0E2/2.670818E1))*exp(VARETF/2.670818E1)
- (6.394E-13-8.632E-30*exp(VARETF/2.670818E1))*exp(3.4/2.670818E1*V4))*VETFHden;
KATPase_app=KeqF1*H_mito_1000*polyATP*polyH2O/(polyADP*polyPi);
VAF1=KATPase_app/Pim*(ATPMg/(ADP3+HADP));
VHuden=-RhoF1/(exp(1.5E2/2.670818E1) + 1.346E-4*exp(1.5E2/2.670818E1)*VAF1 +
(7.739E-7+6.65E-15*VAF1)*exp(3/2.670818E1*V4));
VATPase=((1.656E-6+9.651E-17*exp(1.5E2/2.670818E1)-4.585E-17*exp(3/2.670818E1*V4))
*VAF1-1.656E-8*exp(3/2.670818E1*V4))*VHuden;
Vhu=(3.0E2*1.656E-8+3.0E2*1.656E-8*VAF1-3*(1.656E-8+3.373E-10)*exp(3/2.670818E1
*V4))*VHuden;
VANT=ANTVm*(1-(ATP4_c*ADP3)/(ADP3_c*ATP4))*exp(-Dpsim/2.670818E1)/((1
+ATP4_c/(ADP3_c)*exp(-1.8721E-2*Dpsim))*(1+ADP3/(ATP4)));
V2FRTdsi=2*(Dpsim-Dpsio)/RTof;
Vuniden((((1+Cai/kCai)^4)+1.1E2/((1+Cai/k2Cai)^(2.8)))*(1-exp(-V2FRTdsi)));
Vuni=(Vmuni/kCai*Cai*V2FRTdsi*(1+Cai/kCai)^3)/Vuniden;
VnaCa=VmNaCa*exp(2.5E-1*V2FRTdsi)*Cam/(Cai*((1+9.4/VNai)^3)*(1+3.75E-4/Cam));
Vhleak=gh*(1+100.0*C16CoA_cy^4/(C16CoA_cy+3.5E-2)^4)*V4;

```

$VCS = KCS * AcCoA\_m * Oaa / (KcsiacCoA * KcsOaa * (1 + CoA\_mat / KcsicoA) + KcsacCoA * (1 + CoA\_mat / KcsicoA) * Oaa + KcsOaa * AcCoA\_m + AcCoA\_m * Oaa);$   
 $VACO = kfACO * (CITm - ISOm / KeqACO);$   
 $Va = 1 / ((1 + ADP3 / KaidADP) * (1 + Cam / KaidCa));$   
 $Vi = 1 + NADHm / 1.9E-1;$   
 $Vb = 1.0 + H\_mito / IDHkh\_1 + IDHkh\_2 / H\_mito;$   
 $VIDH = kfidh * 1.09E-1 / (Vb + 9.23E-1 / NADm * Vi + ((1.52E-2 / ISOm)^2) * Va * (1 + 9.23E-1 / NADm * Vi));$   
 $VKGa = 1 / ((1 + 1.2987E1) * (1 + Cam / KkgCa));$   
 $VKGDH = kfKG * 5E-1 / (1.0 + H\_mito / IDHkh\_1a + IDHkh\_2a / H\_mito + VKGa * (3.0E1 / aKGm)^{1.2} + VKGa * (3.87E1 / NADm));$   
 $KSLeq\_app = KSLeq * SUC\_poly * polyATP / (polyADP * polyPi);$   
 $VSL = KfSL * (SCoA * Pim * ADPm - Succ * (ATP4 + HATP) * CoA\_mat / KSLeq\_app);$   
 $VO2SDH = 5.0E-1 * ((6.394E-13 + 2.656E-22 * \exp(2.0E2 / 2.670818E1)) * \exp(VARS DH / 2.670818E1) - (6.394E-13 - 8.632E-30 * \exp(VARS DH / 2.670818E1)) * \exp(3.4 / 2.670818E1 * V4)) * VHSDHden;$   
 $VFH = kfFH * (FUM - MALm / 1);$   
 $V26 = (1 / (1 + MDHk hm3 / H\_mito + MDHk hm3 * MDHk hm4 / (H\_mito^2)))^2;$   
 $V27 = 1 / (1 + H\_mito / MDHk hm1 + (H\_mito^2) / (MDHk hm1 * MDHk hm2)) + MDHk moff;$   
 $VMDHm = kfMDH * V26 * V27 * (MALm * NADm) / ((MDHKm\_MALm * MDHKi\_NAD + MDHKm\_MALm * NADm + MDHKm\_NADm * MALm + NADm * MALm + MDHKm\_NADm * MALm * NADHm / MDHKi\_NADHm + NADm * MALm * Oaa / MDHKi\_Oaam) + V1oV2m / KeqMDH * (MDHKm\_NADHm * Oaa + MDHKm\_Oaam * NADHm + Oaa * NADHm + MDHKm\_NADHm * NADm * Oaa / MDHKi\_NAD + MALm * Oaa * NADHm / MDHKi\_MALm));$   
 %% Ionic transport expressions  
 $Nam = -2 / 3.0E-4 * Cam - ADPm - 1.812E-3 * Dpsim - H\_mito / 1.0E-5 + Pim + 1.01E1;$   
 $VBeta1p = (1.6E-1 * 2.4E1 * Hi\_cy) / (1.585E-4 * 2.4E1 + 2.4E1 * Hi\_cy + 1.585E-4 * VNai);$   
 $VBeta1n = (9.39E-2 * 2.4E1 * H\_mito) / (1.585E-4 * 2.4E1 + 2.4E1 * H\_mito + 1.585E-4 * Nam);$   
 $VBeta2p = (2.52E-2 * 1.585E-4 * Nam) / (1.585E-4 * 2.4E1 + 2.4E1 * H\_mito + 1.585E-4 * Nam);$   
 $VBeta2n = (4.29E-2 * 1.585E-4 * VNai) / (1.585E-4 * 2.4E1 + 2.4E1 * Hi\_cy + 1.585E-4 * VNai);$   
 $pHm = -\log_{10}(H\_mito) + 3;$   
 $VNaH = Conc\_NHE * (((VBeta1p * VBeta2p) - (VBeta1n * VBeta2n)) / (VBeta1p + VBeta1n + VBeta2p + VBeta2n)) / (1 + 10^{(3 * (pHm - 8.52))});$   
 $VPiC = VmPiC / 60000 * (9.0E1 * Pi\_cy * 1.0E-8 / H\_mito / (1.106E1 * 4.084E-5) - 9.0E1 * H2Pi * 1.0E-4 / (1.106E1 * 4.084E-5)) / (1 + Pi\_cy / 1.106E1 + 1.0E-8 / H\_mito / 4.084E-5 + Pi\_cy * 1.0E-8 / H\_mito / (1.106E1 * 4.084E-5) + H2Pi / 1.106E1 + 1.0E-4 / 4.084E-5 + H2Pi * 1.0E-4 / (1.106E1 * 4.084E-5));$   
 %% Production of oxygen radicals, antioxidant defenses and regeneration of NADPH  
 $VNADPm = NADPm\_T - NADPHm;$   
 $VdenID\_NADP = (1 + H\_mito / 5.0E-1) * (1 + ISOm / 3.9E-3 + VNADPm / 6.7E-3 * (1 + 2.0E-6 / VNADPm) + aKGm / 5.1E-1 + NADPHm / 1.2E-2 + ISOm / 3.9E-3 * VNADPm / 6.7E-3 * (1 + 2.0E-6 / VNADPm) + aKGm / 5.1E-1 * NADPHm / 1.2E-2 + ISOm / 3.9E-3 * NADPHm / 1.2E-2 + aKGm / 5.1E-1 * VNADPm / 6.7E-3 * (1 + 2.0E-6 / VNADPm));$   
 $VIDH\_NADP = (kIDHNADP * ISOm / 3.9E-3 * VNADPm / 6.7E-3 * (1 + 2.0E-6 / VNADPm) - kIDHNADP / 16 * aKGm / 5.1E-1 * NADPHm / 1.2E-2) / VdenID\_NADP;$   
 $VDNADP = \exp(3.7441E-3 * V4);$   
 $VDNAD = \exp(1 - 3.7441E-3 * V4);$   
 $VTHDen = 1 + NADHm / 1.0E-2 + NADm / 1.25E-1 + VNADPm / 1.7E-2 + NADPHm / 2.0E-2 + NADHm / 1.0E-2 * VNADPm / 1.7E-2 * VDNADP + NADPHm / 2.0E-2 * NADHm / 1.0E-2 * VDNAD + NADm / 1.25E-1 * VNADPm / 1.7E-2 * VDNADP * VDNAD + NADHm / 1.0E-2 * NADPHm / 2.0E-2;$

$V_{THD} = (k_{THD} * 1.174737 * NADH_m / 1.0E-2 * VNADP_m / 1.7E-2 * VDNADP - 10 * k_{THD} * NAD_m / 1.25E-1 * NADPH_m / 2.0E-2 * VDNAD) / V_{THDen}$ ;  
 $JH = -V_{HNe} - V_{HSDH} - V_{ETFH} + V_{hu} + V_{NaH} + V_{PiC} + V_{hleak} + V_{THD}$ ;  
 %%  
 $V_{IMAC} = (1.0E-3 + 1.0E4 / (1 + 1.0E-2 / SO2_i)) * (3.5E-8 + V_{mimac} / (1 + \exp(7.0E-2 * (4.0 + D_{psim})))) * D_{psim}$ ;  
 $V_{trROS} = -1.0E-1 * (-D_{psim} - 2.6730818E1 * \log(SO2_m / SO2_i)) / D_{psim} * V_{IMAC}$ ;  
 $V_{MnSOD} = 2 * 1.2E3 * 2.5E-4 * (1.2E3 + 2.4E1 * (1 + H2O2_m / 5.0E-1)) * Et_{MnSOD} * SO2_m / (2.5E-4 * (2 * 1.2E3 + 2.4E1 * (1 + H2O2_m / 5.0E-1)) + 1.2E3 * 2.4E1 * (1 + H2O2_m / 5.0E-1) * SO2_m)$ ;  
 $V_{CuZnSOD} = 2 * 1.2E3 * 2.5E-4 * (1.2E3 + 2.4E1 * (1 + H2O2_i / 5.0E-1)) * Et_{CuZnSOD} * SO2_i / (2.5E-4 * (2 * 1.2E3 + 2.4E1 * (1 + H2O2_i / 5.0E-1)) + 1.2E3 * 2.4E1 * (1 + H2O2_i / 5.0E-1) * SO2_i)$ ;  
 $V_{GPX_m} = Et_{GPX_m} * H2O2_m * GSH_m / (5.0E-3 * GSH_m + 7.5E-1 * H2O2_m)$ ;  
 $V_{GR_m} = k_{GR} * Et_{GR_m} / (1 + 6.0E-2 / GSSG_m + 1.5E-2 / NADPH_m + 6.0E-2 / GSSG_m * 1.5E-2 / NADPH_m)$ ;  
 $V_{GPX} = Et_{GPX} * H2O2_i * GSH_i / (5.0E-3 * GSH_i + 7.5E-1 * H2O2_i)$ ;  
 $V_{GR} = k_{GR} * Et_{GR} / (1 + 6.0E-2 / GSSG_i + 1.5E-2 / NADPH_c + 6.0E-2 / GSSG_i * 1.5E-2 / NADPH_c)$ ;  
 $V_{GRX_m} = k_{grx_m} * Keq_{GRX} * GSH_m^2 * GrxT * PSSG_m / ((GSSG_m + Keq_{GRX} * GSH_m^2) * (Keq_{GRX} * GSH_m^2 * GrxT / (GSSG_m + Keq_{GRX} * GSH_m^2) + Km_{Grx}) * (PSSG_m + Km_{PSSG}))$ ;  
 $V_{GRX} = k_{grx} * Keq_{GRX} * GSH_i^2 * GrxT * PSSG_i / ((GSSG_i + Keq_{GRX} * GSH_i^2) * (Keq_{GRX} * GSH_i^2 * GrxT / (GSSG_i + Keq_{GRX} * GSH_i^2) + Km_{Grx}) * (PSSG_i + Km_{PSSG}))$ ;  
 $TrxSS_m = TrxT_m - TrxSH2_m$ ;  
 $TrxSS = TrxT - TrxSH2$ ;  
 $V_{TxPX_m} = Eo_{TxPX_m} * H2O2_m * TrxSH2_m / (\Phi_2 Trx * TrxSH2_m + \Phi_1 Trx * H2O2_m)$ ;  
 $V_{TxPX} = Eo_{TxPX} * H2O2_i * TrxSH2 / (\Phi_2 Trx * TrxSH2 + \Phi_1 Trx * H2O2_i)$ ;  
 $V_{TxR_m} = txr_m * kc_{XR} / (1 + Km_{TrxSS} / TrxSS_m + Km_{nadph} / NADPH_m + Km_{TrxSS} / TrxSS_m * Km_{nadph} / NADPH_m)$ ;  
 $V_{TxR} = Etxr * kc_{XR} / (1 + Km_{TrxSS} / TrxSS + Km_{nadph} / NADPH_c + Km_{TrxSS} / TrxSS * Km_{nadph} / NADPH_c)$ ;  
 $V_{difH2O2} = difH2O2_c * (H2O2_m - H2O2_i)$ ;  
 $V_{cat} = 2 * k_{cat} * E_{cat} * H2O2_i * \exp(-5.0E-2 * H2O2_i)$ ;  
 $V_{GST} = V_{GST}_c * (GSH_i - GSH_m) / (GSH_i + 2.6)$ ;  
 $V_{PSSG_m} = k_{cat} PSH * Et_{PSH} * (PSSG_T - PSSG_m) / (1 + (km_{GSH} / GSH_m) / (1 + (H2O2_m / k_{act} H2O2)))$ ;  
 $V_{PSSG_i} = k_{cat} PSH * Et_{PSH} * (PSSG_T - PSSG_i) / (1 + (km_{GSH} / GSH_i) / (1 + (H2O2_i / k_{act} H2O2)))$ ;  
 %% beta - Oxidation (from a liver model by van Eunen, ..., and Bakker, 2012)  
 $V_{cpt1C16} = sf_{cpt1C16} * V_{cpt1} * ((C16CoA_{cy} * Carn_{cy}) / (Km_{cpt1}_{C16CoA_{cy}} * Km_{cpt1}_{Carn_{cy}} - (C16Carn_{cy} * CoA_{cy}) / (Km_{cpt1}_{C16Carn_{cy}} * Km_{cpt1}_{CoA_{cy}} * Keq_{cpt1}))) / ((1 + C16CoA_{cy} / Km_{cpt1}_{C16CoA_{cy}} + C16Carn_{cy} / Km_{cpt1}_{C16Carn_{cy}} + (MalCoA_{cy} / Kic_{cpt1}_{MalCoA})^{(n_{cpt1})}) * (1 + Carn_{cy} / Km_{cpt1}_{Carn_{cy}} + CoA_{cy} / Km_{cpt1}_{CoA_{cy}}))$ ;  
 $V_{actC16} = V_{f_{act}} * ((C16Carn_{cy} * Carn_{mat} - 1.0E-6 * (C16Carn_m * Carn_{cy}) / Keq_{act})) / ((C16Carn_{cy} * Carn_{mat} + Km_{act}_{Carn_{mat}} * C16Carn_{cy} + Km_{act}_{C16Carn_{cy}} * Carn_{mat} * (1 + Carn_{cy} / Kic_{act}_{Carn_{cy}}) + V_{f_{act}} / (V_{r_{act}} * Keq_{act}) * (Km_{act}_{Carn_{cy}} * C16Carn_m * (1 + C16Carn_{cy} / Kic_{act}_{C16Carn_{cy}}) + Carn_{cy} * (Km_{act}_{C16Carn_{mat}} + C16Carn_m))))$ ;  
 $V_{cpt2C16} = sf_{cpt2C16} * V_{cpt2} * ((C16Carn_m * CoA_{mat}) / (Km_{cpt2}_{C16Carn_{mat}} * Km_{cpt2}_{CoA_{mat}} - (C16CoA_m * Carn_{mat}) / (Km_{cpt2}_{C16Carn_{mat}} * Km_{cpt2}_{CoA_{mat}} * Keq_{cpt2}))) / ((1 + (C16Carn_m / Km_{cpt2}_{C16Carn_{mat}} + C16CoA_m / Km_{cpt2}_{C16CoA_{mat}})) * (1 + CoA_{mat} / Km_{cpt2}_{CoA_{mat}} + Carn_{mat} / Km_{cpt2}_{Carn_{mat}}))$

















$$V_{mckatC6} = sf_{mckatC6} * V_{mckat} * ((C6KetoCoA\_m * CoA\_mat) / ((Kmmckat\_C6KetoCoA\_mat * Kmmckat\_CoA\_mat) - (C4CoA\_m * AcCoA\_m) / ((Kmmckat\_C6KetoCoA\_mat * Kmmckat\_CoA\_mat * Keqmckat))) / (1 + ((C16KetoCoA\_m / Kmmckat\_C16KetoCoA\_mat + C16CoA\_m / Kmmckat\_C16CoA\_mat + C14KetoCoA\_m / Kmmckat\_C14KetoCoA\_mat + C14CoA\_m / Kmmckat\_C14CoA\_mat + C12KetoCoA\_m / Kmmckat\_C12KetoCoA\_mat + C12CoA\_m / Kmmckat\_C12CoA\_mat + C10KetoCoA\_m / Kmmckat\_C10KetoCoA\_mat + C10CoA\_m / Kmmckat\_C10CoA\_mat + C8KetoCoA\_m / Kmmckat\_C8KetoCoA\_mat + C8CoA\_m / Kmmckat\_C8CoA\_mat + C6KetoCoA\_m / Kmmckat\_C6KetoCoA\_mat + C6CoA\_m / Kmmckat\_C6CoA\_mat + C4KetoCoA\_m / Kmmckat\_C4KetoCoA\_mat + C4CoA\_m / Kmmckat\_C4CoA\_mat) + AcCoA\_m / Kmmckat\_AcCoA\_mat)) * (1 + CoA\_mat / Kmmckat\_CoA\_mat + AcCoA\_m / Kmmckat\_AcCoA\_mat));$$

$$V_{mckatC4} = sf_{mckatC4} * V_{mckat} * ((C4KetoCoA\_m * CoA\_mat) / ((Kmmckat\_C4KetoCoA\_mat * Kmmckat\_CoA\_mat) - (AcCoA\_m * AcCoA\_m) / ((Kmmckat\_C4KetoCoA\_mat * Kmmckat\_CoA\_mat * Keqmckat))) / (1 + ((C16KetoCoA\_m / Kmmckat\_C16KetoCoA\_mat + C16CoA\_m / Kmmckat\_C16CoA\_mat + C14KetoCoA\_m / Kmmckat\_C14KetoCoA\_mat + C14CoA\_m / Kmmckat\_C14CoA\_mat + C12KetoCoA\_m / Kmmckat\_C12KetoCoA\_mat + C12CoA\_m / Kmmckat\_C12CoA\_mat + C10KetoCoA\_m / Kmmckat\_C10KetoCoA\_mat + C10CoA\_m / Kmmckat\_C10CoA\_mat + C8KetoCoA\_m / Kmmckat\_C8KetoCoA\_mat + C8CoA\_m / Kmmckat\_C8CoA\_mat + C6KetoCoA\_m / Kmmckat\_C6KetoCoA\_mat + C6CoA\_m / Kmmckat\_C6CoA\_mat + C4KetoCoA\_m / Kmmckat\_C4KetoCoA\_mat + C4CoA\_m / Kmmckat\_C4CoA\_mat) + AcCoA\_m / Kmmckat\_AcCoA\_mat)) * (1 + CoA\_mat / Kmmckat\_CoA\_mat + AcCoA\_m / Kmmckat\_AcCoA\_mat));$$

%MTP

$$V_{mtpC16} = sf_{mtpC16} * V_{mtp} * ((C16EnoylCoA\_m * (NADt\_mat - NADHm) * CoA\_mat) / ((Kmmtp\_C16EnoylCoA\_mat * Kmmtp\_NAD\_mat * Kmmtp\_CoA\_mat) - C14CoA\_m * NADHm * AcCoA\_m / (Kmmtp\_C16EnoylCoA\_mat * Kmmtp\_NAD\_mat * Kmmtp\_CoA\_mat * Keqmtp))) / ((1 + (C16EnoylCoA\_m / Kmmtp\_C16EnoylCoA\_mat + C16CoA\_m / Kmmtp\_C16CoA\_mat + C14EnoylCoA\_m / Kmmtp\_C14EnoylCoA\_mat + C14CoA\_m / Kmmtp\_C14CoA\_mat + C12EnoylCoA\_m / Kmmtp\_C12EnoylCoA\_mat + C12CoA\_m / Kmmtp\_C12CoA\_mat + C10EnoylCoA\_m / Kmmtp\_C10EnoylCoA\_mat + C10CoA\_m / Kmmtp\_C10CoA\_mat + C8EnoylCoA\_m / Kmmtp\_C8EnoylCoA\_mat + C8CoA\_m / Kmmtp\_C8CoA\_mat) + C6CoA\_m / Kmmtp\_C6CoA\_mat + AcetylCoA\_mat / Kimtp\_AcetoacetylCoA\_mat) * (1 + (NADt\_mat - NADHm) / Kmmtp\_NAD\_mat + NADHm / Kmmtp\_NADH\_mat) * (1 + CoA\_mat / Kmmtp\_CoA\_mat + AcCoA\_m / Kmmtp\_AcCoA\_mat));$$

$$V_{mtpC14} = sf_{mtpC14} * V_{mtp} * ((C14EnoylCoA\_m * (NADt\_mat - NADHm) * CoA\_mat) / ((Kmmtp\_C14EnoylCoA\_mat * Kmmtp\_NAD\_mat * Kmmtp\_CoA\_mat) - C12CoA\_m * NADHm * AcCoA\_m / (Kmmtp\_C14EnoylCoA\_mat * Kmmtp\_NAD\_mat * Kmmtp\_CoA\_mat * Keqmtp))) / ((1 + (C16EnoylCoA\_m / Kmmtp\_C16EnoylCoA\_mat + C16CoA\_m / Kmmtp\_C16CoA\_mat + C14EnoylCoA\_m / Kmmtp\_C14EnoylCoA\_mat + C14CoA\_m / Kmmtp\_C14CoA\_mat + C12EnoylCoA\_m / Kmmtp\_C12EnoylCoA\_mat + C12CoA\_m / Kmmtp\_C12CoA\_mat + C10EnoylCoA\_m / Kmmtp\_C10EnoylCoA\_mat + C10CoA\_m / Kmmtp\_C10CoA\_mat + C8EnoylCoA\_m / Kmmtp\_C8EnoylCoA\_mat + C8CoA\_m / Kmmtp\_C8CoA\_mat) + C6CoA\_m / Kmmtp\_C6CoA\_mat + AcetylCoA\_mat / Kimtp\_AcetoacetylCoA\_mat) * (1 + NADt\_mat - NADHm / Kmmtp\_NAD\_mat + NADHm / Kmmtp\_NADH\_mat) * (1 + CoA\_mat / Kmmtp\_CoA\_mat + AcCoA\_m / Kmmtp\_AcCoA\_mat));$$

$$V_{mtpC12} = sf_{mtpC12} * V_{mtp} * ((C12EnoylCoA\_m * (NADt\_mat - NADHm) * CoA\_mat) / (K_{mtpC12EnoylCoA\_mat} * K_{mtpNAD\_mat} * K_{mtpCoA\_mat}) - C10CoA\_m * NADHm * AcCoA\_m / (K_{mtpC12EnoylCoA\_mat} * K_{mtpNAD\_mat} * K_{mtpCoA\_mat} * Keq_{mtp})) / ((1 + (C16EnoylCoA\_m / K_{mtpC16EnoylCoA\_mat} + C16CoA\_m / K_{mtpC16CoA\_mat} + C14EnoylCoA\_m / K_{mtpC14EnoylCoA\_mat} + C14CoA\_m / K_{mtpC14CoA\_mat} + C12EnoylCoA\_m / K_{mtpC12EnoylCoA\_mat} + C12CoA\_m / K_{mtpC12CoA\_mat} + C10EnoylCoA\_m / K_{mtpC10EnoylCoA\_mat} + C10CoA\_m / K_{mtpC10CoA\_mat} + C8EnoylCoA\_m / K_{mtpC8EnoylCoA\_mat} + C8CoA\_m / K_{mtpC8CoA\_mat}) + C6CoA\_m / K_{mtpC6CoA\_mat} + AcacetylCoA\_mat / K_{mtpAcetoacetylCoA\_mat}) * (1 + NADt\_mat - NADHm / K_{mtpNAD\_mat} + NADHm / K_{mtpNADH\_mat}) * (1 + CoA\_mat / K_{mtpCoA\_mat} + AcCoA\_m / K_{mtpAcCoA\_mat}));$$

$$V_{mtpC10} = sf_{mtpC10} * V_{mtp} * ((C10EnoylCoA\_m * (NADt\_mat - NADHm) * CoA\_mat) / (K_{mtpC10EnoylCoA\_mat} * K_{mtpNAD\_mat} * K_{mtpCoA\_mat}) - C8CoA\_m * NADHm * AcCoA\_m / (K_{mtpC10EnoylCoA\_mat} * K_{mtpNAD\_mat} * K_{mtpCoA\_mat} * Keq_{mtp})) / ((1 + (C16EnoylCoA\_m / K_{mtpC16EnoylCoA\_mat} + C16CoA\_m / K_{mtpC16CoA\_mat} + C14EnoylCoA\_m / K_{mtpC14EnoylCoA\_mat} + C14CoA\_m / K_{mtpC14CoA\_mat} + C12EnoylCoA\_m / K_{mtpC12EnoylCoA\_mat} + C12CoA\_m / K_{mtpC12CoA\_mat} + C10EnoylCoA\_m / K_{mtpC10EnoylCoA\_mat} + C10CoA\_m / K_{mtpC10CoA\_mat} + C8EnoylCoA\_m / K_{mtpC8EnoylCoA\_mat} + C8CoA\_m / K_{mtpC8CoA\_mat}) + C6CoA\_m / K_{mtpC6CoA\_mat} + AcacetylCoA\_mat / K_{mtpAcetoacetylCoA\_mat}) * (1 + NADt\_mat - NADHm / K_{mtpNAD\_mat} + NADHm / K_{mtpNADH\_mat}) * (1 + CoA\_mat / K_{mtpCoA\_mat} + AcCoA\_m / K_{mtpAcCoA\_mat}));$$

$$V_{mtpC8} = sf_{mtpC8} * V_{mtp} * ((C8EnoylCoA\_m * (NADt\_mat - NADHm) * CoA\_mat) / (K_{mtpC8EnoylCoA\_mat} * K_{mtpNAD\_mat} * K_{mtpCoA\_mat}) - C6CoA\_m * NADHm * AcCoA\_m / (K_{mtpC8EnoylCoA\_mat} * K_{mtpNAD\_mat} * K_{mtpCoA\_mat} * Keq_{mtp})) / ((1 + (C16EnoylCoA\_m / K_{mtpC16EnoylCoA\_mat} + C16CoA\_m / K_{mtpC16CoA\_mat} + C14EnoylCoA\_m / K_{mtpC14EnoylCoA\_mat} + C14CoA\_m / K_{mtpC14CoA\_mat} + C12EnoylCoA\_m / K_{mtpC12EnoylCoA\_mat} + C12CoA\_m / K_{mtpC12CoA\_mat} + C10EnoylCoA\_m / K_{mtpC10EnoylCoA\_mat} + C10CoA\_m / K_{mtpC10CoA\_mat} + C8EnoylCoA\_m / K_{mtpC8EnoylCoA\_mat} + C8CoA\_m / K_{mtpC8CoA\_mat}) + C6CoA\_m / K_{mtpC6CoA\_mat} + AcacetylCoA\_mat / K_{mtpAcetoacetylCoA\_mat}) * (1 + NADt\_mat - NADHm / K_{mtpNAD\_mat} + NADHm / K_{mtpNADH\_mat}) * (1 + CoA\_mat / K_{mtpCoA\_mat} + AcCoA\_m / K_{mtpAcCoA\_mat}));$$

%% Ordinary differential equations

dydt=[fCam\*(Vuni-VnaCa); %Cam (1)  
VANT+PyrCb-VATPase-VSL; %ADPm (2)  
-(-VHNe-VHSDH-VETFH+Vhu+VANT+Vhleak+VnaCa+2\*Vuni+VIMAC)/Cimat;% Dpsim (3)  
-VNO+VIDH+VKGDH+VMDHm-VTHD+PyrDH+(NADHDemV+VmtpC16+VmschadC16  
+VmtpC14+VmschadC14+VmtpC12+VmschadC12+VmtpC10+VmschadC10+VmtpC8  
+VmschadC8+VmschadC6+VmschadC4)\*Vlcyt/Vlmat; %NADHm (4)  
beta\_matr\*(JH); %Hm (5)  
-VATPase+VPiC-VSL+PyrCb; %Pim (6)  
% VACO-VIDH; %ISO (7)  
VACO-VIDH-VIDH\_NADP; %ISO (7)  
VIDH+VAATm-VKGDH+VIDH\_NADP; %aKG (8)

## Supplementary Material

VKGDH-VSL; %SCoA (9)  
 VSL-VO2SDH; %Succ (10)  
 VO2SDH-VFH; %FUM (11)  
 VFH-VMDHm; %MAL (12)  
 % VFH-VMDHm+VOGC\*Vlcyt/Vlmat; %MAL (12)  
 VMDHm-VCS-VAATm+PyrCb; %Oaa (13)  
 (Vcpt1C16-VcactC16); %C16AcylCarn\_cy (14)  
 (VcactC16-Vcpt2C16)\*Vlcyt/Vlmat; %C16Carn\_mat (15)  
 (Vcpt2C16-VvleadC16-VleadC16)\*Vlcyt/Vlmat; %C16CoA\_mat (16)  
 (VvleadC16+VleadC16-VcrotC16-VmtpC16)\*Vlcyt/Vlmat; %C16EnoylCoA\_mat (17)  
 (VcrotC16-VmschadC16)\*Vlcyt/Vlmat; %C16OHCoA\_mat (18)  
 (VmschadC16-VmckatC16)\*Vlcyt/Vlmat; %C16KetoCoA\_mat (19)  
 (VmtpC16+VmckatC16-VvleadC14-VleadC14)\*Vlcyt/Vlmat; %C14CoA\_mat (20)  
 (VvleadC14+VleadC14-VcrotC14-VmtpC14)\*Vlcyt/Vlmat; %C14EnoylCoA\_mat (21)  
 (VcrotC14-VmschadC14)\*Vlcyt/Vlmat; %C14OHCoA\_mat (22)  
 (VmschadC14-VmckatC14)\*Vlcyt/Vlmat; %C14KetoCoA\_mat (23)  
 (VmtpC14+VmckatC14-VvleadC12-VleadC12-VmcdC12)\*Vlcyt/Vlmat; %C12CoA\_mat (24)  
 (VvleadC12+VleadC12+VmcdC12-VcrotC12-VmtpC12)\*Vlcyt/Vlmat; %C12EnoylCoA\_mat (25)  
 (VcrotC12-VmschadC12)\*Vlcyt/Vlmat; %C12OHCoA\_mat (26)  
 (VmschadC12-VmckatC12)\*Vlcyt/Vlmat; %C12KetoCoA\_mat (27)  
 (VmtpC12+VmckatC12-VmcdC10-VleadC10)\*Vlcyt/Vlmat; %C10CoA\_mat (28)  
 (VmcdC10+VleadC10-VcrotC10-VmtpC10)\*Vlcyt/Vlmat; %C10EnoylCoA\_mat (29)  
 (VcrotC10-VmschadC10)\*Vlcyt/Vlmat; %C10OHCoA\_mat (30)  
 (VmschadC10-VmckatC10)\*Vlcyt/Vlmat; %C10KetoCoA\_mat (31)  
 (VmtpC10+VmckatC10-VmcdC8-VleadC8)\*Vlcyt/Vlmat; %C8CoA\_mat (32)  
 (VmcdC8+VleadC8-VcrotC8-VmtpC8)\*Vlcyt/Vlmat; %C8EnoylCoA\_mat (33)  
 (VcrotC8-VmschadC8)\*Vlcyt/Vlmat; %C8OHCoA\_mat (34)  
 (VmschadC8-VmckatC8)\*Vlcyt/Vlmat; %C8KetoCoA\_mat (35)  
 (VmtpC8+VmckatC8-VmcdC6-VscadC6)\*Vlcyt/Vlmat; %C6CoA\_mat (36)  
 (VmcdC6+VscadC6-VcrotC6)\*Vlcyt/Vlmat; %C6EnoylCoA\_mat (37)  
 (VcrotC6-VmschadC6)\*Vlcyt/Vlmat; %C6OHCoA\_mat (38)  
 (VmschadC6-VmckatC6)\*Vlcyt/Vlmat; %C6KetoCoA\_mat (39)  
 (VmckatC6-VmcdC4-VscadC4)\*Vlcyt/Vlmat; %C4CoA\_mat (40)  
 (VmcdC4+VscadC4-VcrotC4)\*Vlcyt/Vlmat; %C4EnoylCoA\_mat (41)  
 (VcrotC4-VmschadC4)\*Vlcyt/Vlmat; %C4OHCoA\_mat (42)  
 (VmschadC4-VmckatC4)\*Vlcyt/Vlmat; %C4KetoCoA\_mat (43)  
 (VmtpC16+VmckatC16+VmtpC14+VmckatC14+VmtpC12+VmckatC12+VmtpC10+VmckatC10+V  
 mtpC8+VmckatC8+VmckatC6+2\*VmckatC4)\*Vlcyt/Vlmat+PyrDH-VCS;% AcCoA\_mat (44)  
 (VvleadC16+VleadC16+VvleadC14+VleadC14+VvleadC12+VleadC12+VmcdC12+VleadC10+  
 VmcdC10+VleadC8+VmcdC8+VmcdC6+VscadC6+VmcdC4+VscadC4)\*Vlcyt/Vlmat-  
 VO2ETF; % FADH\_m\_mat (45)  
 VIDH\_NADP+VTHD-VGRm-VTxRm; %NADPH (46)  
 shunt\*(VNO+VO2SDH+VO2ETF)-VMnSOD-VtrROS;%SO2m (47)  
 Vlmat/Vlcyt\*VtrROS-VCuZnSOD; %SO2i (48)  
 VMnSOD-VdifH2O2-VGPXm-VTxPXm; %H2O2m (49)  
 VCuZnSOD+Vlmat/Vlcyt\*VdifH2O2-VGPX-VTxPX-Vcat; %H2O2i (50)  
 VGRm-VGPXm-VGRXm+VGST-VPSSGm; %GSHm (51)

```

VGR-VGPX-VGRX-Vlmat/Vlcyt*VGST-VPSSGi; %GSHi (52)
5.0D-1*(VGPXm-VGRm)+VGRXm; %GSSGm (53)
VTxRm-VTxPXm; %TrxSH2m (54)
VTxR-VTxPX; %TrxSH2 (55)
5.0D-1*(VGPX-VGR)+VGRX+0.5*Vlmat/Vlcyt*VGST; %GSSGi (56)
VPSSGm-VGRXm; %PSSGm (57)
VPSSGi-VGRX; %PSSGi (58)
GLUT4V-HKV-ALR1V; %Glc (59)
HKV-PFKV-G6PDHV+RTAIV+RTAc2V+VPGLM; %G6P+F6P (60)
PFKV-ALDV; %F16BP (61)
2*ALDV-GAPDHV+RTAcV-RTAIV+RTAc2V; %G3P (62)
GAPDHV-PGKV; %G13BP (63)
PGKV-ENOLV; %2PG + 3PG (name GP3) (64)
ENOLV-PKV; %PEP (65)
PKV-LDHV-PyrCV; %Pyr (66)
ALR1V-SoDHV; %Sorbitol (67)
SoDHV-FRUTV; %Fructose (68)
G6PDHV-P6GDHV; %GO6P (69)
P6GDHV-R5PIV-Ru5PEV; %Ru5P (Ribulose 5P) (70)
R5PIV-RTAcV; %R5P (Ribose5P) (71)
Ru5PEV-RTAcV-RTAc2V-XyDHV; %X5P (Xylulose5P) (72)
RTAcV-RTAIV; %S7P (Sedoheptulose 7P) (73)
RTAIV-RTAc2V; %E4P (Erythrose 4P) (74)
XyDHV-XiOHTV; %Xilitol (75)
-HKV-PFKV+PGKV+PKV-HYdroATPV+VANT*Vlmat/Vlcyt; %ATP (76)
+GAPDHV-LDHV+SoDHV-XyDHV-NADHDemV; %NADH cyto (77)
+G6PDHV+P6GDHV-ALR1V-NADPHDemV; %NADPH cyto (78)
+VAmil-VGPa-VGPb; %Manosides (79)
+VGPa+VGPb-VPGLM; % G1P (80)
+PyrCV*Vlcyt/Vlmat-PyrDH-PyrCb; %Pyr in mito (81)
VCS-VACO-VCiC;]; % CIT_m (82)
return

```

### Running file “Simulations\_WholeCatab\_v3.m”

```

y0=[0.000260;0.6974197;178.9;0.1063;3.5077e-05;0.02368;7.89030e-05;0.00305589;
0.0173849568;5.3303e-06;0.019637;0.00026358;1.26834e-06;0.4125;12.890;0.060346;0.00020047;
3.5266e-05;0.00524036;0.01876866;6.2341e-05;6.2460e-06;0.000922;0.0032564;1.0818e-05;
5.7067e-06;0.000834437;0.00297124;9.87053e-06;7.5012e-06;0.0010892;0.00388849;1.29179e-05;
1.845966e-05;0.0026756;0.009542865;3.1702e-05;0.00017573;0.0261349;0.093912;0.000311989;
0.001096287;0.16306;0.58598;0.699612;0.026291;3.06032e-07;1.0431e-10;7.95128e-07;9.5004e-10
;0.310514;0.310514;0.7635947;0.024757;0.0499999;0.002079;0.000561024;1.7666759e-06;
0.4219823;0.731687;0.016394;0.0010467;0.0015676;0.1080516;0.0002864;0.0085887;0.170537;
0.0080778;2.0797e-06;0.026169;0.020051;0.0477454;0.3933296;0.02151581;2.04476e-06; 5.06934;
0.05237;0.03846;0.0028666;0.18998;0.0087969;0.0009419];
options=odeset('RelTol',1e-12,'AbsTol',1e-16);
ode=@(t,kmrgd) WholeCatab_v3(t,kmrgd); %

```

```
tspan= [0; 5.0E12];  
sol=ode15s(ode,tspan,y0,options); %
```
